# Supplementary material for: Sulfonylation of aryl boronic acids by sulfonyl fluorides in water under visible-light irradiation
Source: Royal Society of Chemistry journal article supplement (doi:10.1039/d2qo01429g), 2022-11-23
Supplement: d2qo01429g1.pdf [file d2qo01429g1.pdf]

## SUPPORTING INFORMATION

### Sulfonylation of Aryl Boronic Acids by Sulfonyl Fluorides in water under Visible Light Irradiation

Jingsong Zhen<sup>a,b</sup>, Yihui Li<sup>a</sup>, Han Yuan<sup>a</sup>, Xiaohong Xu<sup>a</sup>, Xian Du<sup>a</sup>, Xin-Qing Li<sup>c</sup>\*, Yong Luo<sup>a,b</sup>\*

<sup>a</sup>School of Pharmaceutical Sciences (Shenzhen), Shenzhen Campus of Sun Yat-sen University, Shenzhen, 518107, China.

<sup>b</sup>Key Laboratory of Functional Molecular Solids, Ministry of Education, Anhui Normal University, Wuhu, 241002, China

<sup>c</sup>Department of Pharmacy, Ganzhou People's Hospital (The Affiliated Ganzhou Hospital of Nanchang University), Ganzhou, 341000, China.

---

\* Dr. Xin-Qing Li

E-mail address: [lixinqing16@163.com](mailto:lixinqing16@163.com)

\* Dr. Yong Luo

E-mail address: [luoyong5@mail.sysu.edu.cn](mailto:luoyong5@mail.sysu.edu.cn)

# Table of Contents

|                                                                         |            |
|-------------------------------------------------------------------------|------------|
| <b>1. General Information.....</b>                                      | <b>S3</b>  |
| <b>2. Optimization of Reaction Conditions .....</b>                     | <b>S4</b>  |
| <b>3. General Procedures .....</b>                                      | <b>S5</b>  |
| 3.1. Preparation of Sulfonyl Fluorides .....                            | S5         |
| 3.2. General Procedure A: Substrate Scope of Boronic Acids .....        | S5         |
| 3.3. General Procedure B: Substrate Scope of Sulfonyl Fluorides .....   | S5         |
| <b>4. Derivative Experiments .....</b>                                  | <b>S6</b>  |
| 4.1. Control Experiments: Sulfonyl Fluoride vs. Sulfonyl Chloride ..... | S6         |
| 4.2. Control Experiments: Water vs. PBS .....                           | S6         |
| 4.3. Scale-up Experiments .....                                         | S6         |
| 4.4. Tandem One-pot Reactions of Sulfonyl Fluorides .....               | S7         |
| <b>5. Mechanism Studies .....</b>                                       | <b>S9</b>  |
| 5.1. UV-Vis Absorption Spectra Studies .....                            | S9         |
| 5.2. Stern-Volmer Quenching Experiments .....                           | S10        |
| 5.3. Control Experiments .....                                          | S11        |
| <b>6. Characterization of Products .....</b>                            | <b>S12</b> |
| <b>7. Spectra for Described Compounds .....</b>                         | <b>S20</b> |
| <b>8. References .....</b>                                              | <b>S56</b> |

## 1. General Information

Sulfonyl chlorides, boronic acids and solvents were purchased from commercial sources (Adamas-Beta Co., Bidepharm Co. or Energy Chemical Co.) and used as received.  $[\text{Ir}[\text{dF}(\text{CF}_3)\text{ppy}]_2(\text{dtbbpy})]\text{PF}_6$ ,  $[\text{Ir}[\text{dF}(\text{CF}_3)\text{ppy}]_2(\text{bpy})]\text{PF}_6$ ,  $[\text{Ir}(\text{ppy})_2(\text{dtbbpy})]\text{PF}_6$ ,  $[\text{Ir}(\text{ppy})_2(\text{bpy})]\text{PF}_6$ ,  $[\text{Ru}(\text{bpy})_3]\text{PF}_6$  and 4-CzIPN were prepared according to the literature procedures.<sup>[1-3]</sup> Thin-layer chromatography (TLC) was performed on glass plates coated with silica gel 60 F254, 0.2 mm thickness. The plates were visualized using a 254 nm ultraviolet lamp or iodine cylinder. Flash chromatography was performed using silica gel, 300-400 mesh. Products were identified using NMR analysis and comparison with authentic samples. NMR spectra were recorded in  $\text{CDCl}_3$  on Bruker spectrometers at 400 MHz. All chemical shifts are reported in parts per million (ppm) relative to residual  $\text{CDCl}_3$  peak (7.26 and 77.0 ppm,  $^1\text{H}$  NMR and  $^{13}\text{C}$  NMR, respectively). Data for NMR are reported as follows: chemical shift ( $\delta$  ppm), integration, multiplicity (s = singlet, d = doublet, t = triplet, q = quartet, m = multiplet), coupling constant (Hz), and assignment. High resolution mass spectra were obtained on a Waters Synapt G2-Si (ESI) or Thermofisher Q Exactive GC (EI). UV-Visible absorption spectra were recorded on a YOKE double beam UV-vis spectrophotometer-T3202S. UV-Visible emission spectra were recorded on a TECHCOMP fluorescence spectrometer-FL970. GC data were recorded on a FULI INSTRUMENT GC9790Plus.

Blue LEDs (30 W, 455 nm) were purchased from Shenzhen FENGSHENG Electronic Technology Co., and the parameter information was shown below.

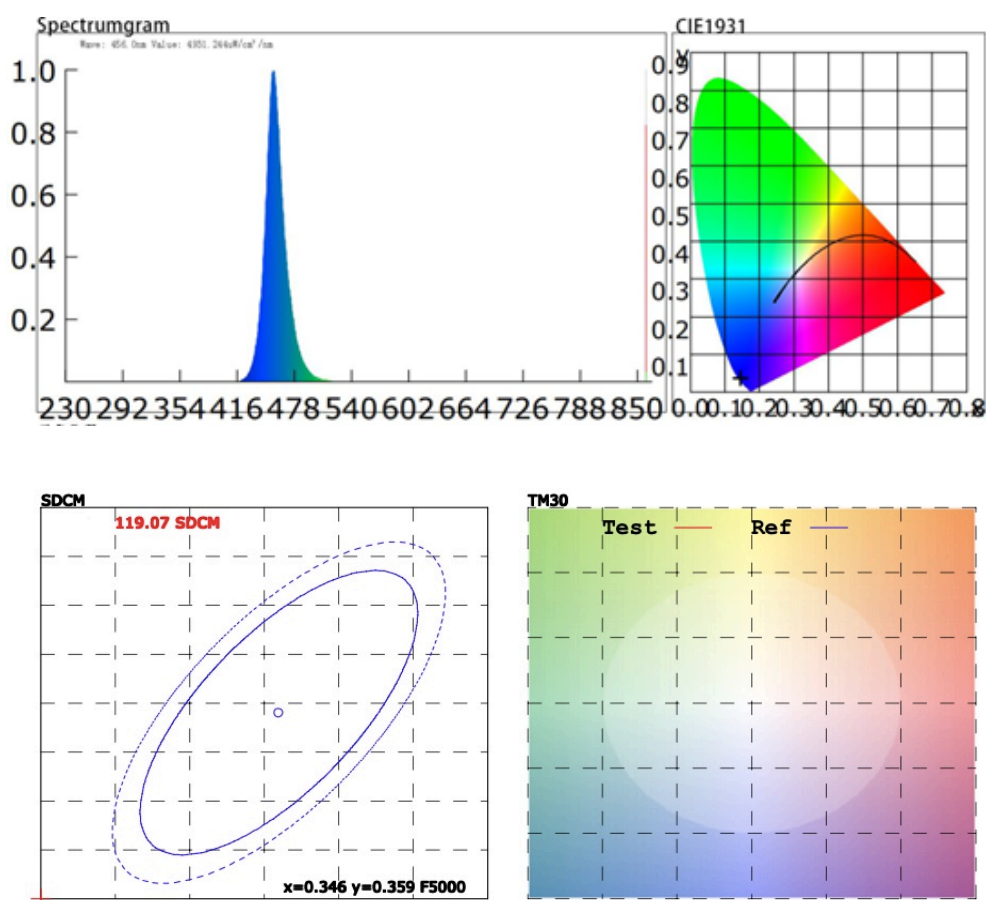

## 2. Optimization of Reaction Conditions

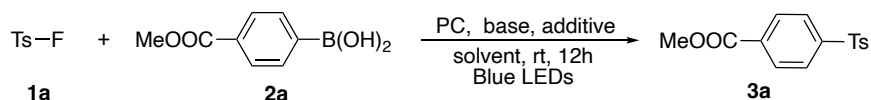

| Entry | PC                                             | base                            | additive | solvent          | <sup>b</sup> Yield (%) |
|-------|------------------------------------------------|---------------------------------|----------|------------------|------------------------|
| 1     | [Ir(ppy) <sub>2</sub> (dtbbpy)]PF <sub>6</sub> | K <sub>2</sub> CO <sub>3</sub>  | -        | 1,4-dioxane      | trace                  |
| 2     | [Ru(bpy) <sub>3</sub> ]PF <sub>6</sub>         | K <sub>2</sub> CO <sub>3</sub>  | -        | 1,4-dioxane      | nd                     |
| 3     | Solvent Red                                    | K <sub>2</sub> CO <sub>3</sub>  | -        | 1,4-dioxane      | trace                  |
| 4     | Rhodamine B                                    | K <sub>2</sub> CO <sub>3</sub>  | -        | 1,4-dioxane      | 11                     |
| 5     | Fluorescein                                    | K <sub>2</sub> CO <sub>3</sub>  | -        | 1,4-dioxane      | trace                  |
| 6     | Mes-Arc                                        | K <sub>2</sub> CO <sub>3</sub>  | -        | 1,4-dioxane      | nd                     |
| 7     | 4-CzIPN                                        | K <sub>2</sub> CO <sub>3</sub>  | -        | 1,4-dioxane      | 70                     |
| 8     | 4-CzIPN                                        | -                               | -        | 1,4-dioxane      | nd                     |
| 9     | 4-CzIPN                                        | CsF                             | -        | 1,4-dioxane      | 38                     |
| 10    | 4-CzIPN                                        | K <sub>2</sub> HPO <sub>4</sub> | -        | 1,4-dioxane      | 16                     |
| 11    | 4-CzIPN                                        | K <sub>3</sub> PO <sub>4</sub>  | -        | 1,4-dioxane      | 14                     |
| 12    | 4-CzIPN                                        | Cs <sub>2</sub> CO <sub>3</sub> | -        | 1,4-dioxane      | 68                     |
| 13    | 4-CzIPN                                        | NEt <sub>3</sub>                | -        | 1,4-dioxane      | nd                     |
| 14    | 4-CzIPN                                        | DMAP                            | -        | 1,4-dioxane      | nd                     |
| 15    | 4-CzIPN                                        | DABCO                           | -        | 1,4-dioxane      | nd                     |
| 16    | 4-CzIPN                                        | Rb <sub>2</sub> CO <sub>3</sub> | -        | 1,4-dioxane      | 74                     |
| 17    | 4-CzIPN                                        | Rb <sub>2</sub> CO <sub>3</sub> | -        | THF              | 46                     |
| 18    | 4-CzIPN                                        | Rb <sub>2</sub> CO <sub>3</sub> | -        | DME              | 24                     |
| 19    | 4-CzIPN                                        | Rb <sub>2</sub> CO <sub>3</sub> | -        | DMSO             | 13                     |
| 20    | 4-CzIPN                                        | Rb <sub>2</sub> CO <sub>3</sub> | -        | DMA              | 15                     |
| 21    | 4-CzIPN                                        | Rb <sub>2</sub> CO <sub>3</sub> | -        | MeCN             | trace                  |
| 22    | 4-CzIPN                                        | Rb <sub>2</sub> CO <sub>3</sub> | -        | H <sub>2</sub> O | nd                     |
| 23    | 4-CzIPN                                        | Rb <sub>2</sub> CO <sub>3</sub> | Tween20  | H <sub>2</sub> O | 80                     |
| 24    | 4-CzIPN                                        | Rb <sub>2</sub> CO <sub>3</sub> | Tween60  | H <sub>2</sub> O | 74                     |
| 25    | 4-CzIPN                                        | Rb <sub>2</sub> CO <sub>3</sub> | Span40   | H <sub>2</sub> O | nd                     |
| 26    | 4-CzIPN                                        | Rb <sub>2</sub> CO <sub>3</sub> | TBAB     | H <sub>2</sub> O | 23                     |
| 27    | 4-CzIPN                                        | Rb <sub>2</sub> CO <sub>3</sub> | BrijL23  | H <sub>2</sub> O | 43                     |
| 28    | 4-CzIPN                                        | Rb <sub>2</sub> CO <sub>3</sub> | DDBS     | H <sub>2</sub> O | 13                     |
| 29    | 4-CzIPN                                        | Rb <sub>2</sub> CO <sub>3</sub> | Betaine  | H <sub>2</sub> O | nd                     |
| 30    | -                                              | Rb <sub>2</sub> CO <sub>3</sub> | Tween20  | H <sub>2</sub> O | nd                     |
| 31    | 4-CzIPN                                        | Rb <sub>2</sub> CO <sub>3</sub> | Tween20  | H <sub>2</sub> O | <sup>c</sup> nd        |
| 32    | 4-CzIPN                                        | Rb <sub>2</sub> CO <sub>3</sub> | Tween20  | H <sub>2</sub> O | <sup>d</sup> nd        |

<sup>a</sup> Reaction conditions: **1a** (0.3 mmol, 1.5 equiv), **2a** (0.2 mmol, 1.0 equiv), PC (1 mol%), base (0.4 mmol, 2.0 equiv), additive (3.2 equiv), solvent (1 mL), 30 W blue LED, N<sub>2</sub>, 12 h, room temperature. nd = not detected. TBAB = Tetrabutylammonium bromide. BrijL23 = Polyoxyethylene lauryl ether. DDBS = Sodium dodecylbenzenesulphonate.

<sup>b</sup> GC yield was calculated with Dodecane as internal standard. <sup>c</sup> Under air. <sup>d</sup> In dark.

### 3. General Procedures

#### 3.1 Preparation of Sulfonyl Fluorides (Cl-F exchanging)

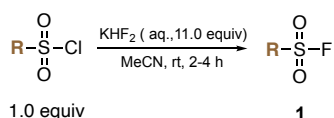

Sulfonyl chloride (5 mmol, 1.0 equiv) was dissolved in MeCN (10 mL), and aq. KHF<sub>2</sub> (10 mL, 11.0 equiv) was added. The suspension was stirred for 2-4 hours at room temperature. Then the reaction mixture was diluted with H<sub>2</sub>O (5 mL) and extracted with EtOAc (3 x 5 mL). The combined organic layer was dried over Na<sub>2</sub>SO<sub>4</sub>, and filtrate was concentrated in vacuo to directly give the desired sulfonyl fluoride.

#### 3.2. General Procedure A: Substrate Scope of Boronic Acids

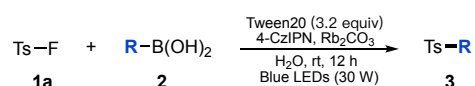

An oven-dried Schlenk tube equipped with a stir bar was charged with sulfonyl fluoride **1a** (0.3 mmol, 1.5 equiv), boronic acid **2** (0.2 mmol, 1.0 equiv), Rb<sub>2</sub>CO<sub>3</sub> (0.4 mmol, 2.0 equiv) and 4-CzIPN (1 mol%). Then the tube was sealed with a cap, evacuated and backfilled with nitrogen for 3 times. Subsequently, Tween20 (0.2 mL, 3.2 equiv) and H<sub>2</sub>O (1 mL) was added. The tube was placed in a water bath with irradiation by 30 W blue LEDs (455 nm, distance: 1 cm, the reaction temperature reached room temperature) for 12 hours. Then the mixture was washed with sat. aq. NH<sub>4</sub>Cl (1 x 2 mL), diluted with EtOAc (1 x 4 mL), and concentrated. The crude product was purified by flash chromatography (EtOAc/PE: 1/4, unless otherwise noted) to give analytically pure product **3**.

#### 3.3. General Procedure B: Substrate Scope of Sulfonyl Fluorides

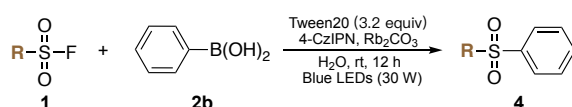

An oven-dried Schlenk tube equipped with a stir bar was charged with sulfonyl fluoride **1** (0.3 mmol, 1.5 equiv), boronic acid **2b** (0.2 mmol, 1.0 equiv), Rb<sub>2</sub>CO<sub>3</sub> (0.4 mmol, 2.0 equiv) and 4-CzIPN (1 mol%). Then the tube was sealed with a cap, evacuated and backfilled with nitrogen for 3 times. Subsequently, Tween20 (0.2 mL, 3.2 equiv) and H<sub>2</sub>O (1 mL) was added. The tube was placed in a water bath with irradiation by 30 W blue LEDs (455 nm, distance: 1 cm, the reaction temperature reached room temperature) for 12 hours. Then the mixture was washed with sat. aq. NH<sub>4</sub>Cl (1 x 2 mL), diluted with EtOAc (1 x 4 mL), and concentrated. The crude product was purified by flash chromatography (EtOAc/PE: 1/4, unless otherwise noted) to give analytically pure product **4**.

## 4. Derivative Experiments

### 4.1. Control Experiments: Sulfonyl Fluoride vs. Sulfonyl Chloride

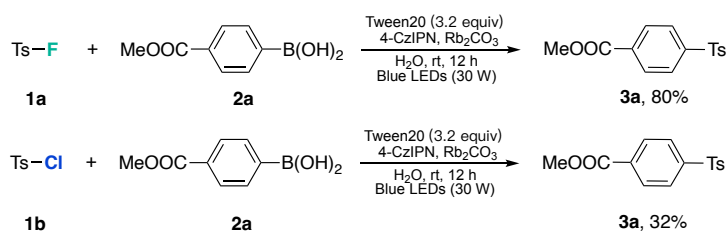

An oven-dried Schlenk tube equipped with a stir bar was charged with sulfonyl fluoride **1a** or **1b** (0.3 mmol, 1.5 equiv), boronic acid **2a** (0.2 mmol, 1.0 equiv), Rb<sub>2</sub>CO<sub>3</sub> (0.4 mmol, 2.0 equiv) and 4-CzIPN (1 mol%). Then the tube was sealed with a cap, evacuated and backfilled with nitrogen for 3 times. Subsequently, Tween20 (0.2 mL, 3.2 equiv) and H<sub>2</sub>O (1 mL) was added. The tube was placed in a water bath with irradiation by 30 W blue LEDs (455 nm, distance: 1 cm, the reaction temperature reached room temperature) for 12 hours. Then the mixture was washed with sat. aq. NH<sub>4</sub>Cl (1 x 2 mL), diluted with EtOAc (1 x 4 mL), and concentrated. The crude product was purified by flash chromatography (EtOAc/PE: 1/4) to give analytically pure product **3a**.

### 4.2. Control Experiments: Water vs. PBS

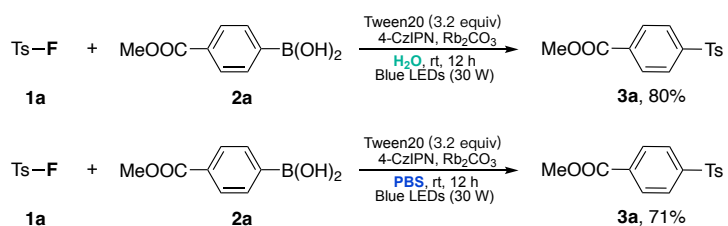

An oven-dried Schlenk tube equipped with a stir bar was charged with sulfonyl fluoride **1a** (0.3 mmol, 1.5 equiv), boronic acid **2a** (0.2 mmol, 1.0 equiv), Rb<sub>2</sub>CO<sub>3</sub> (0.4 mmol, 2.0 equiv) and 4-CzIPN (1 mol%). Then the tube was sealed with a cap, evacuated and backfilled with nitrogen for 3 times. Subsequently, Tween20 (0.2 mL, 3.2 equiv) and H<sub>2</sub>O or PBS (1 mL) was added. The tube was placed in a water bath with irradiation by 30 W blue LEDs (455 nm, distance: 1 cm, the reaction temperature reached room temperature) for 12 hours. Then the mixture was washed with sat. aq. NH<sub>4</sub>Cl (1 x 2 mL), diluted with EtOAc (1 x 4 mL), and concentrated. The crude product was purified by flash chromatography (EtOAc/PE: 1/4) to give analytically pure product **3a**.

### 4.3. Scale-up Experiments

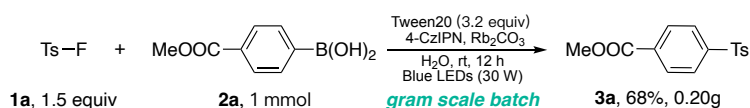

A scale-up experiment for synthesis of **3a** was carried out by following the **General Procedure A**. The whole process was carried out in an oven-dried 50 mL round bottom flask. Finally, **3a** was purified to afford as colorless solid, 0.20 g, 68% yield.

## 4.4. Tandem One-pot Reactions of Sulfonyl Fluorides

### 4.4.1. Cross-coupling

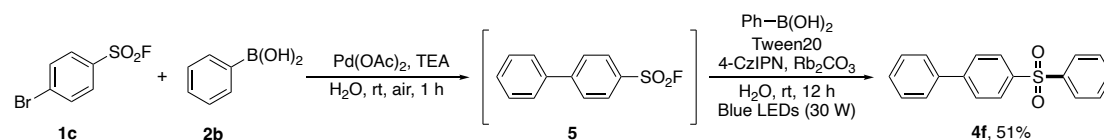

An oven-dried Schlenk tube equipped with a stir bar was charged with 4-bromobenzenesulfonyl fluoride **1c** (0.3 mmol, 1.5 equiv), phenylboronic acid **2b** (0.45 mmol, 2.25 equiv), TEA (0.9 mmol, 4.5 equiv), palladium (II) acetate (1 mol%) and H<sub>2</sub>O (1 mL). The suspension was stirred under air at room temperature for 1 hour. After that, the suspension was washed with aq. HBr (1 mL, 1 M), and extracted with EtOAc (2 x 1 mL). The organic layer was placed in a new oven-dried Schlenk tube, and concentrated. Then phenylboronic acid (0.2 mmol, 1.0 equiv), Rb<sub>2</sub>CO<sub>3</sub> (0.4 mmol, 2.0 equiv) and 4-CzIPN (1 mol%) was added in H<sub>2</sub>O (1 mL). Then the tube was sealed with a cap, evacuated and backfilled with nitrogen for 3 times. Subsequently, Tween20 (0.2 mL, 3.2 equiv) was added. The tube was placed in a water bath with irradiation by 30 W blue LEDs (455 nm, distance: 1 cm, the reaction temperature reached room temperature) for 12 hours. Then the mixture was washed with sat. aq. NH<sub>4</sub>Cl (1 x 2 mL) and diluted with EtOAc (1 x 4 mL). The crude product was purified by flash chromatography (EtOAc/PE: 1/4) to give analytically pure product **4f**.

### 4.4.2. Esterification

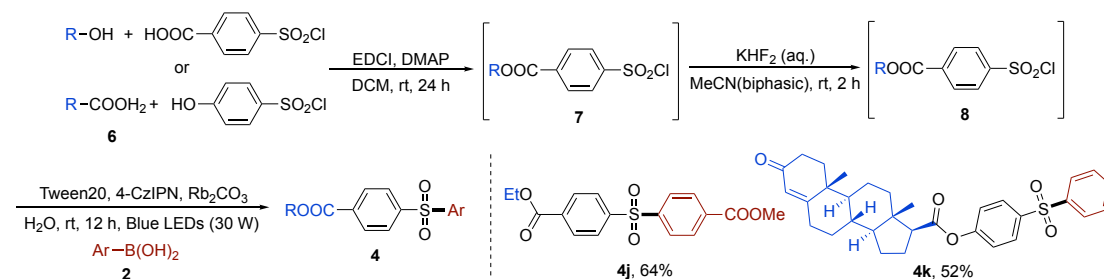

Carboxylic acid (1 mmol, 5.0 equiv.), hydroxyl substrate (1 mmol) and EDCI (1-ethyl-3-(3-(dimethylamino)propyl) carbodiimide hydrochloride) (1.1 mmol) was suspended in DCM (10 mL) and stirred at room temperature for 24 hours. The reaction mixture was diluted with DCM and quenched with sat. aq. NaHCO<sub>3</sub> (10 mL). The aqueous layer was extracted with DCM (3 x 5 mL). The combined organic layer was dried over Na<sub>2</sub>SO<sub>4</sub>. The filtrate was concentrated in vacuo and the residue was then suspended in sat. aq. KHF<sub>2</sub> (1.1 mmol, 2 mL) and MeCN (2 mL), and stirred at room temperature for 2 hours. The reaction mixture was diluted with EtOAc (1 mL) and water (2 mL). The aqueous layer was extracted with EtOAc (3 x 1 mL). The combine organic layer was dried over Na<sub>2</sub>SO<sub>4</sub>. The filtrate was concentrated in vacuo. Then follow the **General Procedure B** to give analytically pure product **4j** and **4k** (EtOAc/PE: 1/1).

#### 4.4.3. Acyl Esterification

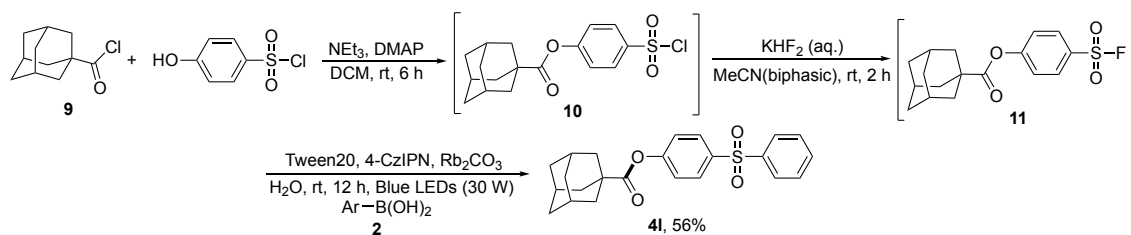

4-hydroxybenzenesulfonyl chloride (1.1 mmol, 5.5 equiv), DMAP (4-dimethylaminepyridine) (0.2 mmol) and Et<sub>3</sub>N (2.2 mmol) in DCM (10 mL) was suspended and stirred for 10 minutes. Then 1-Adamantanecarbonyl chloride **9** (1 mmol, 5.0 equiv) was added dropwise at 0 °C. The reaction mixture was warmed to room temperature and stirred for 6 hours before quenching with H<sub>2</sub>O (5 mL) and extracting with DCM (3 x 5 mL). The combined organic layer was dried over Na<sub>2</sub>SO<sub>4</sub>. The filtrate was concentrated in vacuo and the residue was then suspended in sat. aq. KHF<sub>2</sub> (1.1 mmol, 2 mL) and MeCN (2 mL), and stirred at room temperature for 2 hours. The reaction mixture was diluted with EtOAc (1 mL) and water (2 mL). The aqueous layer was extracted with EtOAc (3 x 1 mL). The combine organic layer was dried over Na<sub>2</sub>SO<sub>4</sub>. The filtrate was concentrated in vacuo. Then follow the **General Procedure B** to give analytically pure product **41**.



## 5. Mechanism Studies

### 5.1. UV-Vis Absorption Spectra Studies

UV-visible spectrum was conducted with **1a** (0.075 M), **2a** (0.05 M), base ( $\text{Rb}_2\text{CO}_3$ , 0.1 M) and 4-CzIPN (1 mol%) in degassed THF.

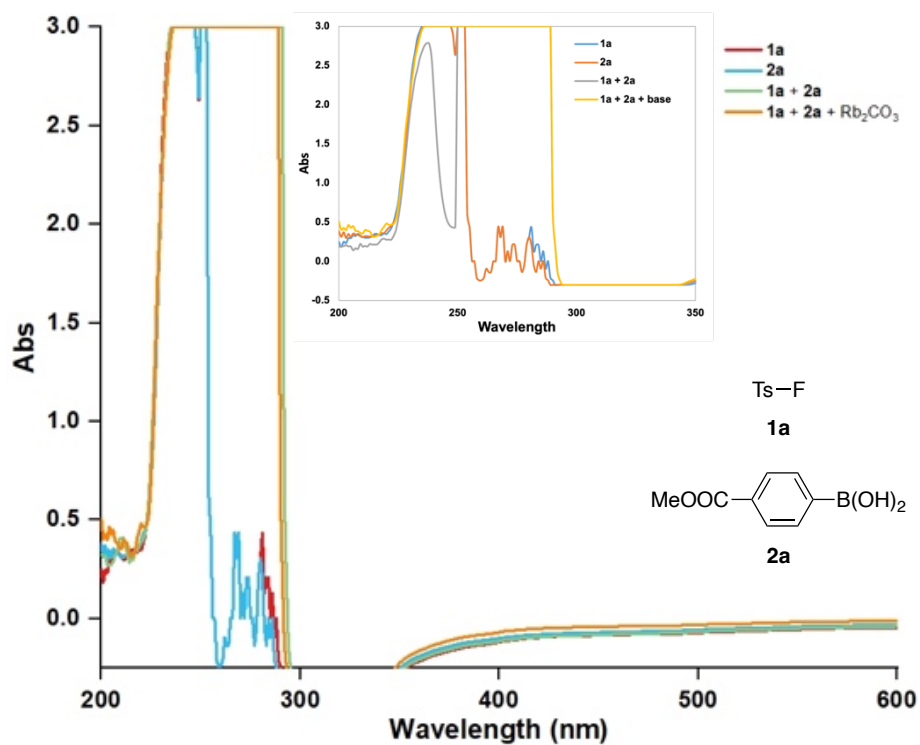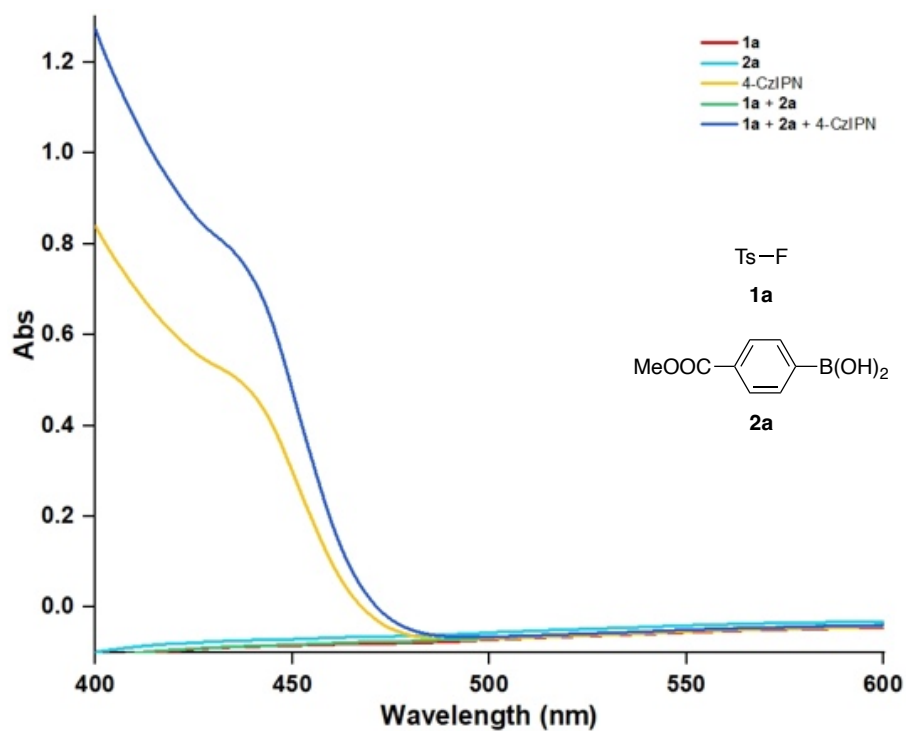

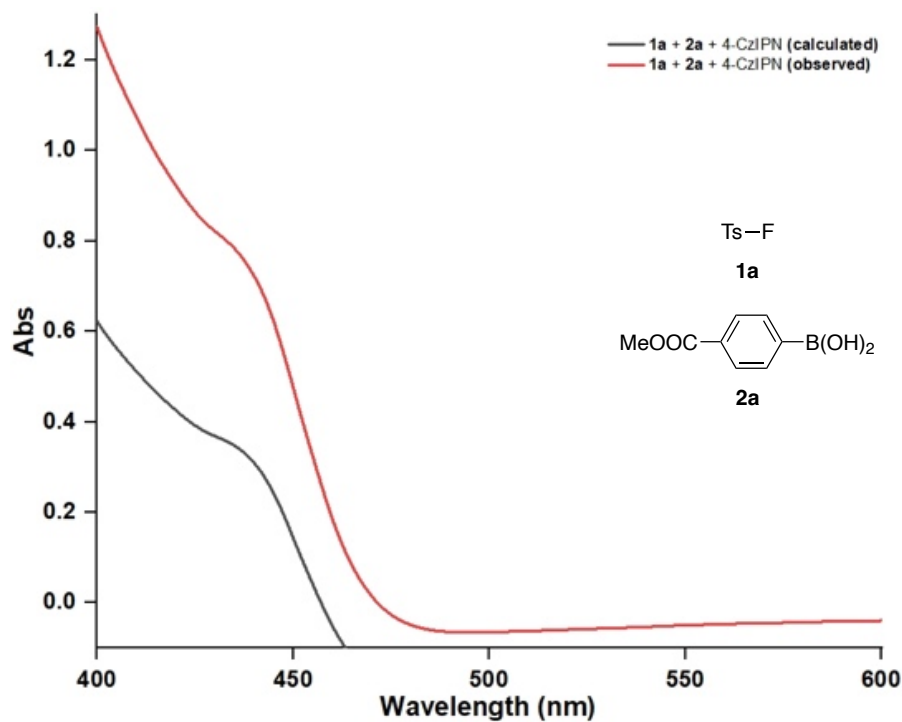

## 5.2. Stern-Volmer Quenching Experiments

Stern-Volmer experiments were conducted with 0.3 mM  $[\text{Ir}(\text{ppy})_2(\text{dtbbpy})]\text{PF}_6$  and while probing the quenching ability of **1a**, **2a**, **1a + base**, **2a + base** and **1a + 2a + base** (in degassed THF). The solutions were irradiated at 361 nm and luminescence was measured at 524 nm.

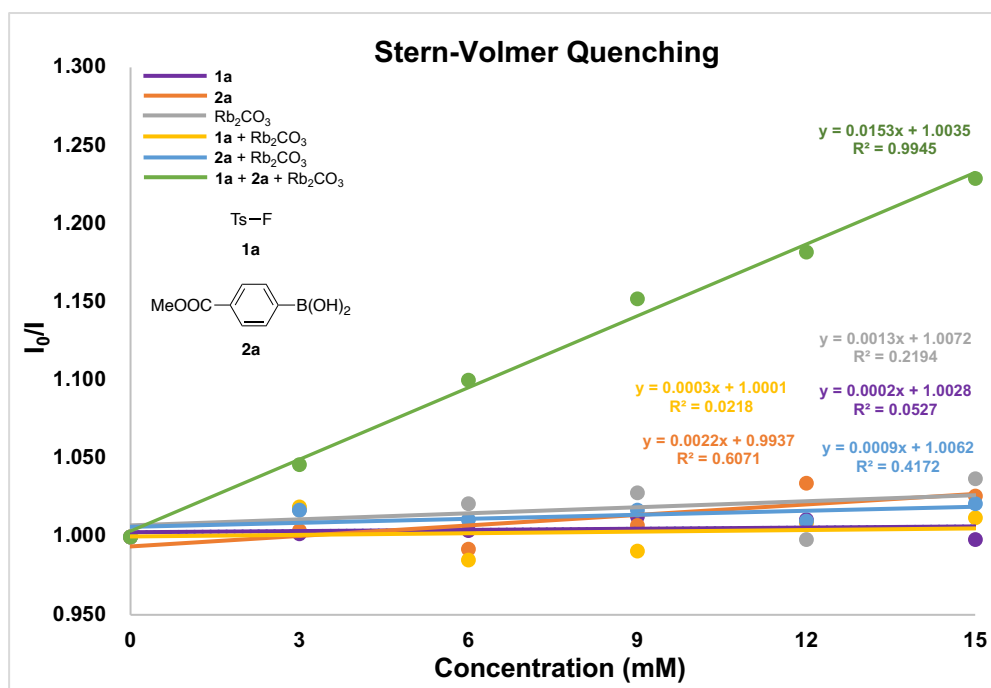

### 5.3. Control Experiments

a) Radical Trapping with TEMPO (2,2,6,6-tetramethylpiperidinoxy)

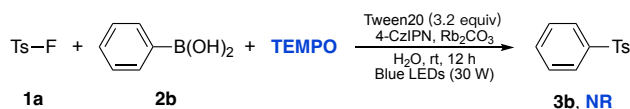

b) Sodium 4-toluenesulfinate (1d) Instead

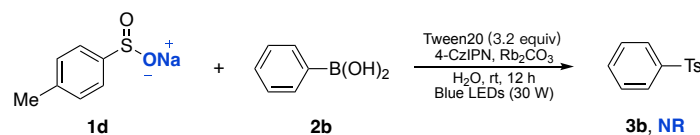

c) Radical Trapping with DPE (1,1-diphenylethylene)

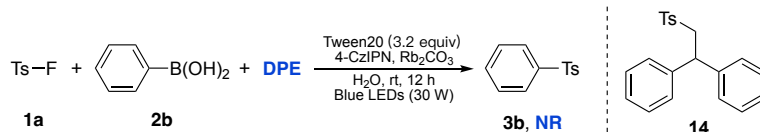

#### a) Radical Trapping Experiments with TEMPO

An oven-dried Schlenk tube equipped with a stir bar was charged with sulfonyl fluoride **1a** (0.3 mmol, 1.5 equiv), boronic acid **2b** (0.2 mmol, 1.0 equiv),  $\text{Rb}_2\text{CO}_3$  (0.4 mmol, 2.0 equiv), 4-CzIPN (1 mol%) and TEMPO (2,2,6,6-Tetramethylpiperidinoxy) (0.2 mmol, 1.0 equiv). Then follow the **General Procedure B**. Finally, the desired product was not detected.

#### b) Sodium 4-toluenesulfinate Instead

An oven-dried Schlenk tube equipped with a stir bar was charged with sodium 4-toluenesulfinate **1d** (0.3 mmol, 1.5 equiv), boronic acid **2b** (0.2 mmol, 1.0 equiv),  $\text{Rb}_2\text{CO}_3$  (0.4 mmol, 2.0 equiv) and 4-CzIPN (1 mol%). Then follow the **General Procedure B**. Finally, the desired product was not detected.

#### c) Radical Trapping Experiments with DPE

An oven-dried Schlenk tube equipped with a stir bar was charged with sulfonyl fluoride **1a** (0.3 mmol, 1.5 equiv), boronic acid **2b** (0.2 mmol, 1.0 equiv),  $\text{Rb}_2\text{CO}_3$  (0.4 mmol, 2.0 equiv), 4-CzIPN (1 mol%) and DPE (1,1-diphenylethylene) (0.2 mmol, 1.0 equiv). Then follow the **General Procedure B**. Finally, the desired product was not detected yet DPE adduct **14** was detected by HRMS (ESI/[M-H]<sup>+</sup>): Calculated for  $\text{C}_{21}\text{H}_{20}\text{O}_2\text{S}$ : 335.1106, Found: 335.1107.

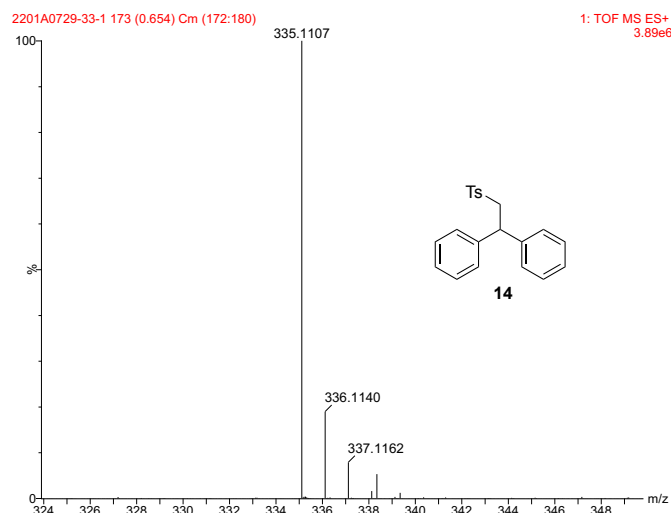

## 6. Characterization of Products

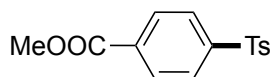

Following the **General Procedure A**, **3a** was isolated as white solid (46.5 mg, 80%).

**<sup>1</sup>H NMR** (400 MHz, CDCl<sub>3</sub>) δ 8.13 (d, *J* = 8.0 Hz, 2H), 7.98 (d, *J* = 8.0 Hz, 2H), 7.83 (d, *J* = 8.0 Hz, 2H), 7.31 (d, *J* = 8.0 Hz, 2H), 3.92 (s, 3H), 2.40 (s, 3H). **<sup>13</sup>C NMR** (101 MHz, CDCl<sub>3</sub>) δ 165.5, 145.9, 144.8, 137.8, 134.0, 130.4, 130.1, 127.9, 127.5, 52.7, 21.6. **HRMS** (ESI/[M+H]<sup>+</sup>) calculated for C<sub>15</sub>H<sub>15</sub>O<sub>4</sub>S: 291.0686, found: 291.0682.

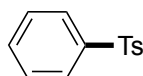

Following the **General Procedure A**, **3b** was isolated as white solid (23.7 mg, 51%).

**<sup>1</sup>H NMR** (400 MHz, CDCl<sub>3</sub>) δ 7.93 (d, *J* = 8.0 Hz, 2H), 7.83 (d, *J* = 8.0 Hz, 2H), 7.56–7.47 (m, 3H), 7.29 (d, *J* = 8.0 Hz, 2H), 2.39 (s, 3H). **<sup>13</sup>C NMR** (101 MHz, CDCl<sub>3</sub>) δ 144.3, 142.1, 138.7, 133.1, 130.0, 129.3, 127.8, 127.6, 21.6. **HRMS** (ESI/[M+H]<sup>+</sup>) calculated for C<sub>14</sub>H<sub>15</sub>O<sub>2</sub>S: 247.0787, found: 247.0788.

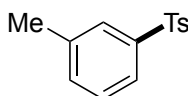

Following the **General Procedure A**, **3c** was isolated as white solid (26.1 mg, 53%).

**<sup>1</sup>H NMR** (400 MHz, CDCl<sub>3</sub>) δ 7.82 (d, *J* = 8.0 Hz, 2H), 7.72 (d, *J* = 8.0 Hz, 2H), 7.36 (d, *J* = 8.0 Hz, 2H), 7.29 (d, *J* = 8.0 Hz, 2H), 2.39 (s, 6H). **<sup>13</sup>C NMR** (101 MHz, CDCl<sub>3</sub>) δ 144.1, 141.8, 139.5, 138.8, 133.8, 129.9, 129.1, 127.8, 127.7, 124.7, 21.6, 21.4. **HRMS** (ESI/[M+H]<sup>+</sup>) calculated for C<sub>14</sub>H<sub>15</sub>O<sub>2</sub>S: 247.0787, found: 247.0788.

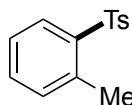

Following the **General Procedure A**, **3d** was isolated as white solid (27.1 mg, 55%).

**<sup>1</sup>H NMR** (400 MHz, CDCl<sub>3</sub>) δ 8.04–7.99 (m, 4H), 7.82 (d, *J* = 8.0 Hz, 2H), 7.31 (d, *J* = 8.0 Hz, 2H), 2.60 (s, 3H), 2.39 (s, 3H). **<sup>13</sup>C NMR** (101 MHz, CDCl<sub>3</sub>) δ 144.0, 139.2, 138.3, 137.9, 133.7, 132.6, 129.7, 129.3, 127.8, 126.4, 21.6, 20.2. **HRMS** (ESI/[M+H]<sup>+</sup>) calculated for C<sub>14</sub>H<sub>15</sub>O<sub>2</sub>S: 247.0787, found: 247.0787.

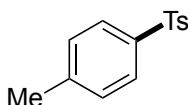

Following the **General Procedure A**, **3e** was isolated as white solid (32.5 mg, 66%).

**<sup>1</sup>H NMR** (400 MHz, CDCl<sub>3</sub>) δ 7.83 (d, *J* = 8.0 Hz, 4H), 7.30 (d, *J* = 8.0 Hz, 4H), 2.41 (s, 6H). **<sup>13</sup>C**

**NMR** (101 MHz, CDCl<sub>3</sub>)  $\delta$  144.0, 139.1, 129.9, 127.6, 21.6. **HRMS** (ESI/[M+H]<sup>+</sup>) calculated for C<sub>14</sub>H<sub>15</sub>O<sub>2</sub>S: 247.0787, found: 247.0785.

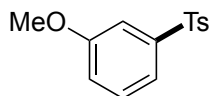

Following the **General Procedure A**, **3f** was isolated as white solid (31.5 mg, 60%).

**<sup>1</sup>H NMR** (400 MHz, CDCl<sub>3</sub>)  $\delta$  7.82 (d, *J* = 8.0 Hz, 2H), 7.50–7.36 (m, 3H), 7.29 (d, *J* = 8.0 Hz, 2H), 7.05 (d, *J* = 8.0 Hz, 1H), 3.83 (s, 3H), 2.39 (s, 3H). **<sup>13</sup>C NMR** (101 MHz, CDCl<sub>3</sub>)  $\delta$  160.1, 144.3, 143.2, 138.6, 130.4, 130.0, 127.8, 119.8, 119.4, 112.2, 55.8, 21.7. **HRMS** (ESI/[M+H]<sup>+</sup>) calculated for C<sub>14</sub>H<sub>15</sub>O<sub>3</sub>S: 263.0736, found: 263.0734.

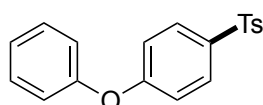

Following the **General Procedure A**, **3g** was isolated as light yellow solid (44.8 mg, 69%).

**<sup>1</sup>H NMR** (400 MHz, CDCl<sub>3</sub>)  $\delta$  7.86 (d, *J* = 8.0 Hz, 2H), 7.81 (d, *J* = 8.0 Hz, 2H), 7.41–7.37 (m, 2H), 7.29 (d, *J* = 8.0 Hz, 2H), 7.23–7.19 (m, 1H), 7.04–6.99 (m, 4H), 2.40 (s, 3H). **<sup>13</sup>C NMR** (101 MHz, CDCl<sub>3</sub>)  $\delta$  162.0, 155.0, 144.0, 139.1, 135.4, 130.2, 129.9, 129.8, 127.5, 125.0, 120.4, 117.7, 21.6. **HRMS** data are in accordance with the literature report.<sup>[10]</sup>

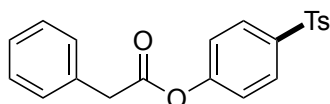

Following the **General Procedure A**, **3h** was isolated as white solid (52.0 mg, 71%).

**<sup>1</sup>H NMR** (400 MHz, CDCl<sub>3</sub>)  $\delta$  8.16 (d, *J* = 8.0 Hz, 2H), 7.98 (d, *J* = 8.0 Hz, 2H), 7.82 (d, *J* = 8.0 Hz, 2H), 7.42–7.34 (m, 5H), 7.30 (d, *J* = 8.0 Hz, 2H), 5.36 (s, 2H), 2.40 (s, 3H). **<sup>13</sup>C NMR** (101 MHz, CDCl<sub>3</sub>)  $\delta$  165.0, 146.1, 144.8, 137.9, 135.5, 134.2, 130.6, 130.2, 128.8, 128.6, 128.4, 128.0, 127.6, 67.5, 21.7. **HRMS** (ESI/[M+H]<sup>+</sup>) calculated for C<sub>21</sub>H<sub>18</sub>O<sub>4</sub>S: 367.0999, found: 367.1027.

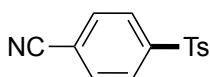

Following the **General Procedure A**, **3i** was isolated (EtOAc/PE: 1/2 to 1/1) as white solid (40.7 mg, 79%).

**<sup>1</sup>H NMR** (400 MHz, CDCl<sub>3</sub>)  $\delta$  8.01 (d, *J* = 8.0 Hz, 2H), 7.83–7.76 (m, 4H), 7.33 (d, *J* = 8.0 Hz, 2H), 2.41 (s, 3H). **<sup>13</sup>C NMR** (101 MHz, CDCl<sub>3</sub>)  $\delta$  146.3, 145.3, 137.1, 133.1, 130.3, 128.2, 128.1, 117.3, 116.7, 21.7; **HRMS** (ESI/[M+H]<sup>+</sup>) calculated for C<sub>14</sub>H<sub>12</sub>O<sub>2</sub>S: 258.0583, found: 258.0582.

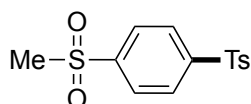

Following the **General Procedure A**, **3j** was isolated as white solid (45.9 mg, 74%).

**<sup>1</sup>H NMR** (400 MHz, CDCl<sub>3</sub>) δ 8.12–8.04 (m, 4H), 7.83 (d, *J* = 8.0 Hz, 2H), 7.33 (d, *J* = 8.0 Hz, 2H), 3.05 (s, 3H), 2.41 (s, 3H). **<sup>13</sup>C NMR** (101 MHz, CDCl<sub>3</sub>) δ 147.3, 145.4, 144.6, 137.2, 130.4, 128.64, 128.56, 128.2, 44.3, 21.7. **HRMS** (ESI/[M+H]<sup>+</sup>) calculated for C<sub>14</sub>H<sub>14</sub>O<sub>4</sub>S<sub>2</sub>: 311.0406, found: 311.0419.

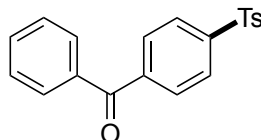

Following the **General Procedure A**, **3k** was isolated as white solid (37.7 mg, 56%).

**<sup>1</sup>H NMR** (400 MHz, CDCl<sub>3</sub>) δ 8.03 (d, *J* = 12.0 Hz, 2H), 7.86 (d, *J* = 8.0 Hz, 4H), 7.76 (d, *J* = 8.0 Hz, 2H), 7.64–7.60 (m, 1H), 7.51–7.47 (m, 2H), 7.33 (d, *J* = 8.0 Hz, 2H), 2.42 (s, 3H). **<sup>13</sup>C NMR** (101 MHz, CDCl<sub>3</sub>) δ 195.3, 145.1, 144.8, 141.5, 137.9, 136.4, 133.3, 130.5, 130.1, 128.6, 128.0, 127.5, 21.7. **HRMS** data are in accordance with the literature report.<sup>[7]</sup>

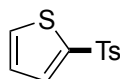

Following the **General Procedure A**, **3l** was isolated as white solid (37.2 mg, 78%).

**<sup>1</sup>H NMR** (400 MHz, CDCl<sub>3</sub>) δ 7.87 (d, *J* = 8.0 Hz, 2H), 7.66 (d, *J* = 4.0 Hz, 1H), 7.62 (d, *J* = 4.0 Hz, 1H), 7.31 (d, *J* = 8.0 Hz, 2H), 7.07–7.05 (m, 1H), 2.40 (s, 3H). **<sup>13</sup>C NMR** (101 MHz, CDCl<sub>3</sub>) δ 144.4, 143.5, 139.1, 133.6, 133.1, 130.0, 127.8, 127.4, 21.6. **HRMS** data are in accordance with the literature report.<sup>[5]</sup>

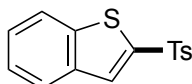

Following the **General Procedure A**, **3m** was isolated as white solid (46.1 mg, 80%).

**<sup>1</sup>H NMR** (400 MHz, CDCl<sub>3</sub>) δ 7.95–7.91 (m, 3H), 7.86 (d, *J* = 8.0 Hz, 1H), 7.81 (d, *J* = 8.0 Hz, 1H), 7.45–7.40 (m, 2H), 7.32 (d, *J* = 8.0 Hz, 2H), 2.40 (s, 3H). **<sup>13</sup>C NMR** (101 MHz, CDCl<sub>3</sub>) δ 144.7, 143.4, 142.7, 138.4, 137.8, 130.0, 127.7, 127.4, 125.9, 125.5, 122.8, 21.7. **HRMS** data are in accordance with the literature report.<sup>[5]</sup>

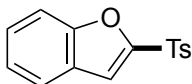

Following the **General Procedure A**, **3n** was isolated as white solid (28.9 mg, 53%).

**<sup>1</sup>H NMR** (400 MHz, CDCl<sub>3</sub>) δ 7.96 (d, *J* = 8.0 Hz, 2H), 7.67 (d, *J* = 8.0 Hz, 1H), 7.54–7.49 (m, 2H), 7.45–7.41 (m, 1H), 7.36–7.29 (m, 3H), 2.42 (s, 3H). **<sup>13</sup>C NMR** (101 MHz, CDCl<sub>3</sub>) δ 156.3, 151.9, 145.3, 136.4, 130.1, 128.3, 127.9, 126.0, 124.3, 123.1, 112.9, 112.5, 21.7. **HRMS** (ESI/[M+H]<sup>+</sup>) calculated for C<sub>15</sub>H<sub>13</sub>O<sub>3</sub>S: 273.0580, found: 273.0577.

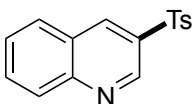

Following the **General Procedure A**, **3o** was isolated as yellow solid (23.2 mg, 41%).

**<sup>1</sup>H NMR** (400 MHz, CDCl<sub>3</sub>) δ 9.28 (s, 1H), 8.83 (s, 1H), 8.18 (d, *J* = 8.0 Hz, 1H), 7.99–7.87 (m, 4H), 7.72–7.68 (m, 1H), 7.35 (d, *J* = 8.0, 2H), 2.42 (s, 3H). **<sup>13</sup>C NMR** (101 MHz, CDCl<sub>3</sub>) δ 149.3, 147.1, 144.9, 138.0, 136.7, 135.1, 132.7, 130.2, 129.6, 129.2, 128.3, 127.9, 126.4, 21.6. **HRMS** (ESI/[M+H]<sup>+</sup>) calculated for C<sub>16</sub>H<sub>14</sub>NO<sub>2</sub>S: 284.0745, found: 284.0747.

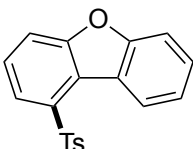

Following the **General Procedure A**, **3p** was isolated as white solid (32.9 mg, 51%).

**<sup>1</sup>H NMR** (400 MHz, CDCl<sub>3</sub>) δ 8.81 (d, *J* = 8.0 Hz, 1H), 8.08 (d, *J* = 8.0 Hz, 1H), 7.89–7.83 (m, 3H), 7.64–7.54 (m, 3H), 7.45–7.41 (m, 1H), 7.27 (d, *J* = 8.0 Hz, 2H), 2.37 (s, 3H). **<sup>13</sup>C NMR** (101 MHz, CDCl<sub>3</sub>) δ 156.8, 144.3, 138.1, 134.6, 129.8, 128.9, 127.3, 126.6, 125.9, 124.5, 123.5, 121.6, 121.1, 117.0, 111.6, 21.6. **HRMS** (ESI/[M+H]<sup>+</sup>) calculated for C<sub>19</sub>H<sub>15</sub>O<sub>3</sub>S: 323.0736, found: 323.0731.

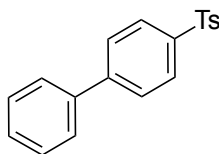

Following the **General Procedure A**, **3q** was isolated as white solid (55.5 mg, 90%).

**<sup>1</sup>H NMR** (400 MHz, CDCl<sub>3</sub>) δ 7.99 (d, *J* = 8.0 Hz, 2H), 7.87 (d, *J* = 8.0 Hz, 2H), 7.69 (d, *J* = 8.0 Hz, 2H), 7.56 (d, *J* = 8.0 Hz, 2H), 7.47–7.40 (m, 3H), 7.31 (d, *J* = 8.0 Hz, 2H), 2.40 (s, 3H). **<sup>13</sup>C NMR** (101 MHz, CDCl<sub>3</sub>) δ 146.0, 144.2, 140.5, 139.2, 138.8, 130.0, 129.07, 128.6, 128.1, 127.9, 127.7, 127.4, 21.6. **HRMS** data are in accordance with the literature report.<sup>[7]</sup>

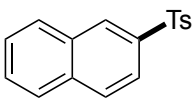

Following the **General Procedure A**, **3r** was isolated as white solid (33.9 mg, 60%).

**<sup>1</sup>H NMR** (400 MHz, CDCl<sub>3</sub>) δ 8.56 (s, 1H), 7.97 (d, *J* = 8.0 Hz, 1H), 7.92–7.83 (m, 5H), 7.64–7.57 (m, 2H), 7.29 (d, *J* = 8.0 Hz, 2H), 2.38 (s, 3H). **<sup>13</sup>C NMR** (101 MHz, CDCl<sub>3</sub>) δ 144.2, 138.8, 138.7, 134.9, 132.2, 130.0, 129.6, 129.4, 129.1, 128.8, 127.9, 127.8, 127.6, 122.6, 21.6. **HRMS** data are in accordance with the literature report.<sup>[6]</sup>

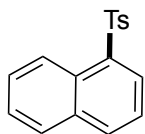

Following the **General Procedure A**, **3s** was isolated as white solid (32.2 mg, 57%).

**<sup>1</sup>H NMR** (400 MHz, CDCl<sub>3</sub>) δ 8.66 (d, *J* = 8.0 Hz, 1H), 8.51 (d, *J* = 8.0 Hz, 1H), 8.09 (d, *J* = 8.0 Hz, 1H), 7.91–7.86 (m, 3H), 7.64–7.54 (m, 4H), 7.27 (d, *J* = 8.0 Hz, 2H), 2.37 (s, 3H). **<sup>13</sup>C NMR** (126 MHz, CDCl<sub>3</sub>) δ 144.0, 138.8, 136.2, 135.0, 134.2, 129.8, 129.0, 128.4, 128.3, 127.5, 126.9, 124.4, 124.4, 21.6. **HRMS** data are in accordance with the literature report.<sup>[6]</sup>

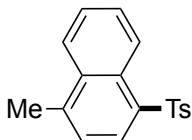

Following the **General Procedure A**, **3t** was isolated as white solid (43.4 mg, 73%).

**<sup>1</sup>H NMR** (400 MHz, CDCl<sub>3</sub>) δ 8.69–8.66 (m, 1H), 8.42 (d, *J* = 8.0 Hz, 1H), 8.07–8.04 (m, 1H), 7.85 (d, *J* = 8.0 Hz, 2H), 7.58–7.56 (m, 2H), 7.47 (d, *J* = 8.0 Hz, 1H), 7.25 (d, *J* = 8.0 Hz, 2H), 2.76 (s, 3H), 2.35 (s, 3H). **<sup>13</sup>C NMR** (126 MHz, CDCl<sub>3</sub>) δ 143.8, 142.4, 139.1, 134.2, 133.3, 129.7, 128.5, 127.8, 127.4, 126.7, 125.3, 125.04, 125.0, 21.5, 20.2. **HRMS** data are in accordance with the literature report.<sup>[7]</sup>

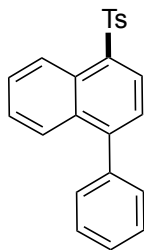

Following the **General Procedure A**, **3u** was isolated as white solid (47.3 mg, 66%).

**<sup>1</sup>H NMR** (400 MHz, CDCl<sub>3</sub>) δ 8.74 (d, *J* = 8.0 Hz, 1H), 8.55 (d, *J* = 8.0 Hz, 1H), 7.91 (d, *J* = 8.0 Hz, 3H), 7.58–7.43 (m, 8H), 7.29 (d, *J* = 8.0 Hz, 2H), 2.37 (s, 3H). **<sup>13</sup>C NMR** (101 MHz, CDCl<sub>3</sub>) δ 147.3, 144.0, 139.4, 138.9, 135.3, 132.6, 129.8, 129.3, 128.9, 128.5, 128.2, 128.0, 127.6, 127.4, 126.8, 125.5, 124.6, 21.6. **HRMS** data are in accordance with the literature report.<sup>[7]</sup>

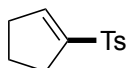

Following the **General Procedure A**, **3v** was isolated as white solid (17.78 mg, 40%).

**<sup>1</sup>H NMR** (400 MHz, CDCl<sub>3</sub>) δ 7.78 (d, *J* = 8.0 Hz, 2H), 7.33 (d, *J* = 8.0 Hz, 2H), 6.71 (s, 1H), 2.53 (t, *J* = 8.0 Hz, 4H), 2.44 (s, 3H), 2.05–1.98 (m, 2H). **<sup>13</sup>C NMR** (101 MHz, CDCl<sub>3</sub>) δ 144.9, 144.3, 142.8, 136.7, 129.8, 128.0, 32.9, 30.8, 23.7, 21.6. **HRMS** data are in accordance with the literature report.<sup>[4]</sup>

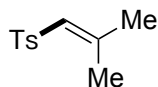

Following the **General Procedure A**, **3w** was isolated as light yellow solid (14.9 mg, 38%).

**<sup>1</sup>H NMR** (400 MHz, CDCl<sub>3</sub>) δ 7.78 (d, *J* = 8.0 Hz, 2H), 7.32 (d, *J* = 8.0 Hz, 2H), 6.17 (s, 1H), 2.43 (s, 3H), 2.14 (s, 3H), 1.87 (s, 3H). **<sup>13</sup>C NMR** (101 MHz, CDCl<sub>3</sub>) δ 153.7, 143.9, 139.5, 129.8, 127.2,



126.6, 27.1, 21.6, 19.2. **HRMS** data are in accordance with the literature report.<sup>[8]</sup>

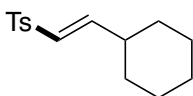

Following the **General Procedure A**, **3x** was isolated as white solid (30.1 mg, 57%).

**<sup>1</sup>H NMR** (400 MHz, CDCl<sub>3</sub>) δ 7.74 (d, *J* = 8.0 Hz, 2H), 7.31 (d, *J* = 8.0 Hz, 2H), 6.93-6.88 (m 1H), 6.22 (d, *J* = 16.0 Hz, 1H), 2.42 (s, 3H), 1.76-1.63 (m 6H), 1.25-1.10 (m, 5H). **<sup>13</sup>C NMR** (101 MHz, CDCl<sub>3</sub>) δ 151.2, 144.1, 137.9, 129.9, 128.6, 127.6, 39.9, 31.3, 25.7, 25.6, 21.6. **HRMS** data are in accordance with the literature report.<sup>[9]</sup>

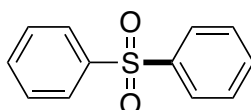

Following the **General Procedure B**, **4a** was isolated as white solid (26.2 mg, 60%).

**<sup>1</sup>H NMR** (400 MHz, CDCl<sub>3</sub>) δ 7.96–7.94 (m, 4H), 7.58–7.49 (m, 6H). **<sup>13</sup>C NMR** (101 MHz, CDCl<sub>3</sub>) δ 141.6, 133.2, 129.3, 127.7. **HRMS** (ESI/[M+H]<sup>+</sup>) calculated for C<sub>12</sub>H<sub>10</sub>O<sub>2</sub>S: 219.0474, found: 219.0457.

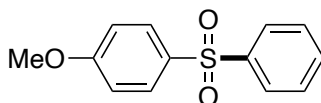

Following the **General Procedure B**, **4b** was isolated as white solid (27.3 mg, 55%).

**<sup>1</sup>H NMR** (400 MHz, CDCl<sub>3</sub>) δ 7.92–7.86 (m, 4H), 7.54–7.46 (m, 3H), 6.97–6.94 (m, 2H), 3.83 (s, 3H). **<sup>13</sup>C NMR** (101 MHz, CDCl<sub>3</sub>) δ 163.4, 142.4, 133.1, 132.8, 129.9, 129.2, 127.3, 114.5, 55.7. **HRMS** (ESI/[M+H]<sup>+</sup>) calculated for C<sub>13</sub>H<sub>12</sub>O<sub>3</sub>S: 249.0580, found: 249.0590.

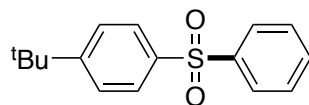

Following the **General Procedure B**, **4c** was isolated as white solid (28.1 mg, 51%).

**<sup>1</sup>H NMR** (400 MHz, CDCl<sub>3</sub>) δ 7.95 (d, *J* = 8.0 Hz, 2H), 7.86 (d, *J* = 8.0 Hz, 2H), 7.57–7.53 (m, 1H), 7.51–7.47 (m, 4H), 1.30 (s, 9H). **<sup>13</sup>C NMR** (101 MHz, CDCl<sub>3</sub>) δ 157.1, 141.9, 138.5, 133.0, 129.2, 127.6, 127.5, 126.3, 35.2, 31.0. **HRMS** (ESI/[M+H]<sup>+</sup>) calculated for C<sub>16</sub>H<sub>18</sub>O<sub>2</sub>S: 275.1100, found: 275.1076.

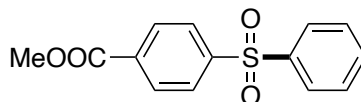

Following the **General Procedure B**, **4d** was isolated as white solid (35.4 mg, 64%).

**<sup>1</sup>H NMR** (400 MHz, CDCl<sub>3</sub>) δ 8.17 (d, *J* = 8.0 Hz, 2H), 8.03 (d, *J* = 8.0 Hz, 2H), 7.97 (d, *J* = 8.0 Hz, 2H), 7.63–7.60 (m, 1H), 7.56–7.52 (m, 2H), 3.95 (s, 3H). **<sup>13</sup>C NMR** (101 MHz, CDCl<sub>3</sub>) δ 165.5,

145.5, 140.8, 134.3, 133.7, 130.5, 129.5, 127.9, 127.7, 52.7. **HRMS** (ESI/[M+H]<sup>+</sup>) calculated for C<sub>14</sub>H<sub>13</sub>O<sub>4</sub>S: 277.0529, found: 277.0525.

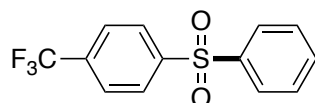

Following the **General Procedure B**, **4e** was isolated as white solid (40.8 mg, 71%).

**<sup>1</sup>H NMR** (400 MHz, CDCl<sub>3</sub>) δ 8.07 (d, *J* = 8.0 Hz, 2H), 7.96 (d, *J* = 8.0 Hz, 2H), 7.76 (d, *J* = 8.0 Hz, 2H), 7.63–7.52 (m, 3H). **<sup>13</sup>C NMR** (101 MHz, CDCl<sub>3</sub>) δ 145.2, 140.6, 134.9 (q, *J* = 32.8 Hz), 133.8, 129.6, 128.2, 127.9, 126.5, 122.0 (q, *J* = 274.7 Hz). **<sup>19</sup>F NMR** (377 MHz, CDCl<sub>3</sub>) δ 63.20. **HRMS** (ESI/[M+Na]<sup>+</sup>) calculated for C<sub>13</sub>H<sub>9</sub>O<sub>2</sub>F<sub>3</sub>S: 309.0168, found: 309.0153.

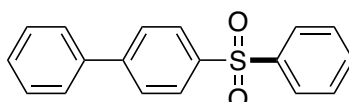

Following the **General Procedure B**, **4f** was isolated as white solid (40.0 mg, 68%).

**<sup>1</sup>H NMR** (400 MHz, CDCl<sub>3</sub>) δ 8.05–8.01 (m, 4H), 7.72 (d, *J* = 12.0 Hz, 2H), 7.59–7.53 (m, 5H), 7.50–7.41 (m, 3H). **<sup>13</sup>C NMR** (101 MHz, CDCl<sub>3</sub>) δ 146.2, 141.7, 140.1, 139.2, 133.2, 129.4, 129.1, 128.6, 128.2, 128.0, 127.7, 127.4. **HRMS** data are in accordance with the literature report.<sup>[10]</sup>

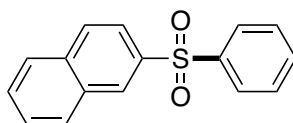

Following the **General Procedure B**, **4g** was isolated as white solid (38.6 mg, 72%).

**<sup>1</sup>H NMR** (400 MHz, CDCl<sub>3</sub>) δ 8.59 (s, 1H), 8.02–7.85 (m, 6H), 7.65–7.58 (m, 2H), 7.55–7.48 (m, 3H). **<sup>13</sup>C NMR** (101 MHz, CDCl<sub>3</sub>) δ 141.6, 138.4, 135.0, 133.2, 132.2, 129.7, 129.4, 129.3, 129.2, 129.1, 127.9, 127.7, 127.7, 122.7. **HRMS** data are in accordance with the literature report.<sup>[11]</sup>

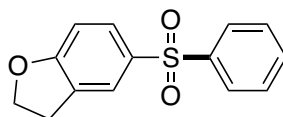

Following the **General Procedure B**, **4h** was isolated (EtOAc/PE: 1/2 to 1/1) as white solid (38.5 mg, 74%).

**<sup>1</sup>H NMR** (400 MHz, CDCl<sub>3</sub>) δ 7.93 (d, *J* = 8.0 Hz, 2H), 7.76 (d, *J* = 4.0 Hz, 2H), 7.57–7.48 (m, 3H), 6.84 (d, *J* = 8.0 Hz, 1H), 4.66 (t, *J* = 8.0 Hz, 2H), 3.25 (t, *J* = 8.0 Hz, 2H). **<sup>13</sup>C NMR** (101 MHz, CDCl<sub>3</sub>) δ 164.4, 142.5, 133.0, 132.8, 129.5, 129.2, 128.7, 127.2, 125.0, 109.8, 72.4, 29.0. **HRMS** data are in accordance with the literature report.<sup>[11]</sup>

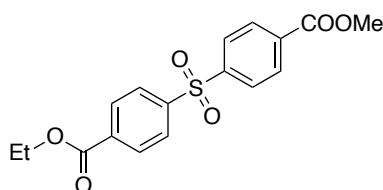

According to tandem one-pot reaction, **4j** was isolated as white solid (44.6 mg, 64%).

**<sup>1</sup>H NMR** (400 MHz, CDCl<sub>3</sub>) δ 8.19–8.16 (m, 4H), 8.03 (d, *J* = 8.0 Hz, 4H), 4.40 (q, *J* = 8.0 Hz, 2H), 3.95 (s, 3H), 1.40 (t, *J* = 8.0 Hz, 3H). **<sup>13</sup>C NMR** (101 MHz, CDCl<sub>3</sub>) δ 165.3, 164.8, 144.8, 144.6, 135.1, 134.7, 130.6, 130.5, 127.9, 61.8, 52.7, 14.2. **HRMS** (ESI/[M+H]<sup>+</sup>) calculated for C<sub>17</sub>H<sub>16</sub>O<sub>6</sub>S: 349.0740, found: 349.0734.

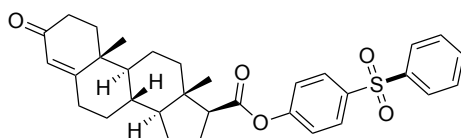

According to tandem one-pot reaction, **4k** was isolated (EtOAc/PE: 1/1 to 2/1) as colorless liquid (55.3 mg, 52%).

**<sup>1</sup>H NMR** (400 MHz, CDCl<sub>3</sub>) δ 7.96–7.91 (m, 4H), 7.56–7.47 (m, 3H), 7.22 (d, *J* = 8.0 Hz, 2H), 5.73 (s, 1H), 3.86 (s, 1H), 2.63–2.58 (m, 1H), 2.42–2.36 (m, 2H), 2.30–2.26 (m, 1H), 2.21–2.12 (m, 2H), 2.04–2.01 (m, 1H), 1.95–1.85 (m, 2H), 1.79–1.71 (m, 2H), 1.64–1.54 (m, 2H), 1.47–1.39 (m, 2H), 1.27–1.23 (m, 2H), 1.18 (s, 3H), 1.08–0.96 (m, 2H), 0.82 (s, 3H). **<sup>13</sup>C NMR** (101 MHz, CDCl<sub>3</sub>) δ 199.7, 171.8, 171.1, 154.5, 141.4, 138.7, 133.9, 133.3, 129.4, 127.6, 124.0, 122.6, 55.4, 55.1, 53.6, 44.6, 38.6, 38.2, 35.7, 33.9, 32.8, 31.9, 29.7, 24.4, 23.6, 20.9, 17.4, 13.7. **HRMS** data are in accordance with the literature report.<sup>[6]</sup>

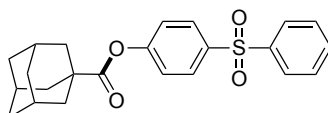

According to tandem one-pot reactions, **4l** was isolated as white solid (44.4 mg, 56%).

**<sup>1</sup>H NMR** (400 MHz, CDCl<sub>3</sub>) δ 7.96–7.92 (m, 4H), 7.58–7.48 (m, 3H), 7.19 (d, *J* = 8.0 Hz, 2H), 2.08–2.02 (m, 9H), 1.79–1.72 (m, 6H). **<sup>13</sup>C NMR** (101 MHz, CDCl<sub>3</sub>) δ 175.4, 154.9, 141.5, 138.5, 133.3, 129.4, 127.6, 122.6, 41.2, 38.6, 36.3, 27.8. **HRMS** data are in accordance with the literature report.<sup>[6]</sup>

## 7. Spectra for Described Compounds

(3a)

### <sup>1</sup>H Spectra

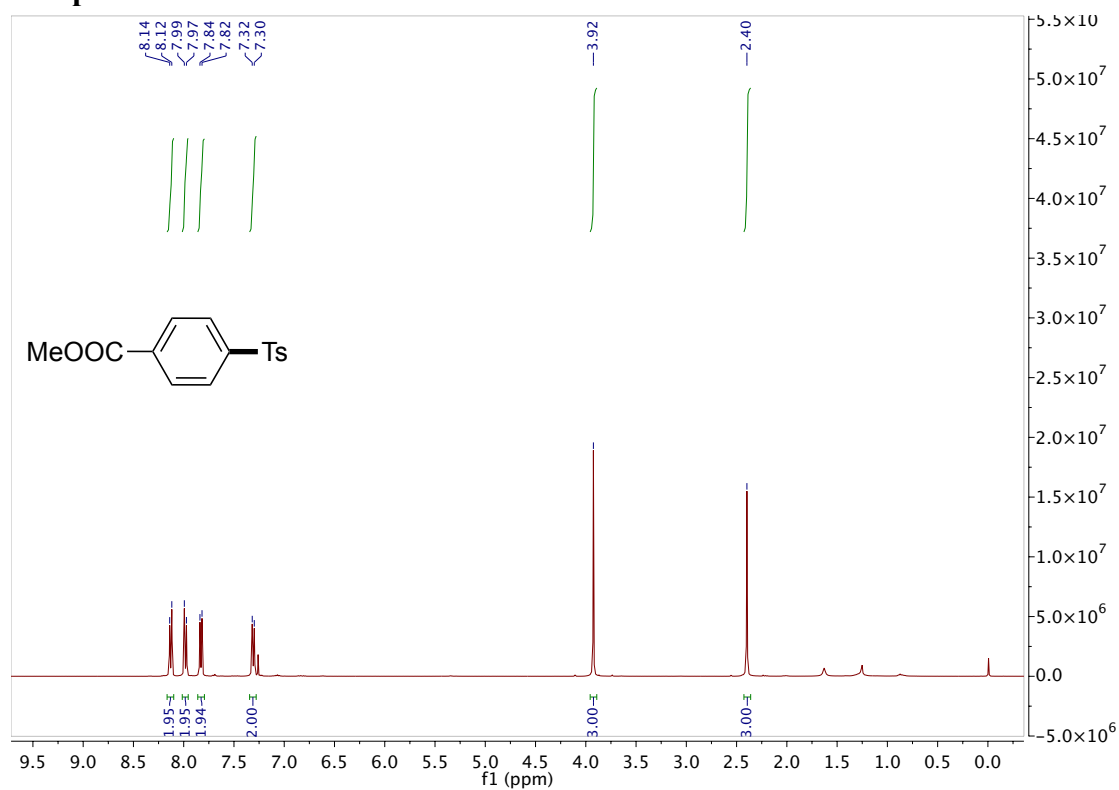

### <sup>13</sup>C Spectra

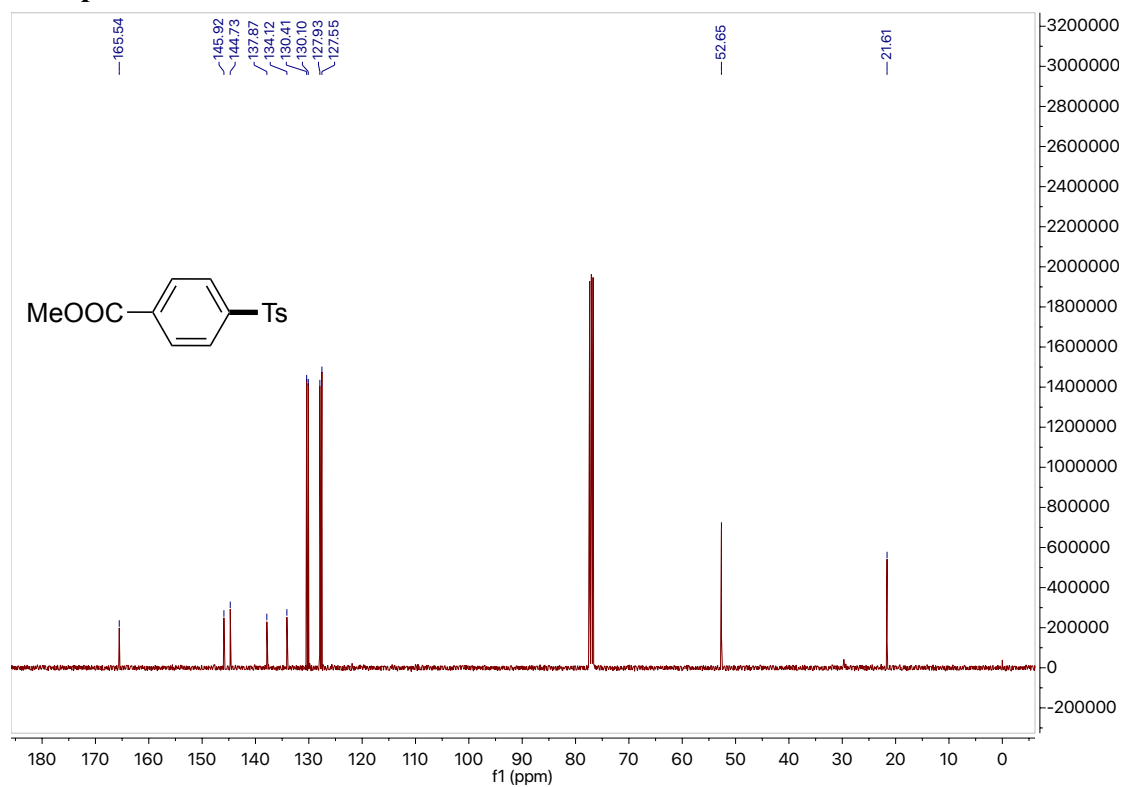

(3b)  
<sup>1</sup>H Spectra

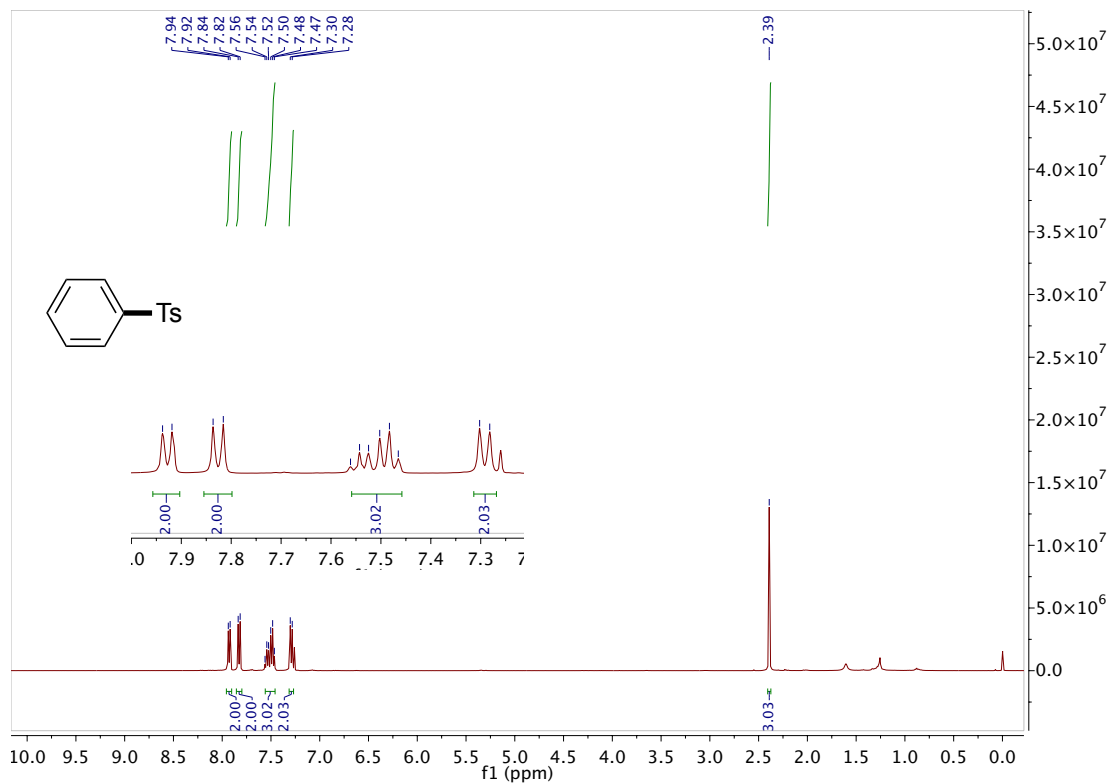

<sup>13</sup>C Spectra

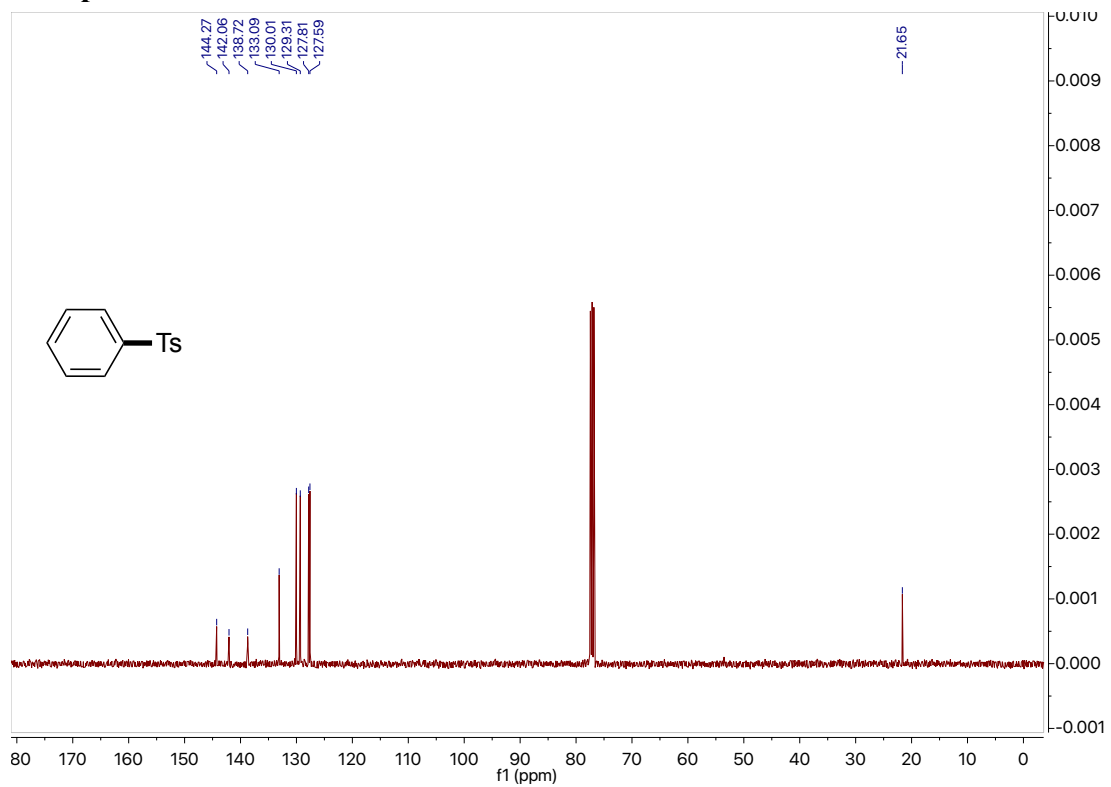

(3c)  
<sup>1</sup>H Spectra

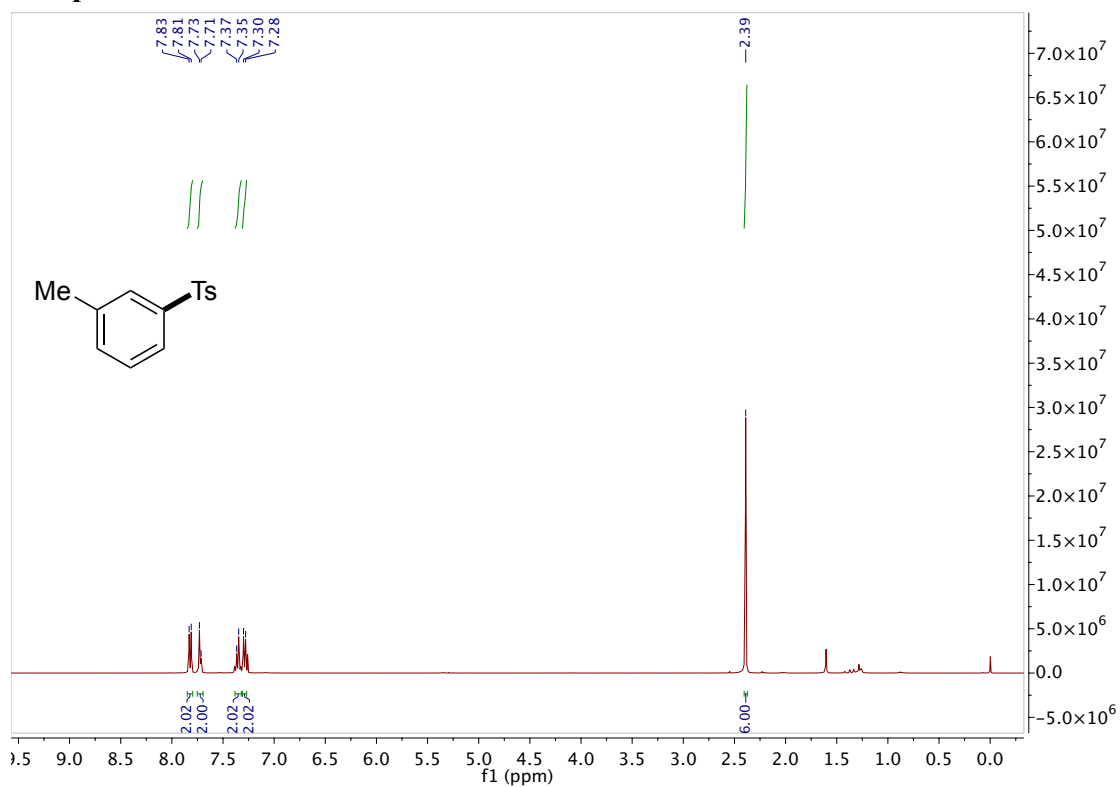

<sup>13</sup>C Spectra

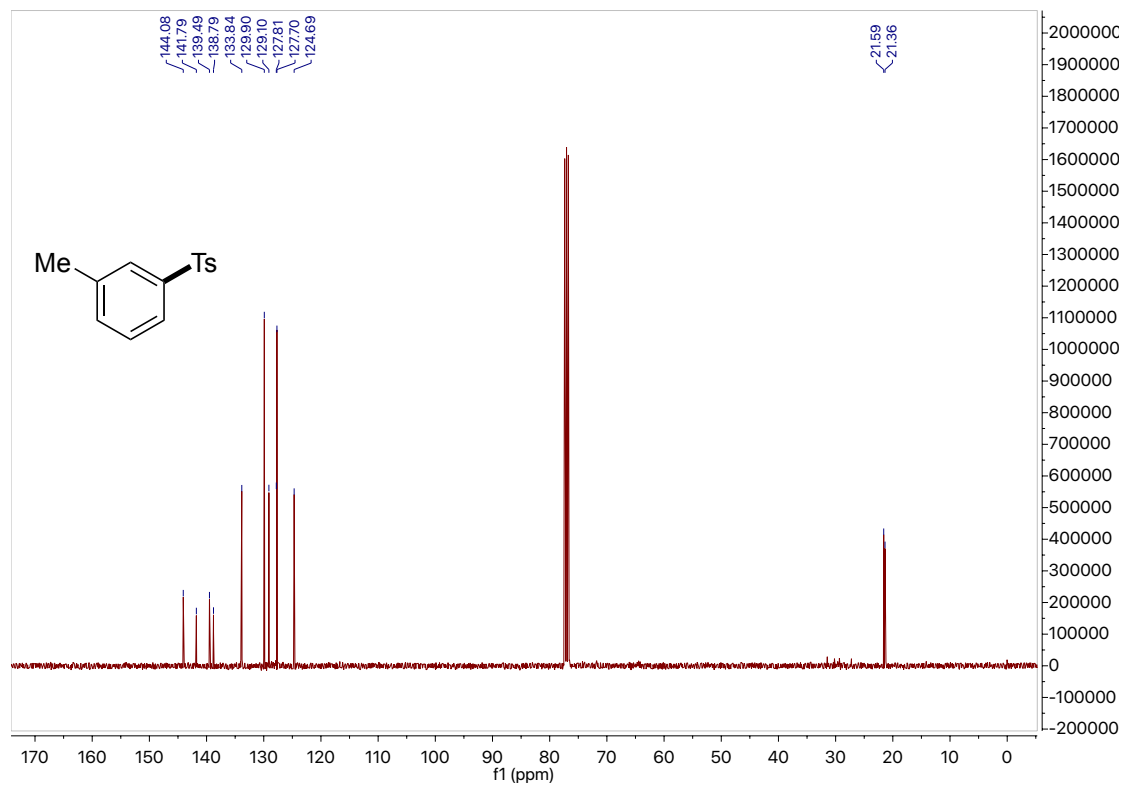

**(3d)**  
**<sup>1</sup>H Spectra**

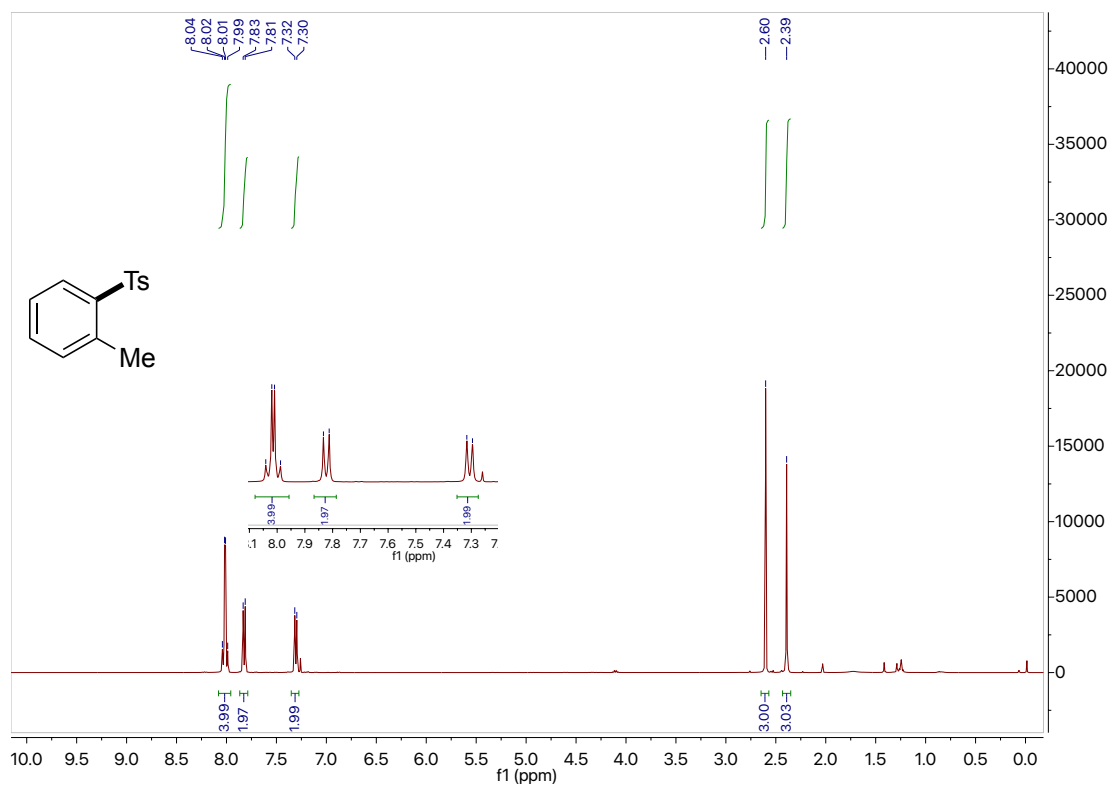

**<sup>13</sup>C Spectra**

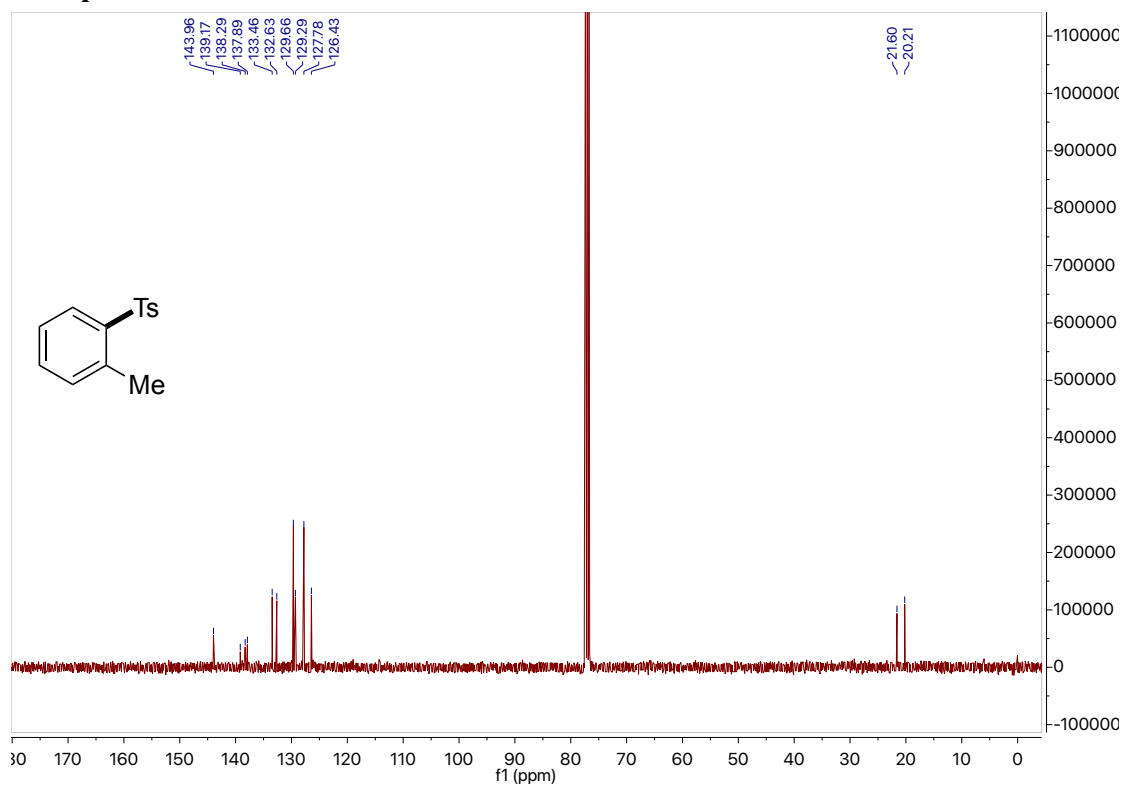

(3e)  
<sup>1</sup>H Spectra

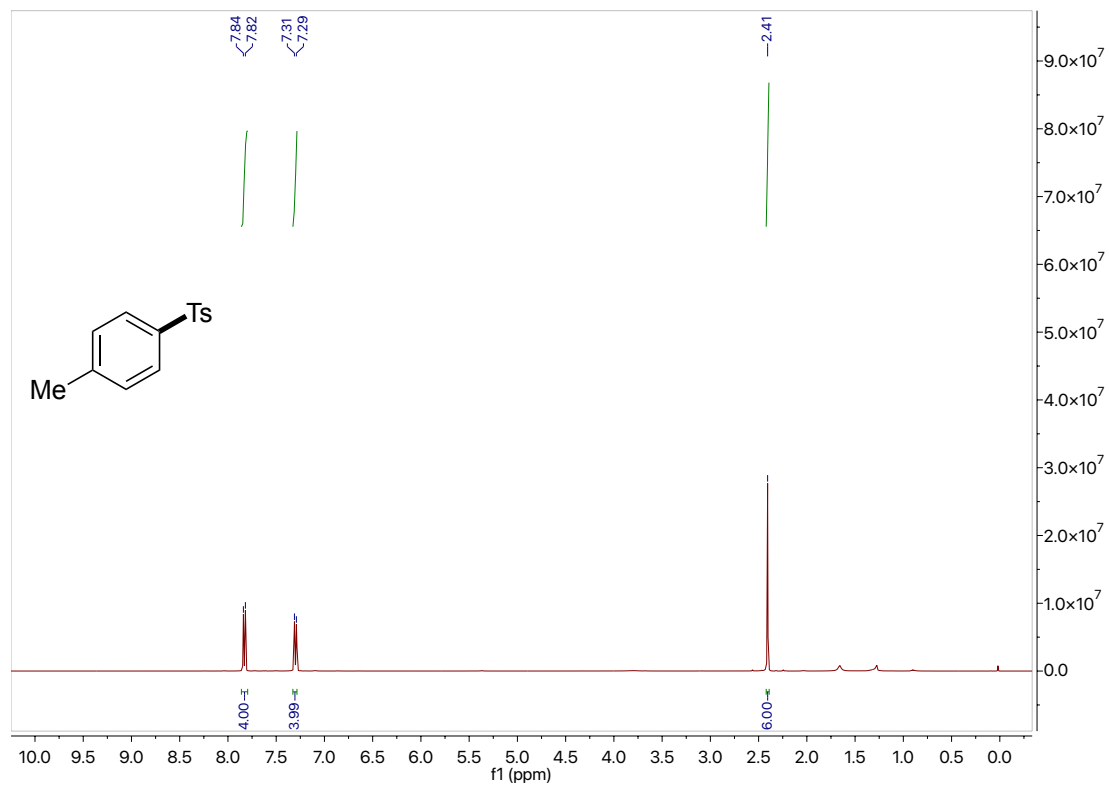

<sup>13</sup>C Spectra

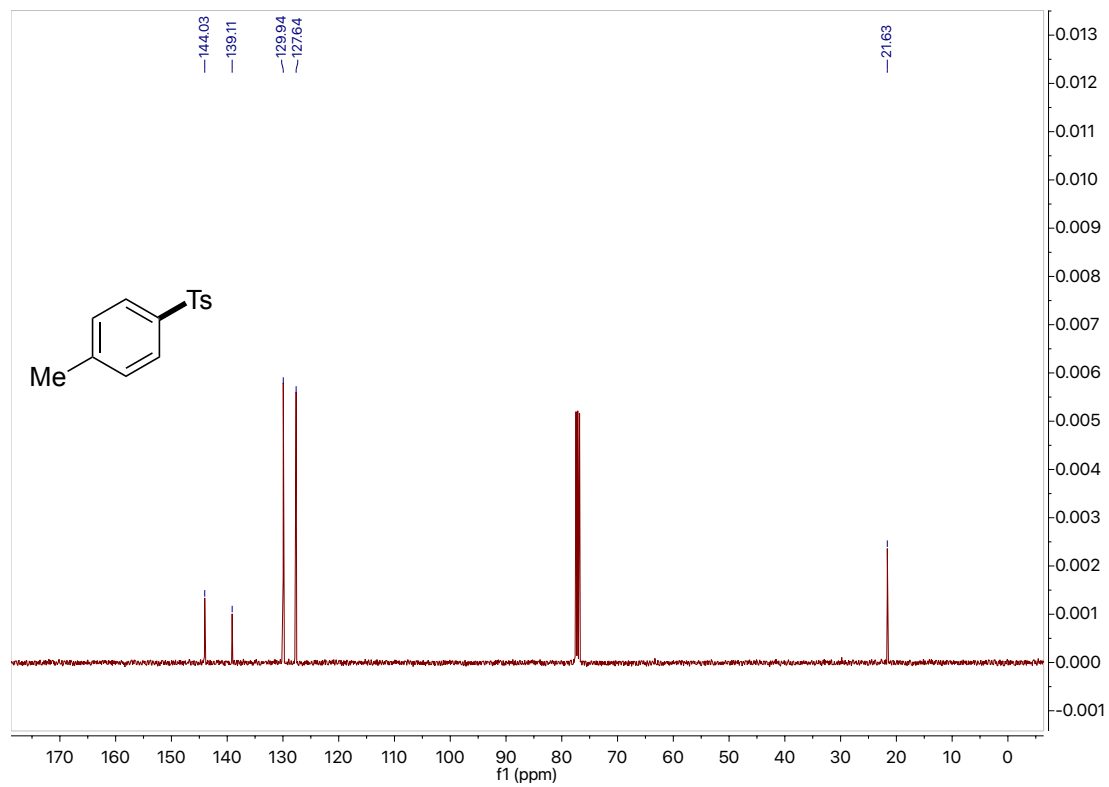



(3f)  
<sup>1</sup>H Spectra

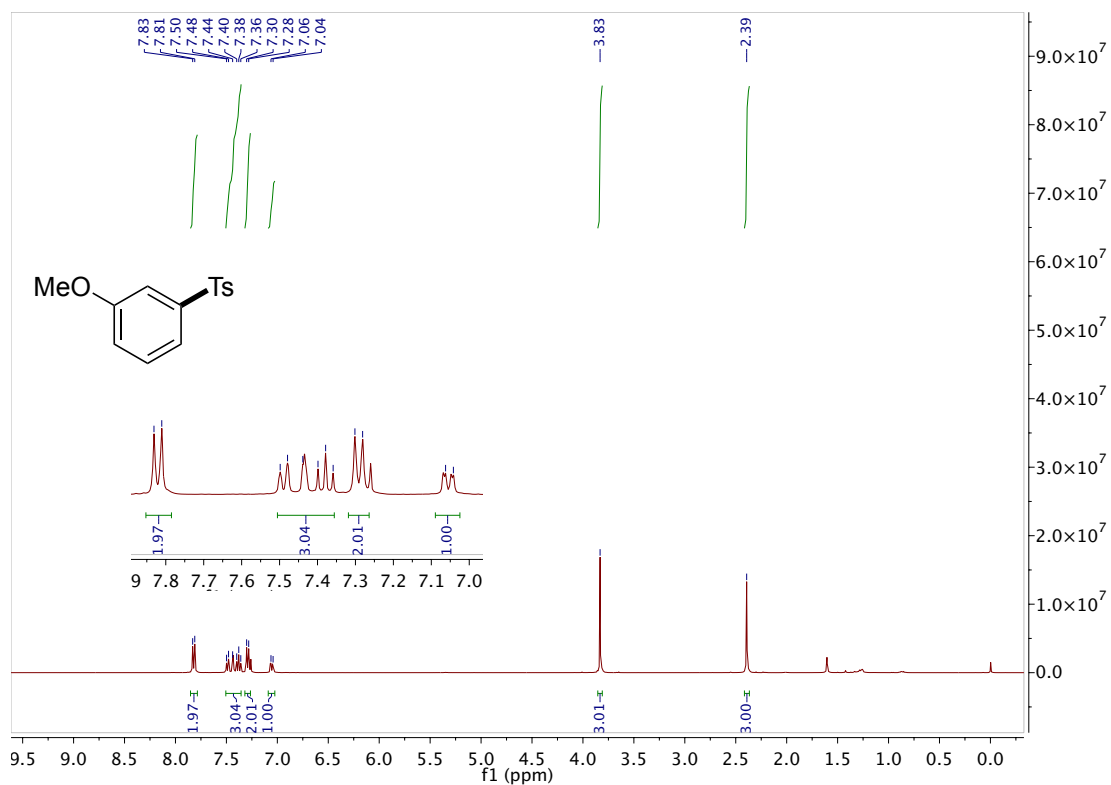

<sup>13</sup>C Spectra

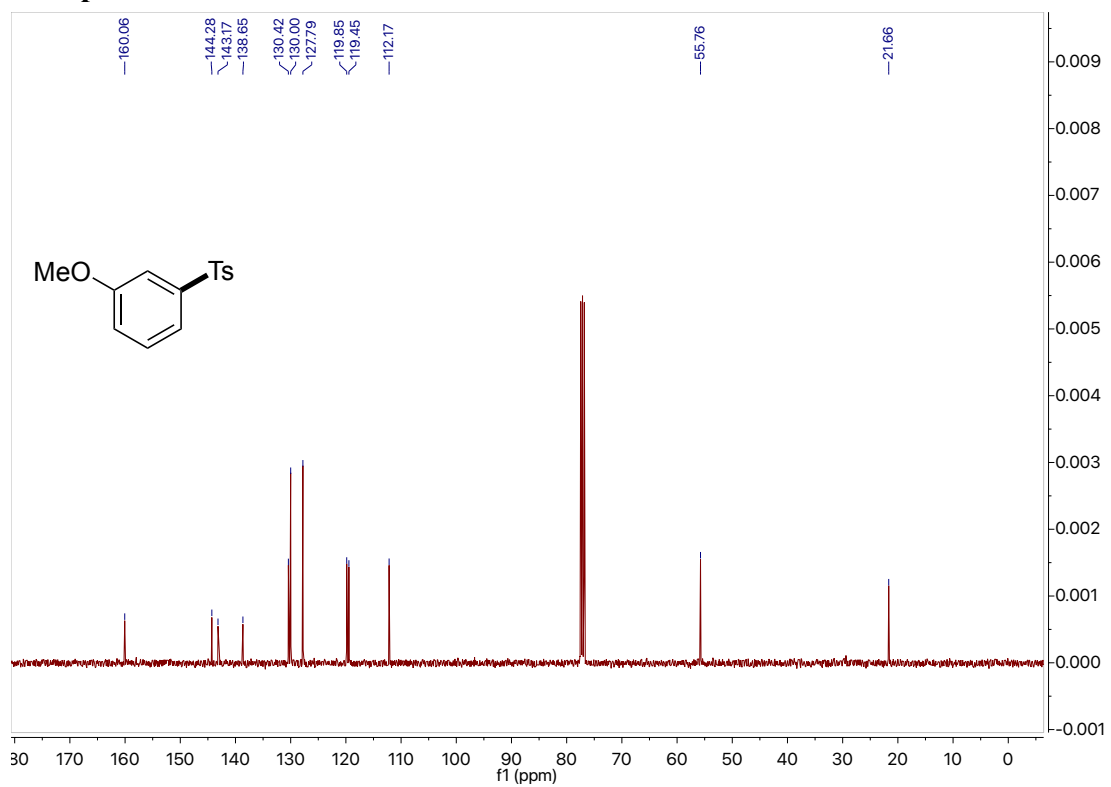

**(3g)**  
**<sup>1</sup>H Spectra**

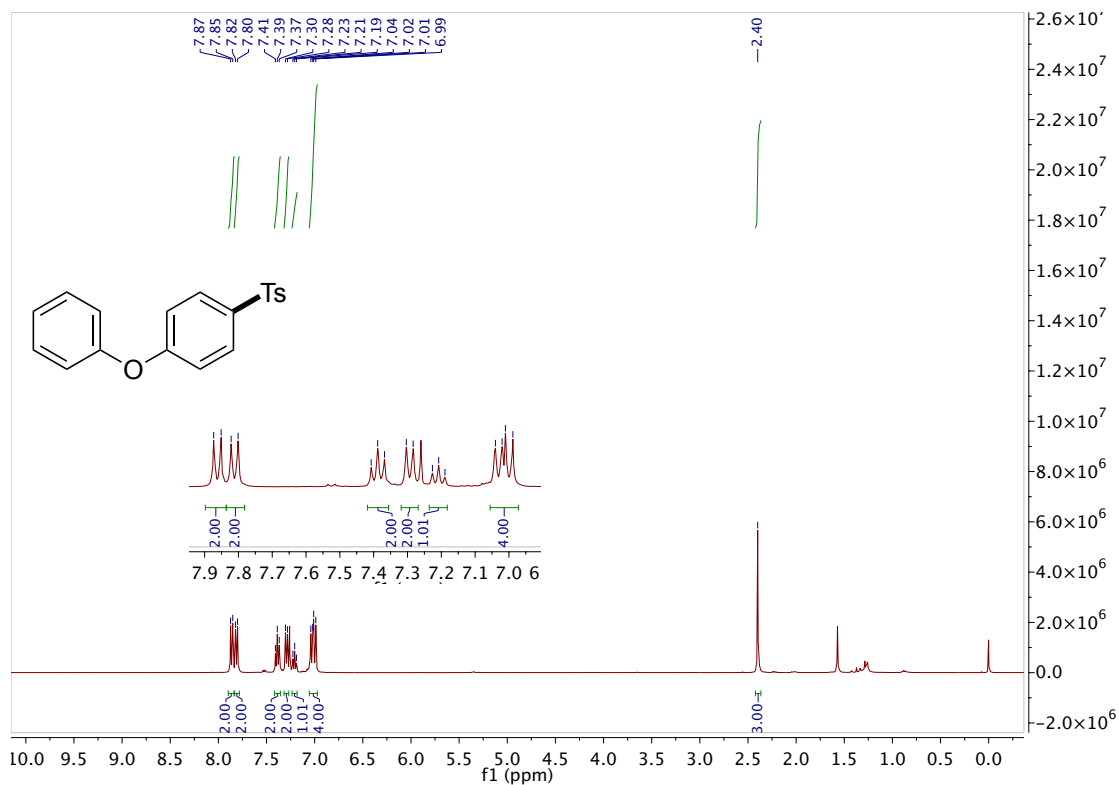

**<sup>13</sup>C Spectra**

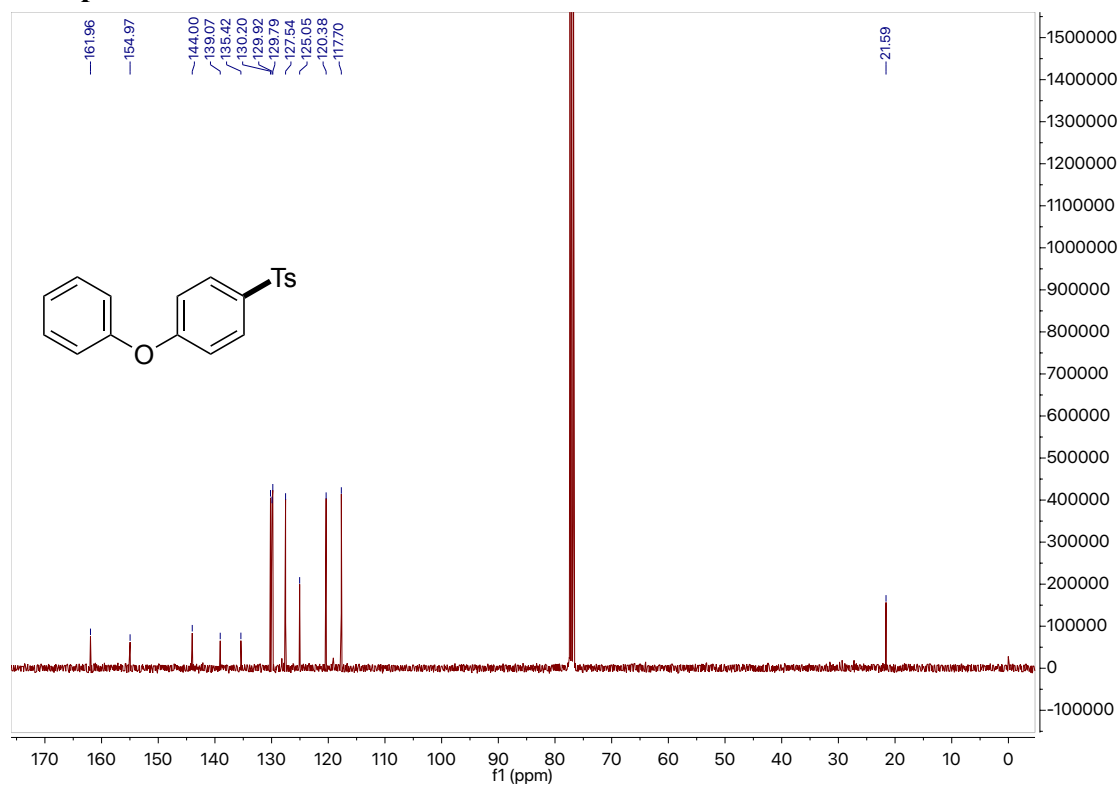

**(3h)**  
**<sup>1</sup>H Spectra**

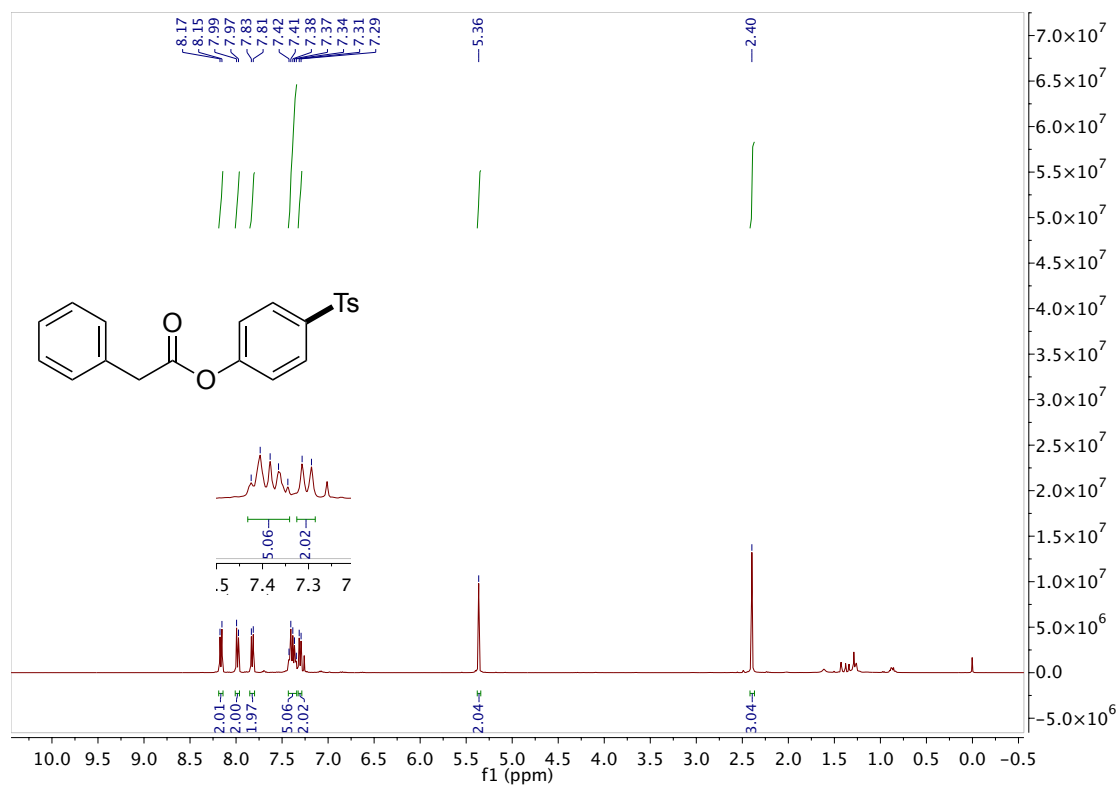

**<sup>13</sup>C Spectra**

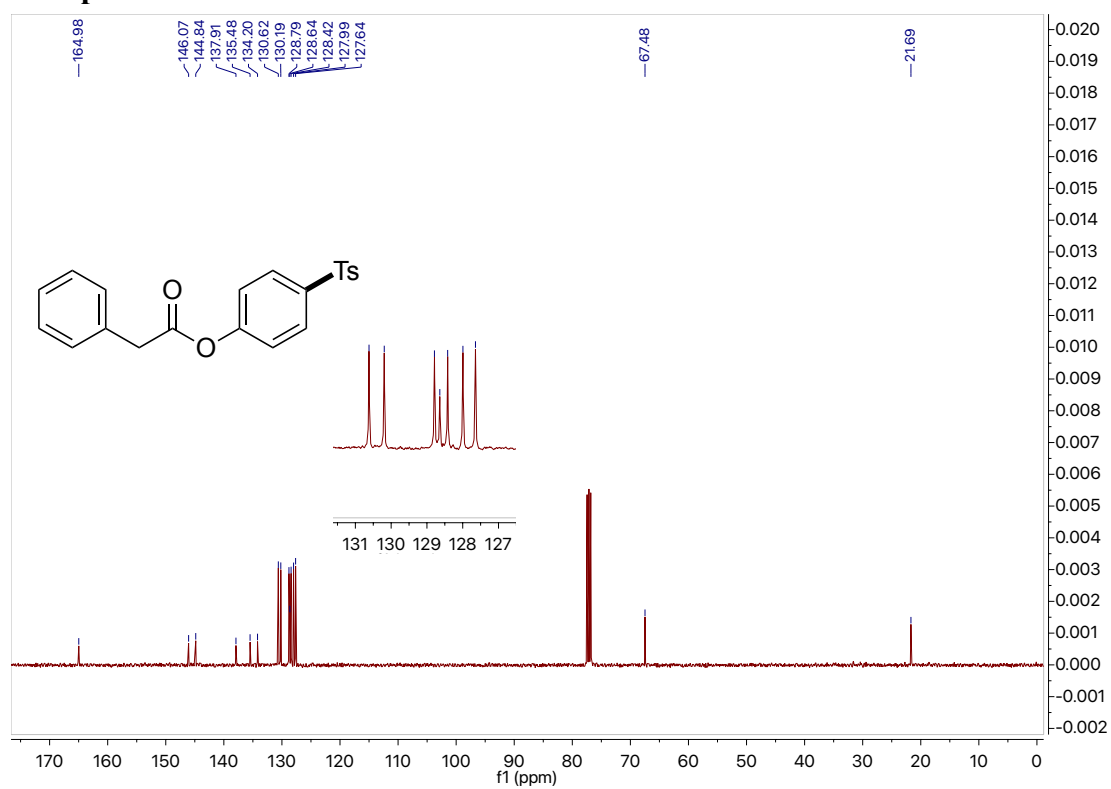

(3i)  
**<sup>1</sup>H Spectra**

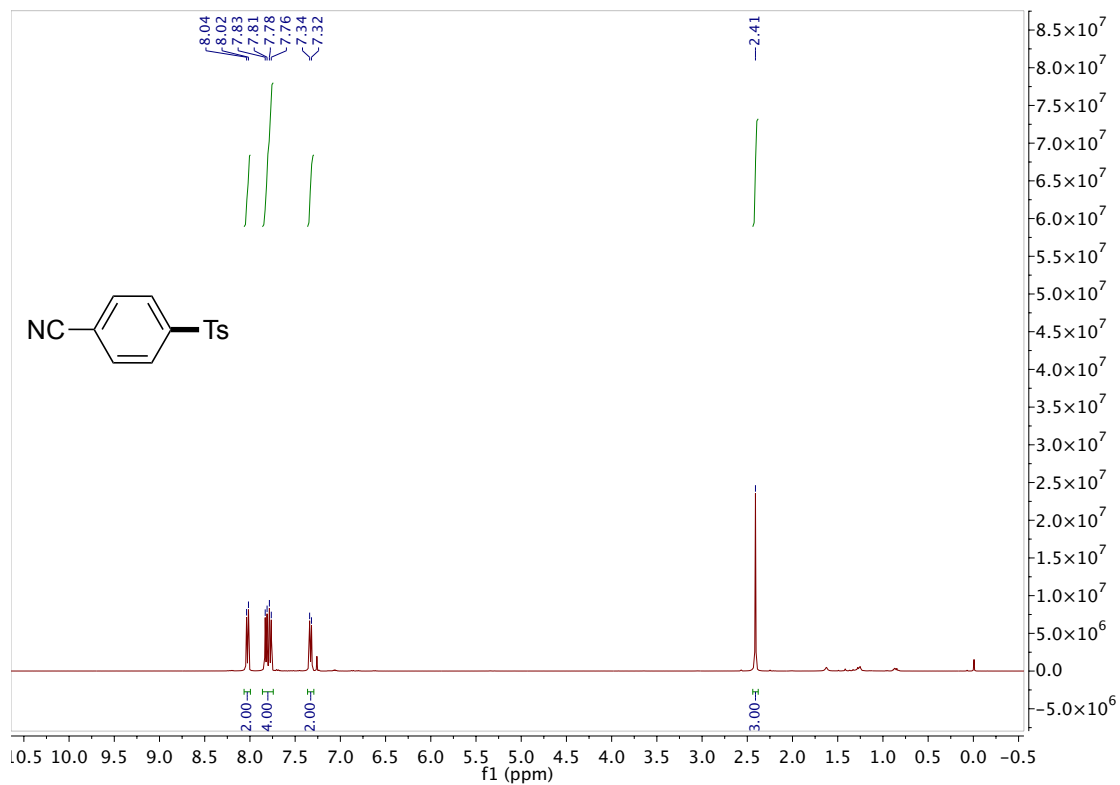

**<sup>13</sup>C Spectra**

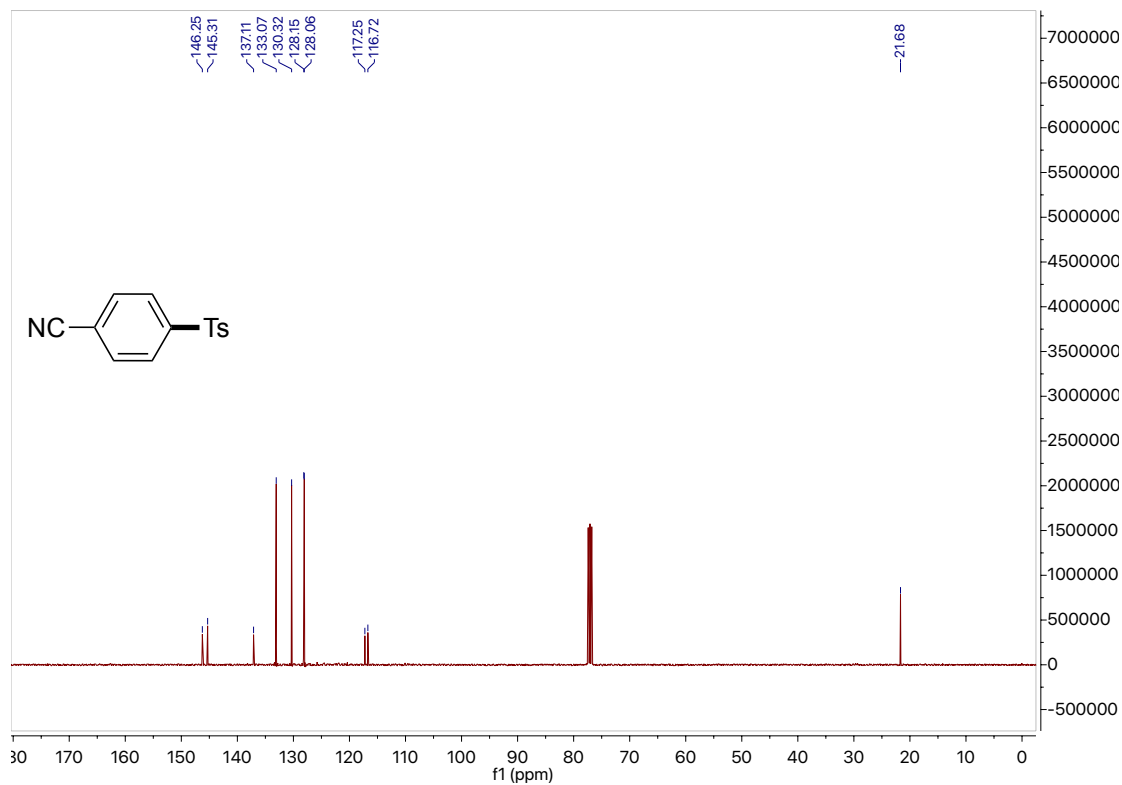

(3)  
**<sup>1</sup>H Spectra**

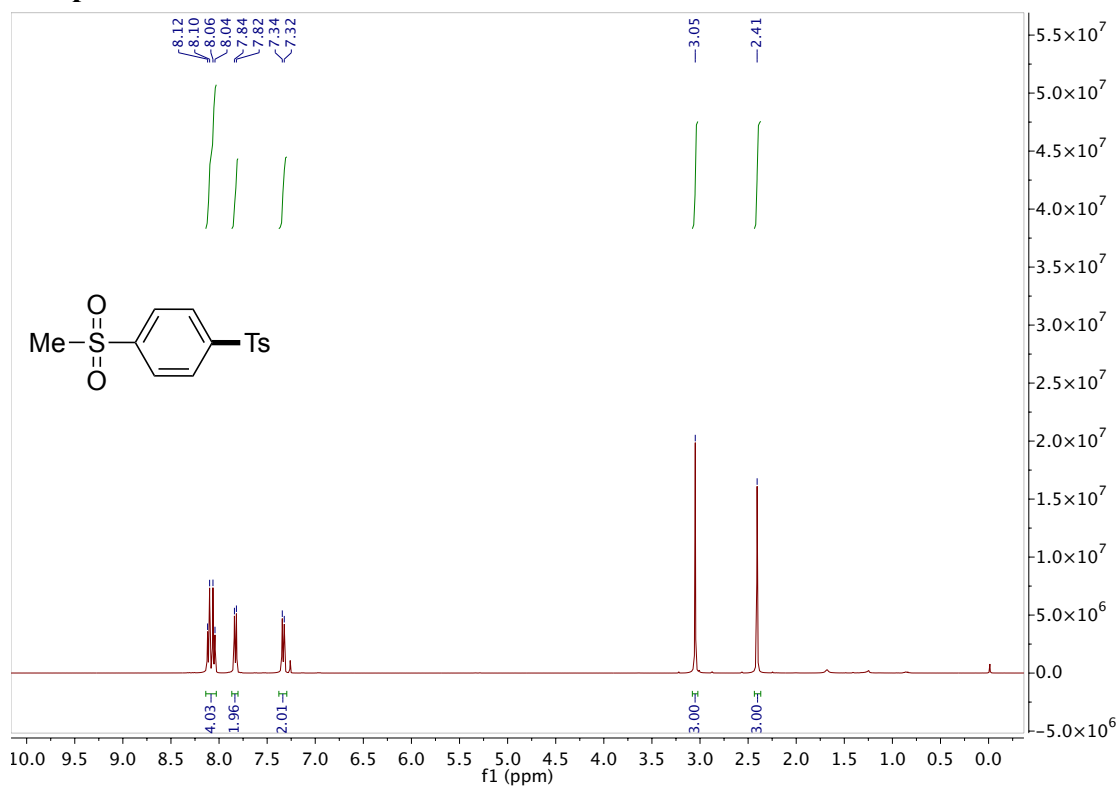

**<sup>13</sup>C Spectra**

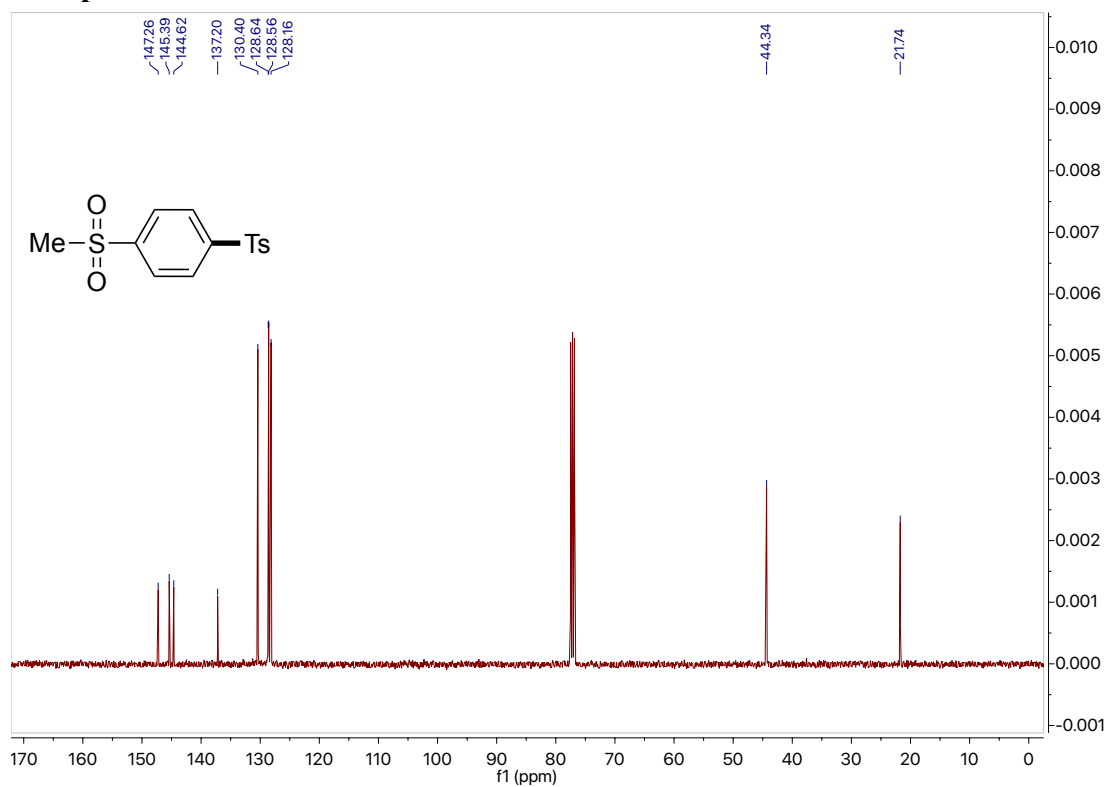

**(3k)**  
**<sup>1</sup>H Spectra**

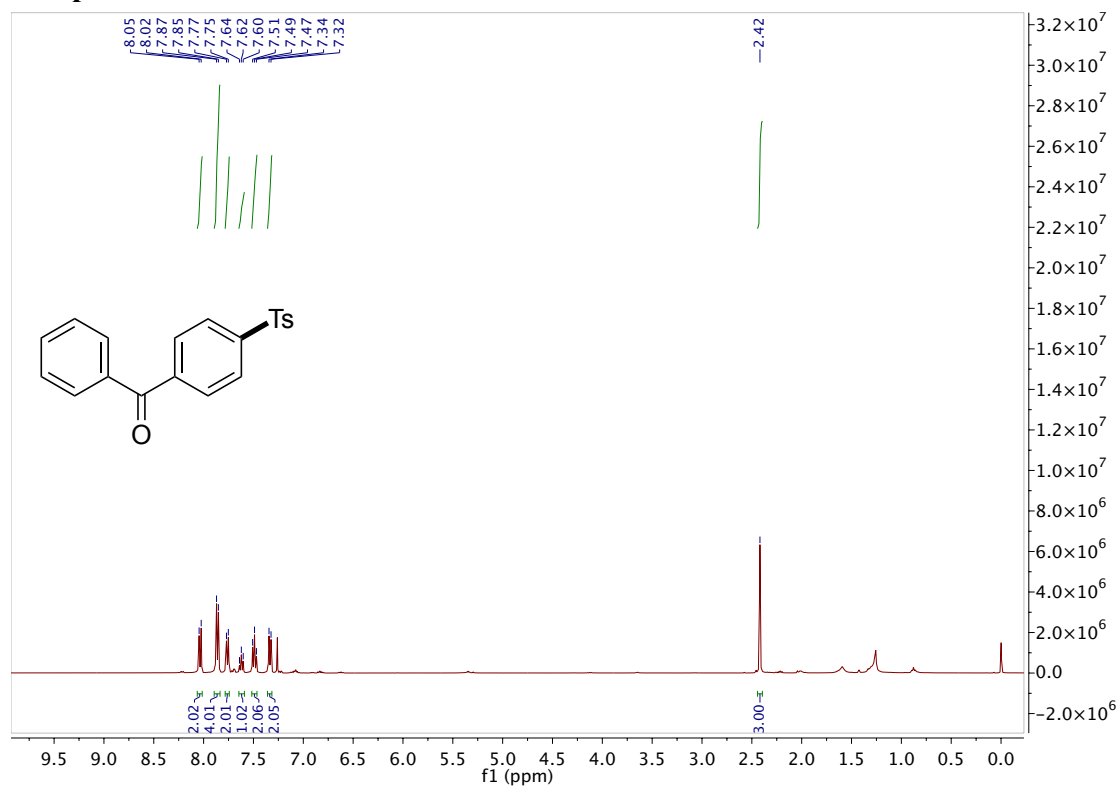

**<sup>13</sup>C Spectra**

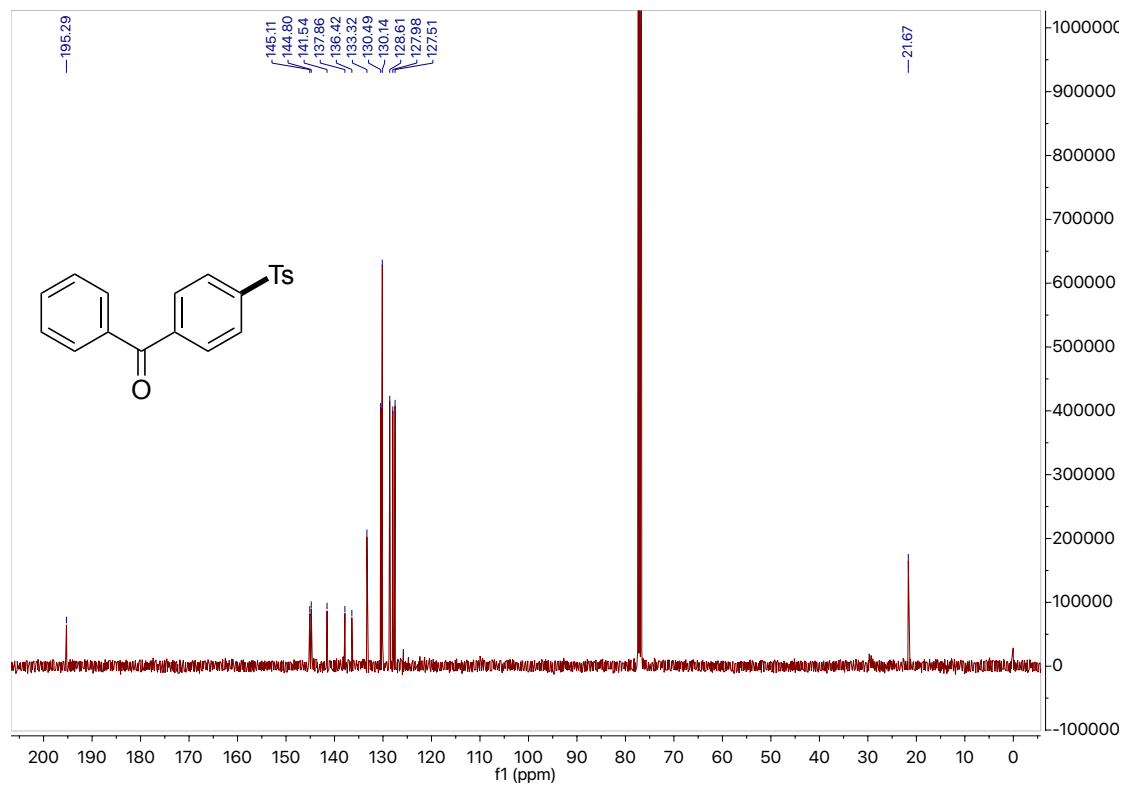

(31)  
**<sup>1</sup>H Spectra**

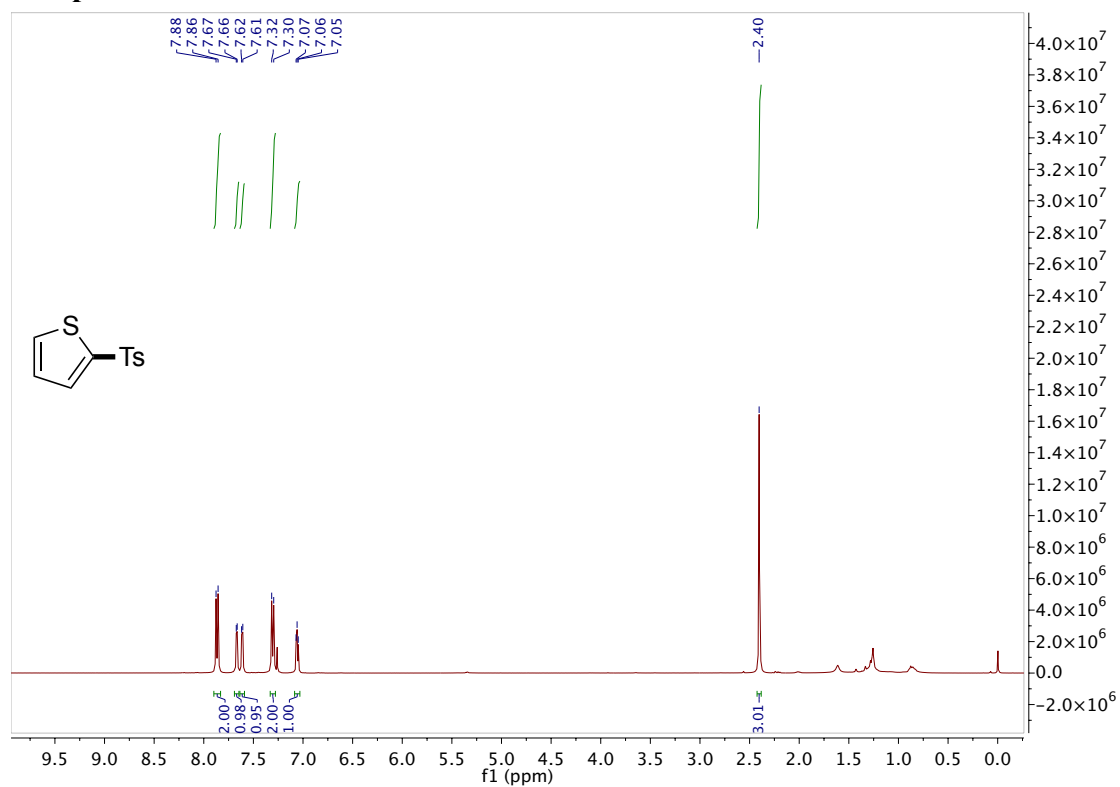

**<sup>13</sup>C Spectra**

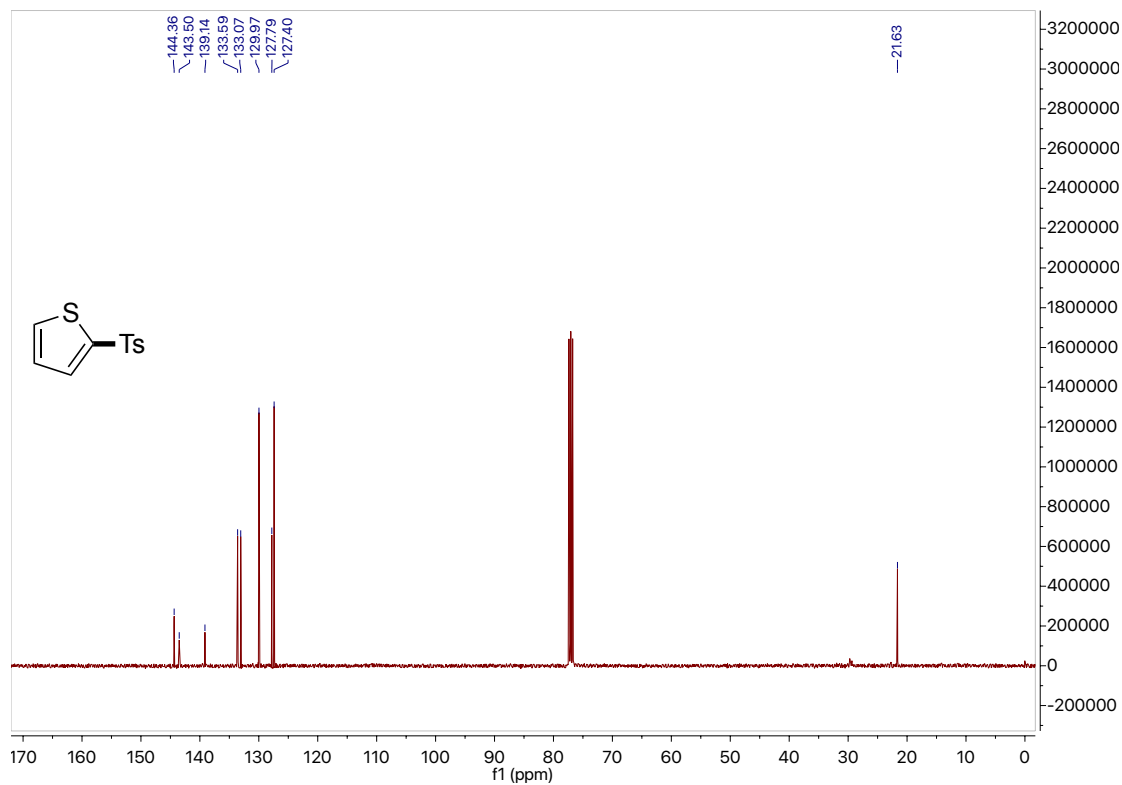

**(3m)**  
**<sup>1</sup>H Spectra**

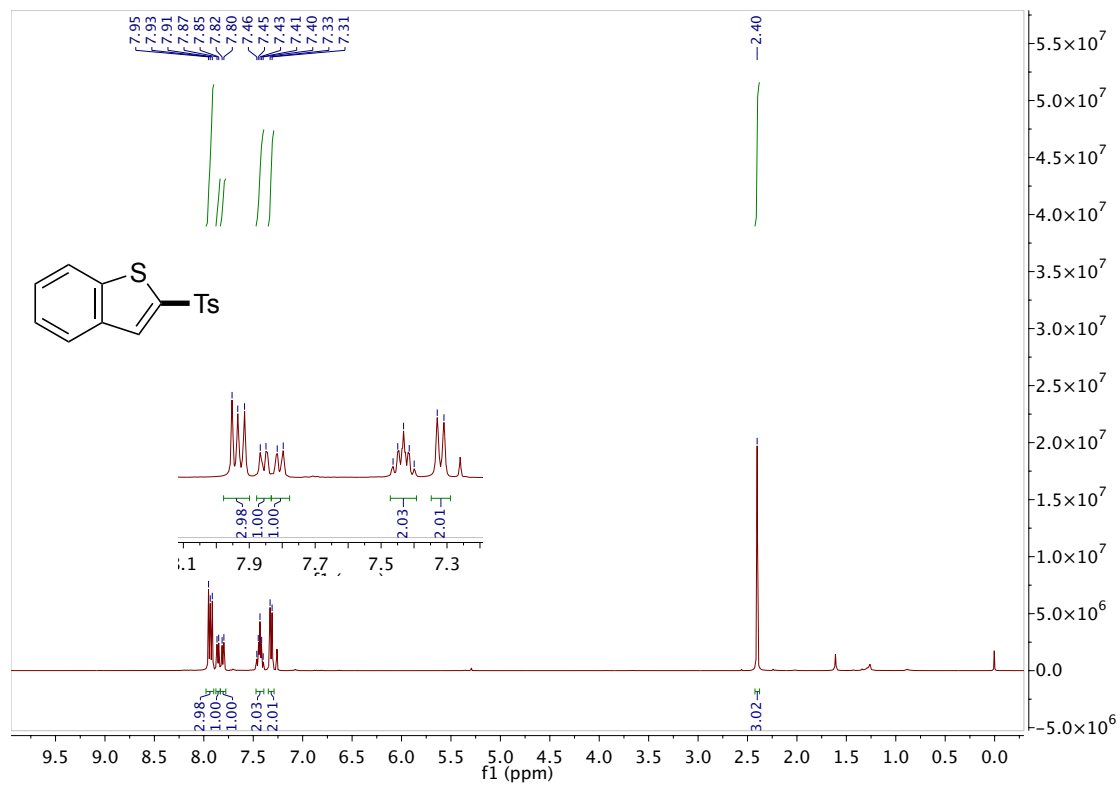

**<sup>13</sup>C Spectra**

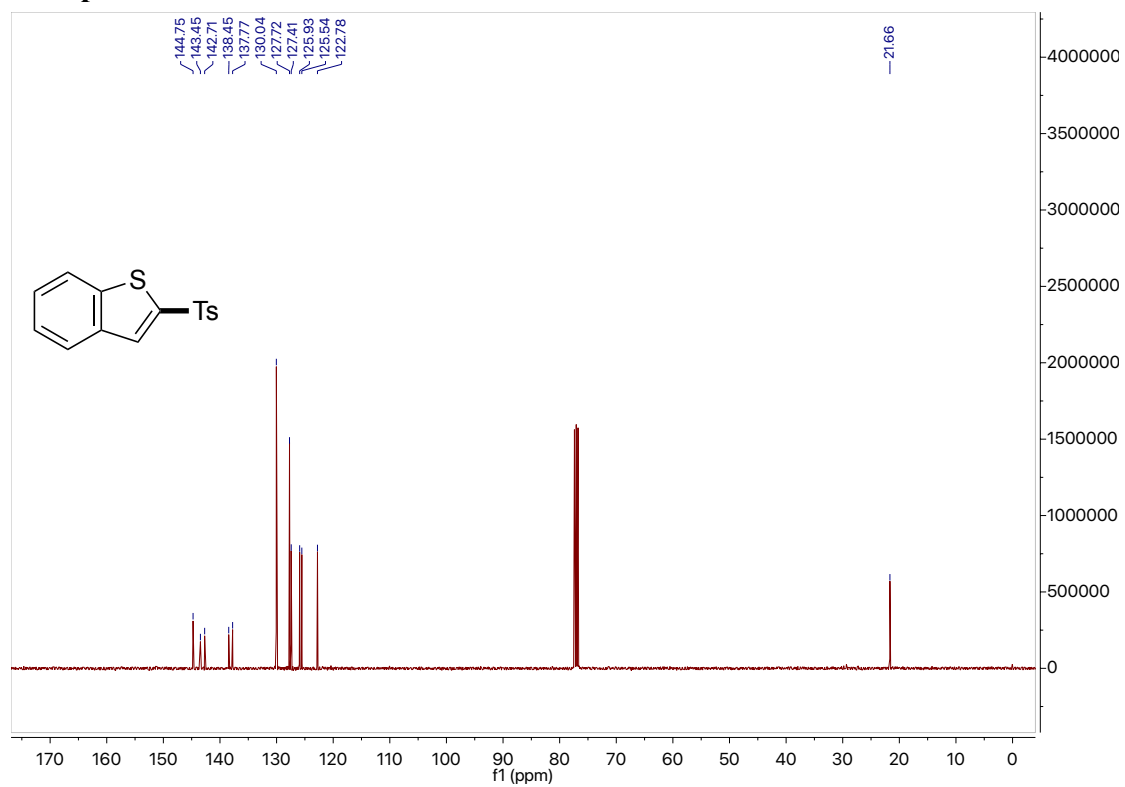



**(3n)**  
**<sup>1</sup>H Spectra**

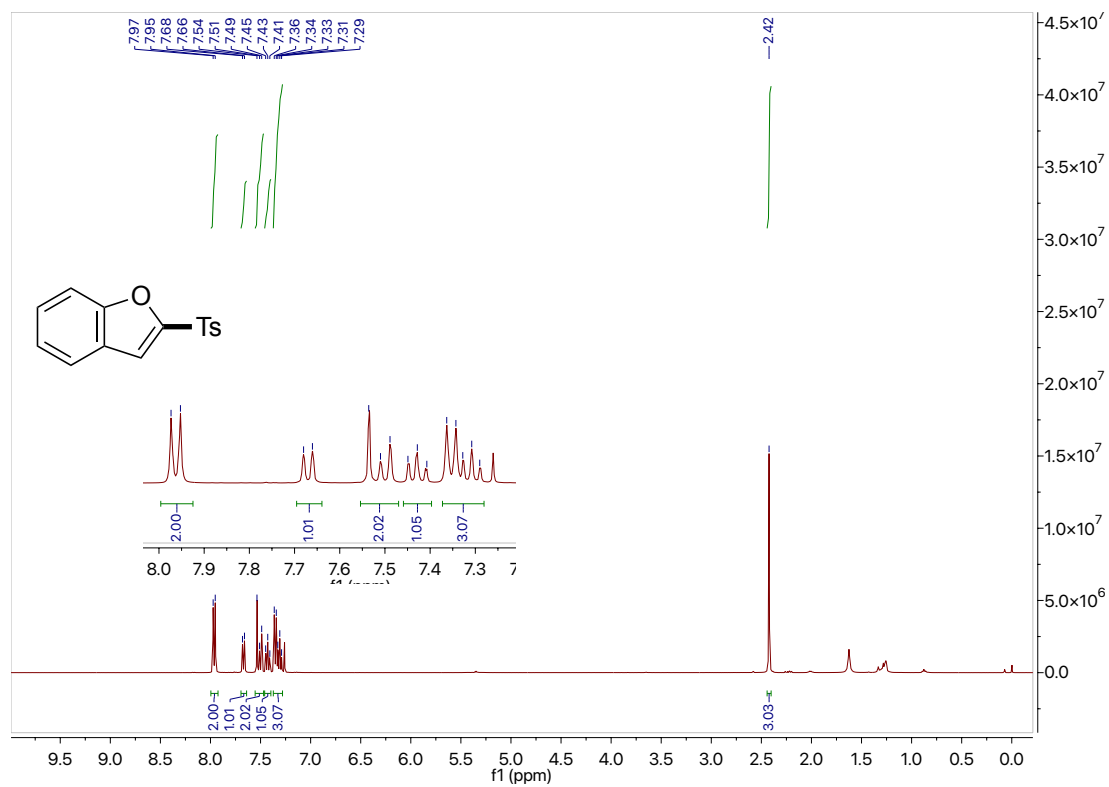

**<sup>13</sup>C Spectra**

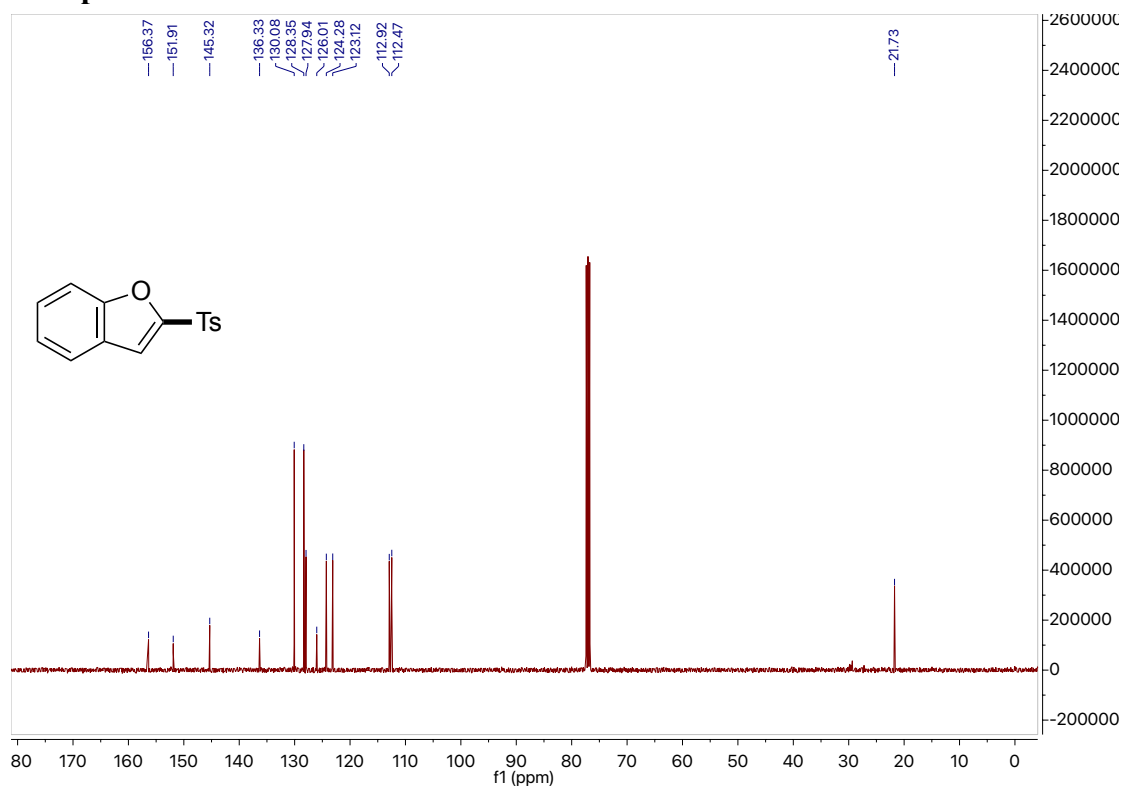

(30)  
<sup>1</sup>H Spectra

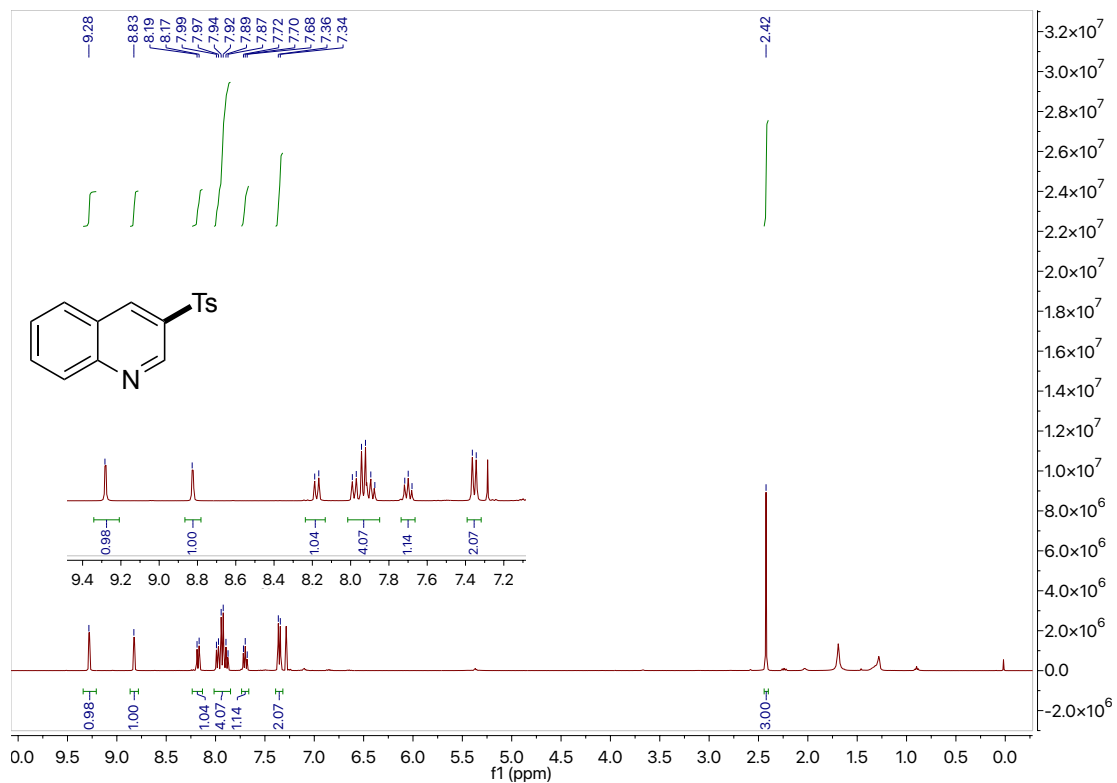

<sup>13</sup>C Spectra

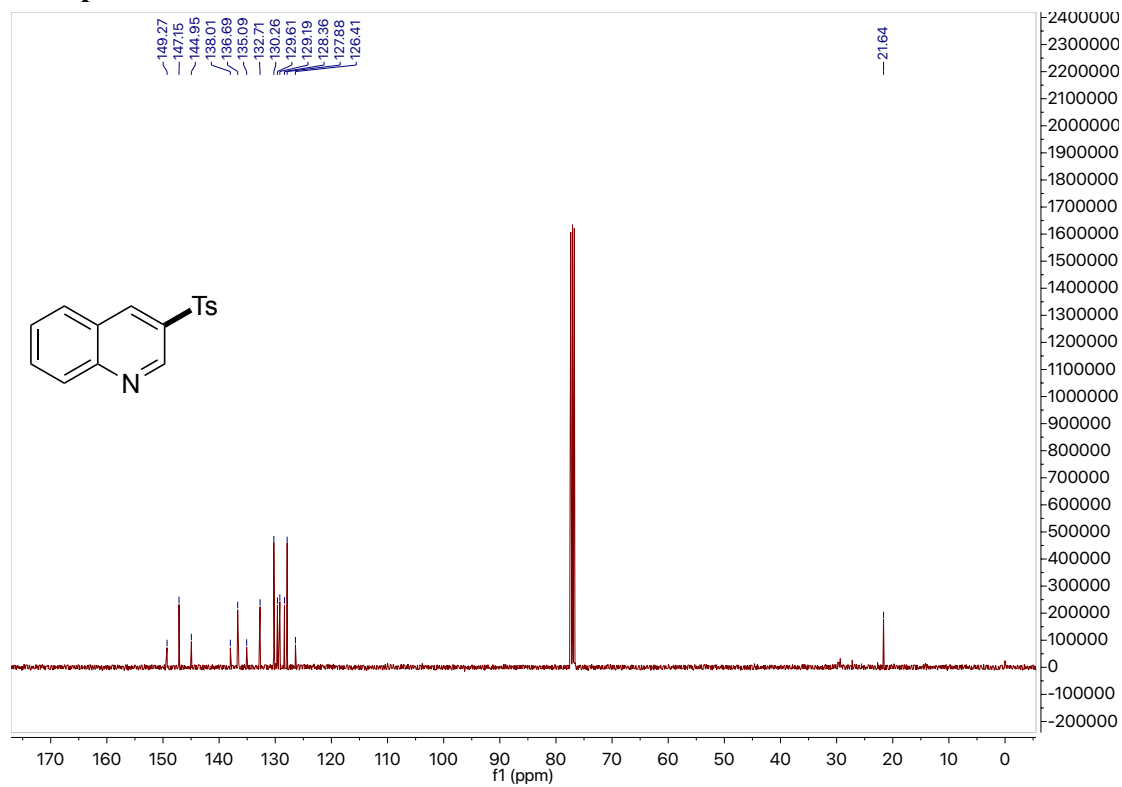

**(3p)**  
**<sup>1</sup>H Spectra**

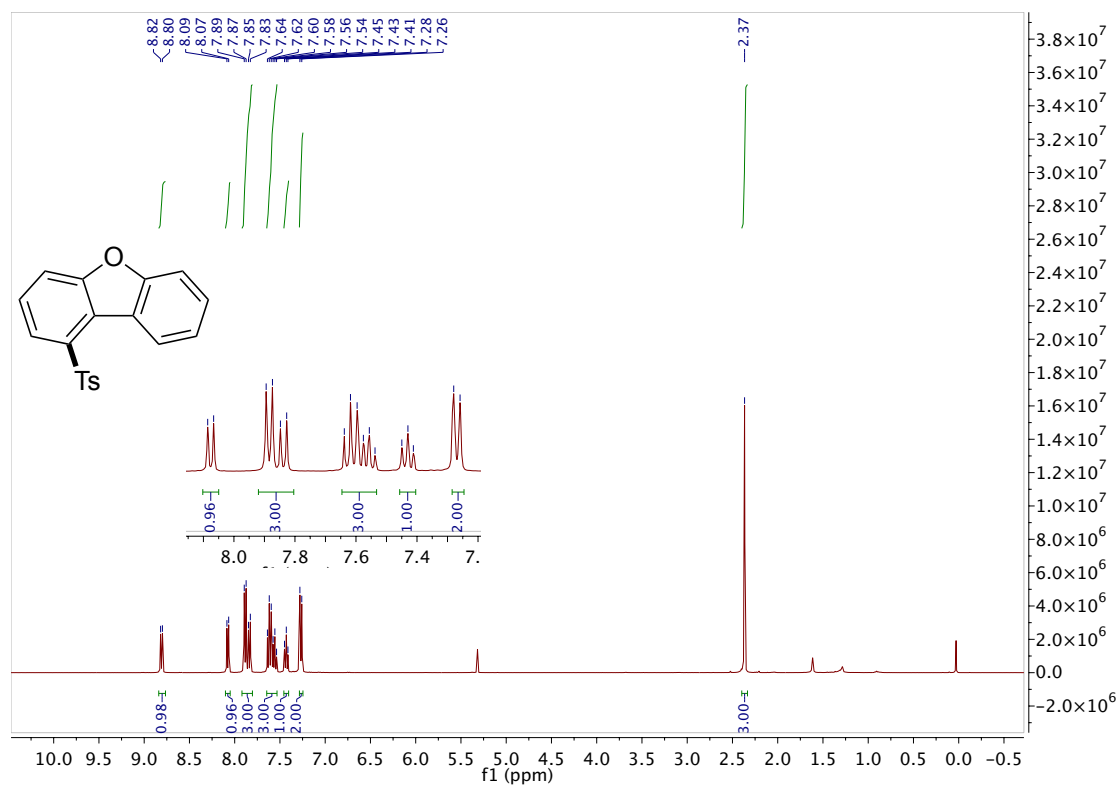

**<sup>13</sup>C Spectra**

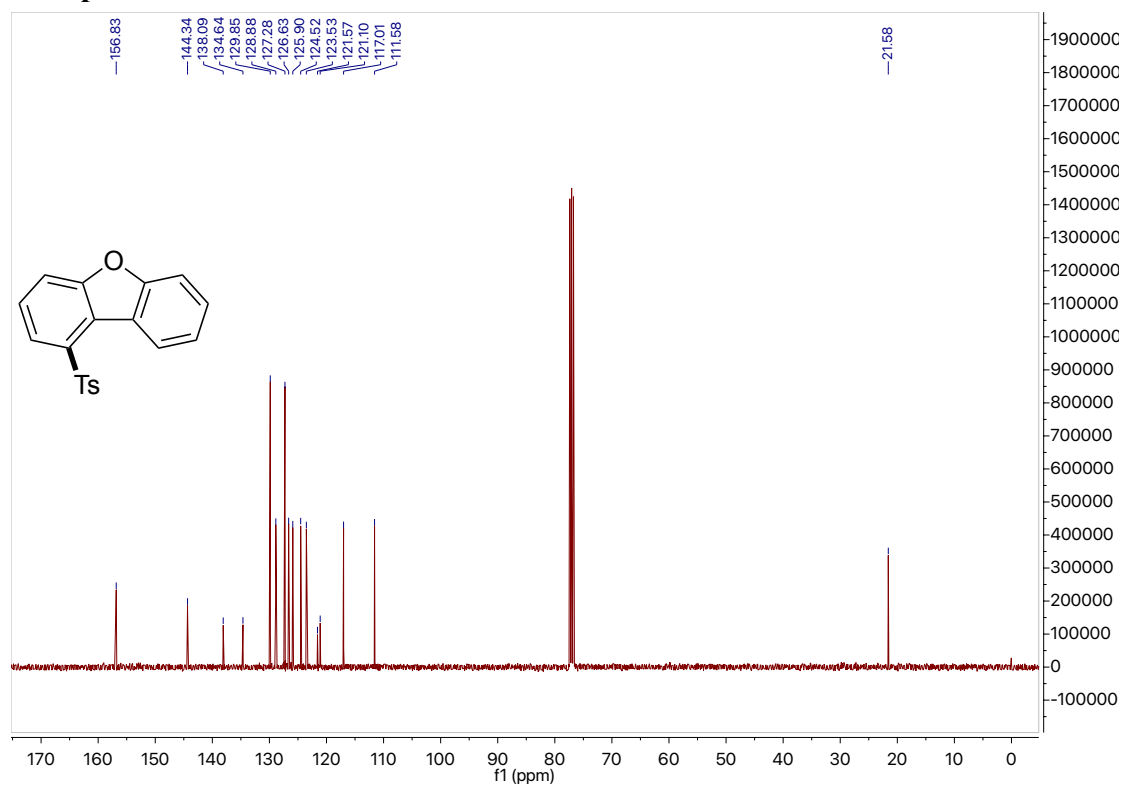

**(3q)**  
**<sup>1</sup>H Spectra**

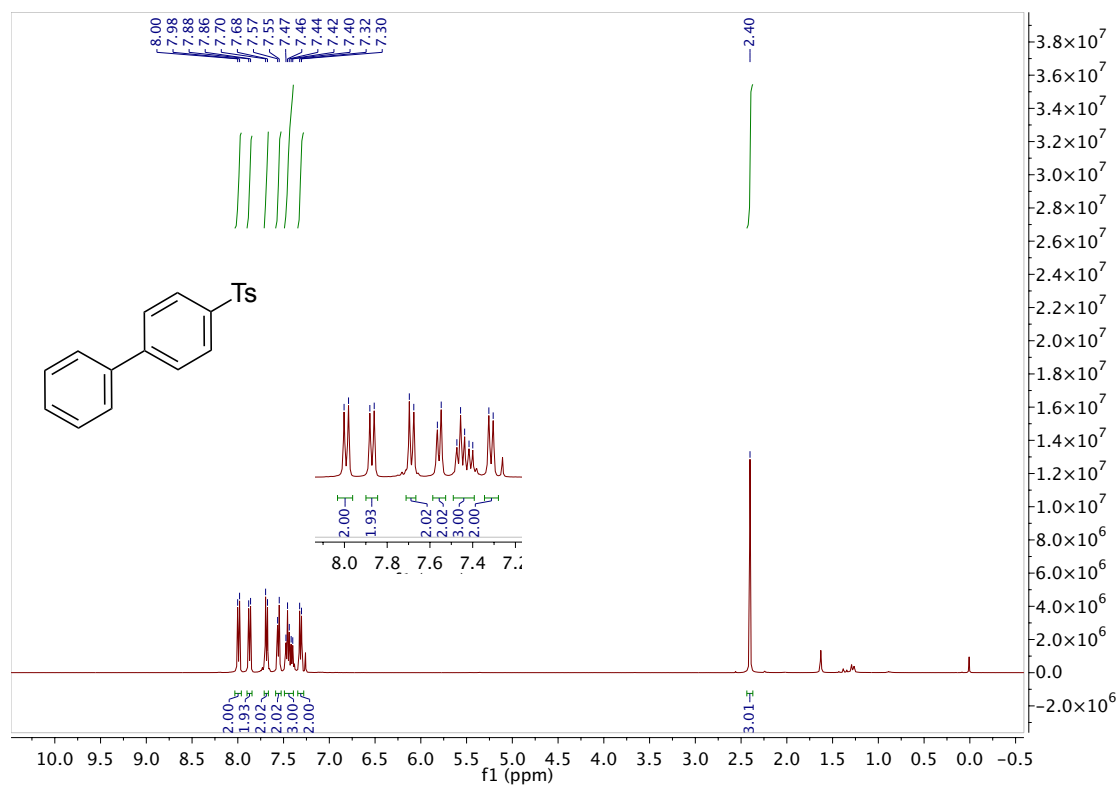

**<sup>13</sup>C Spectra**

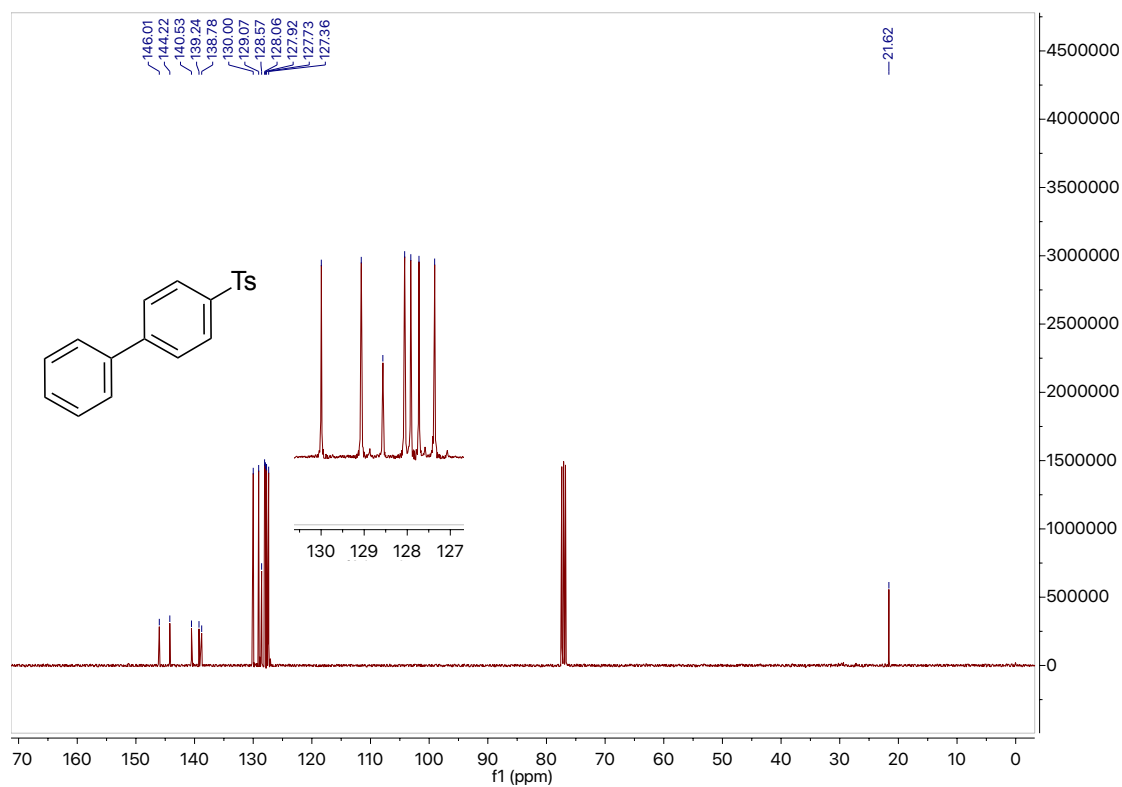

**(3r)**  
**<sup>1</sup>H Spectra**

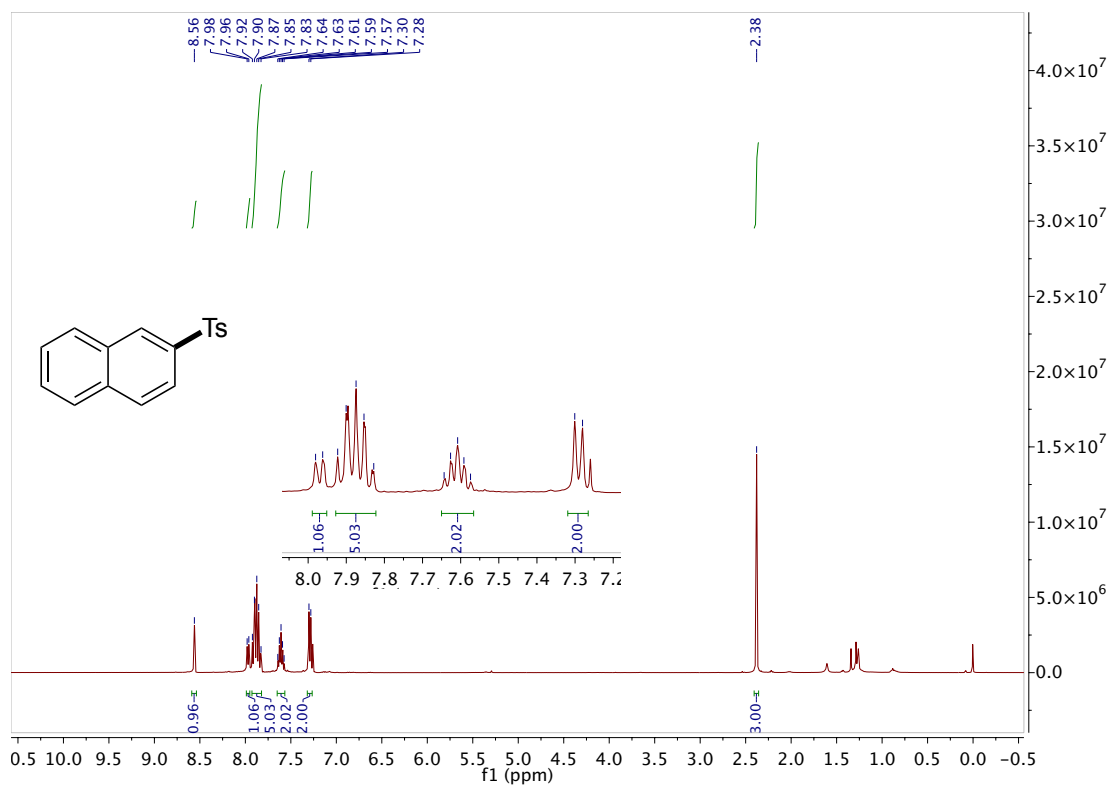

**<sup>13</sup>C Spectra**

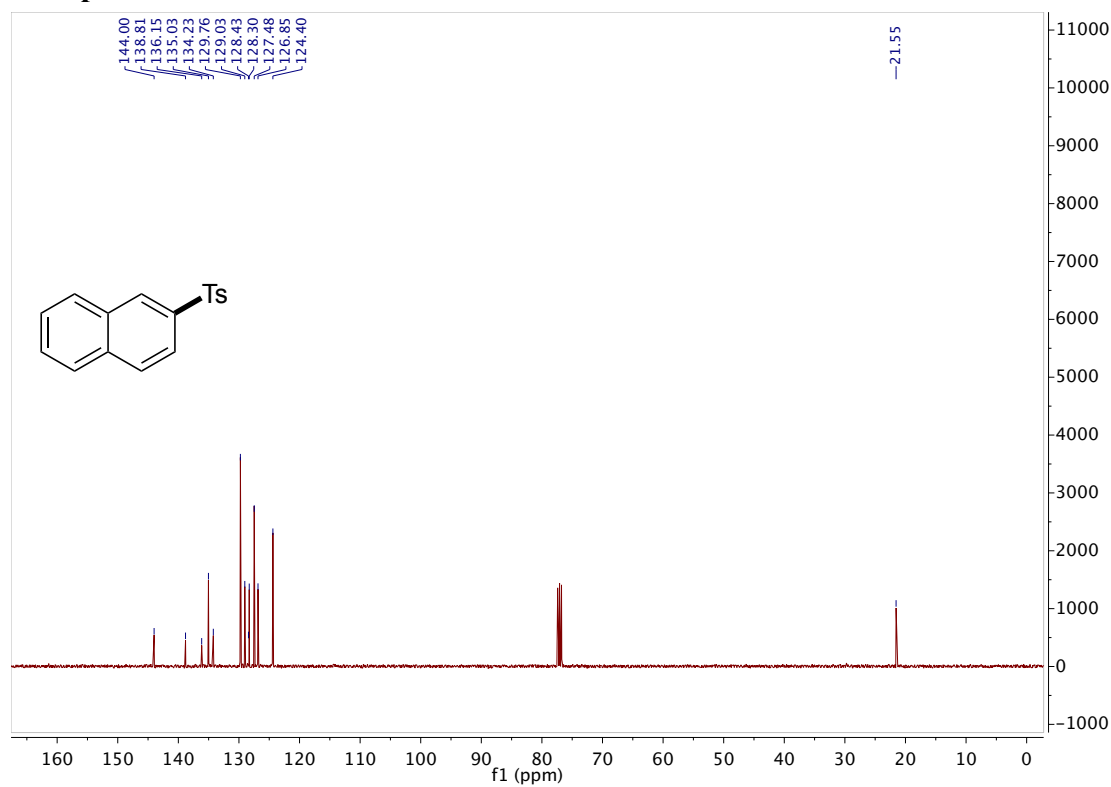

(3s)  
<sup>1</sup>H Spectra

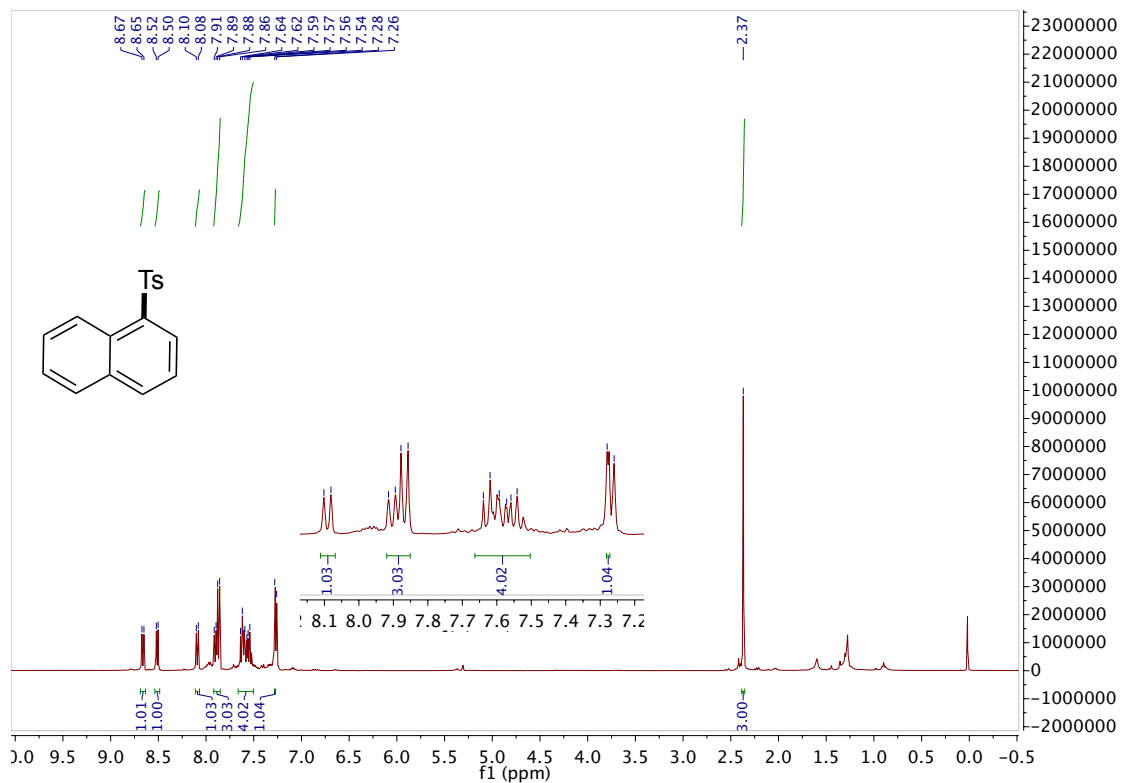

<sup>13</sup>C Spectra

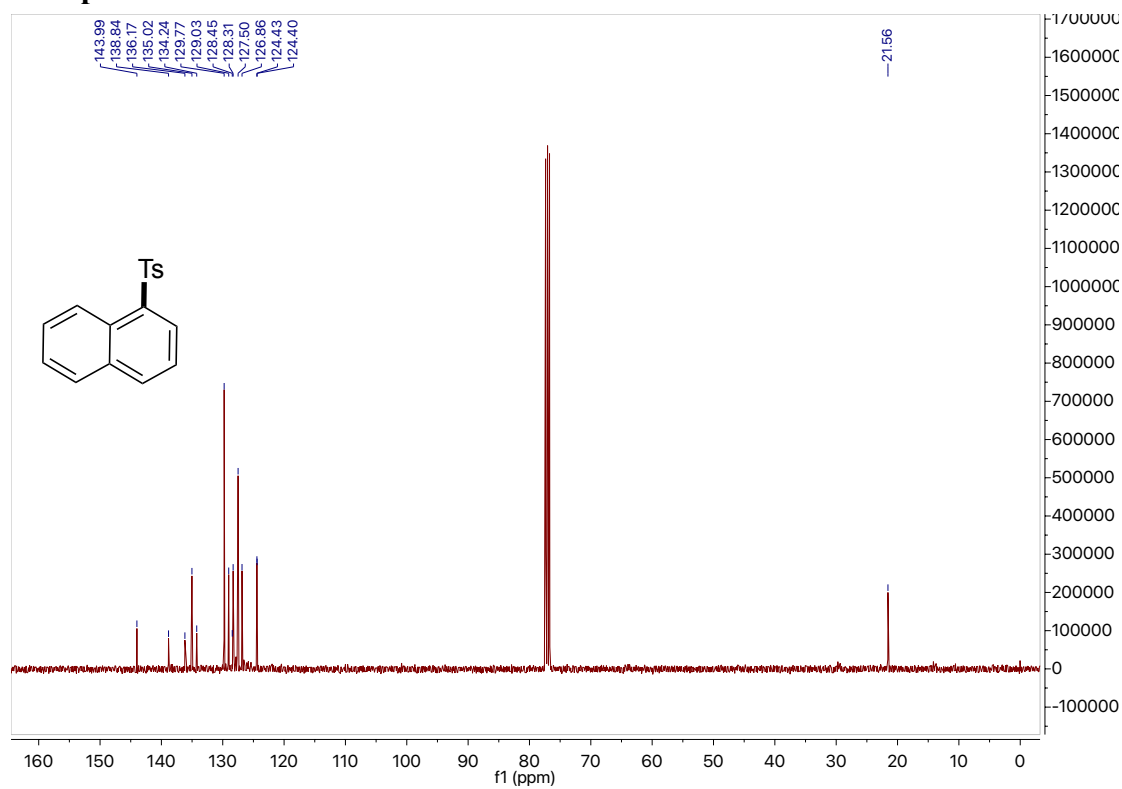

**(3t)**  
**<sup>1</sup>H Spectra**

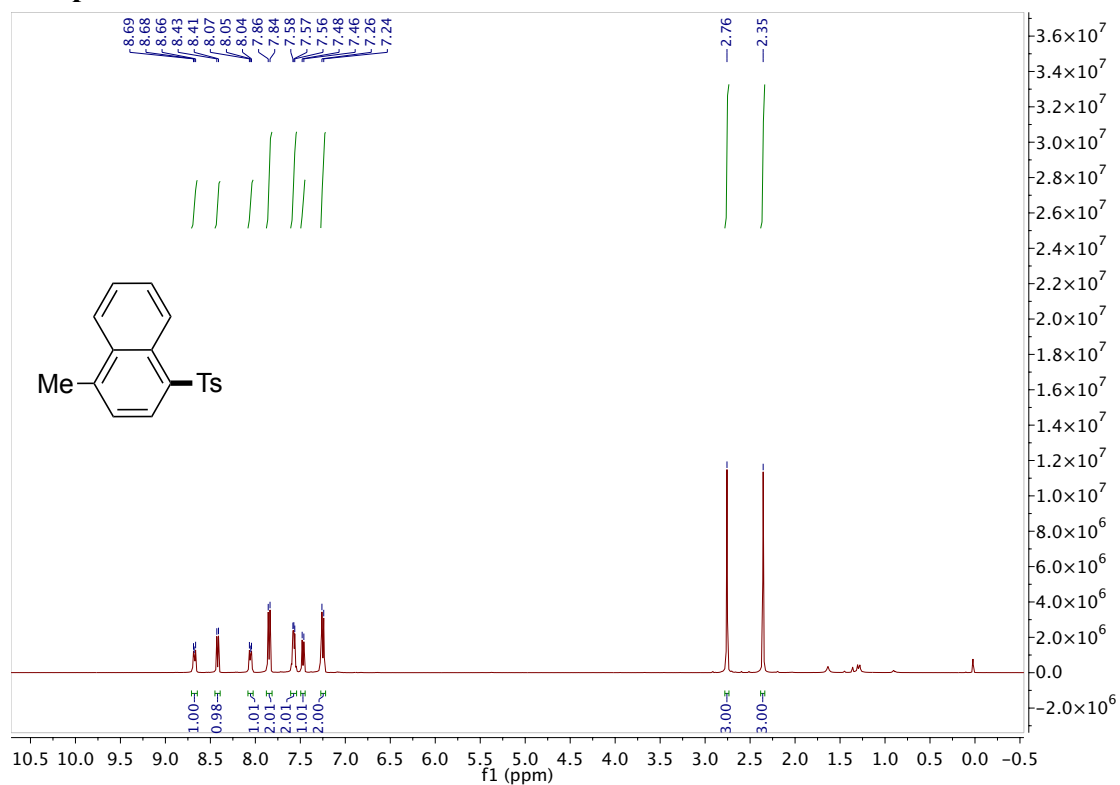

**<sup>13</sup>C Spectra**

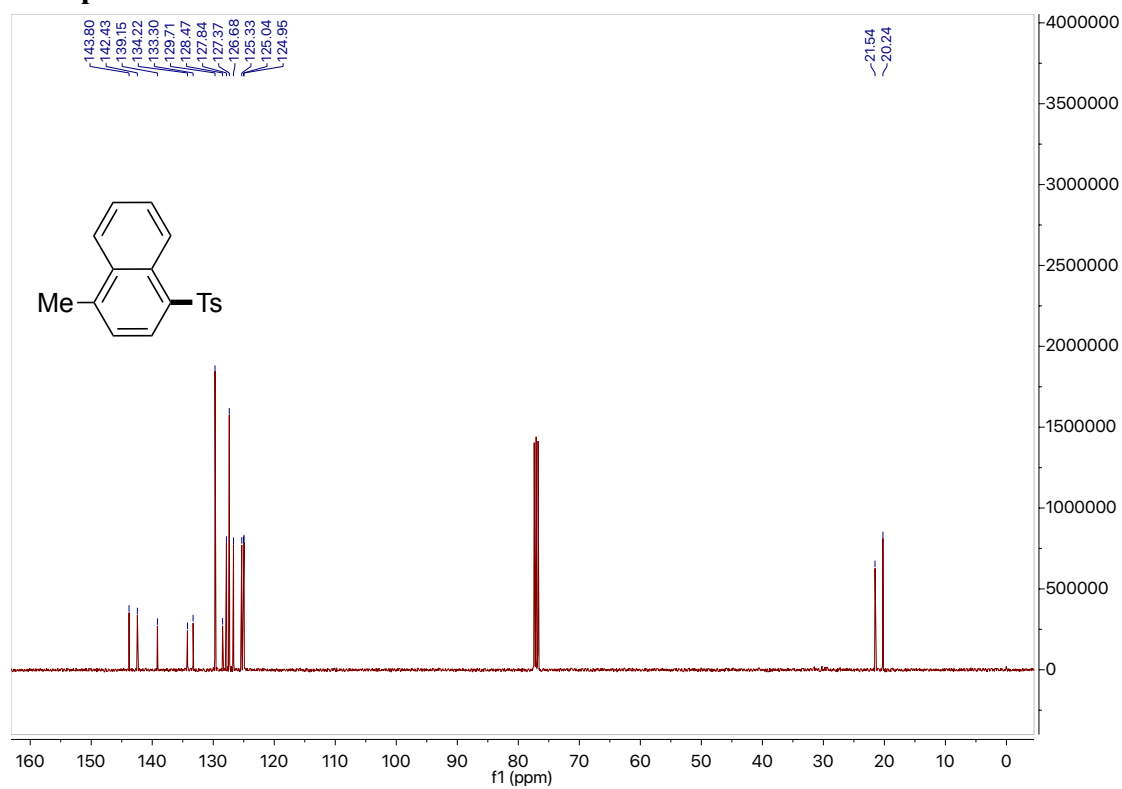

**(3u)**  
**<sup>1</sup>H Spectra**

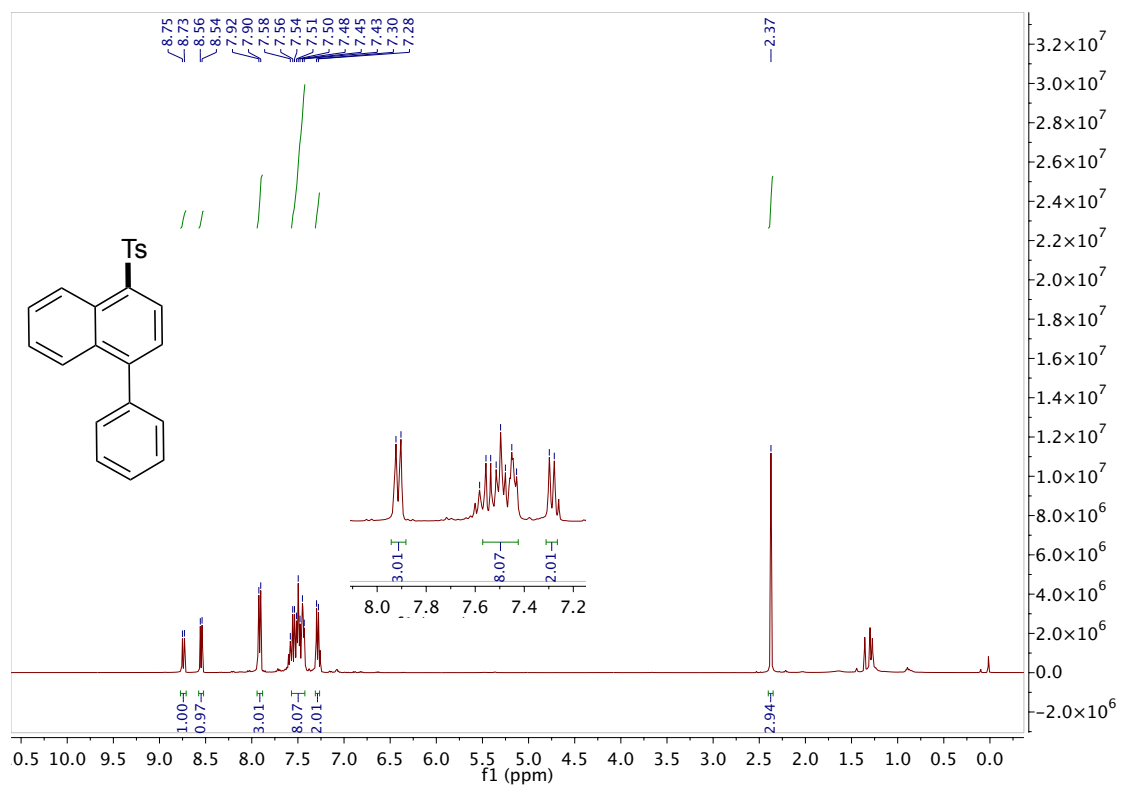

**<sup>13</sup>C Spectra**

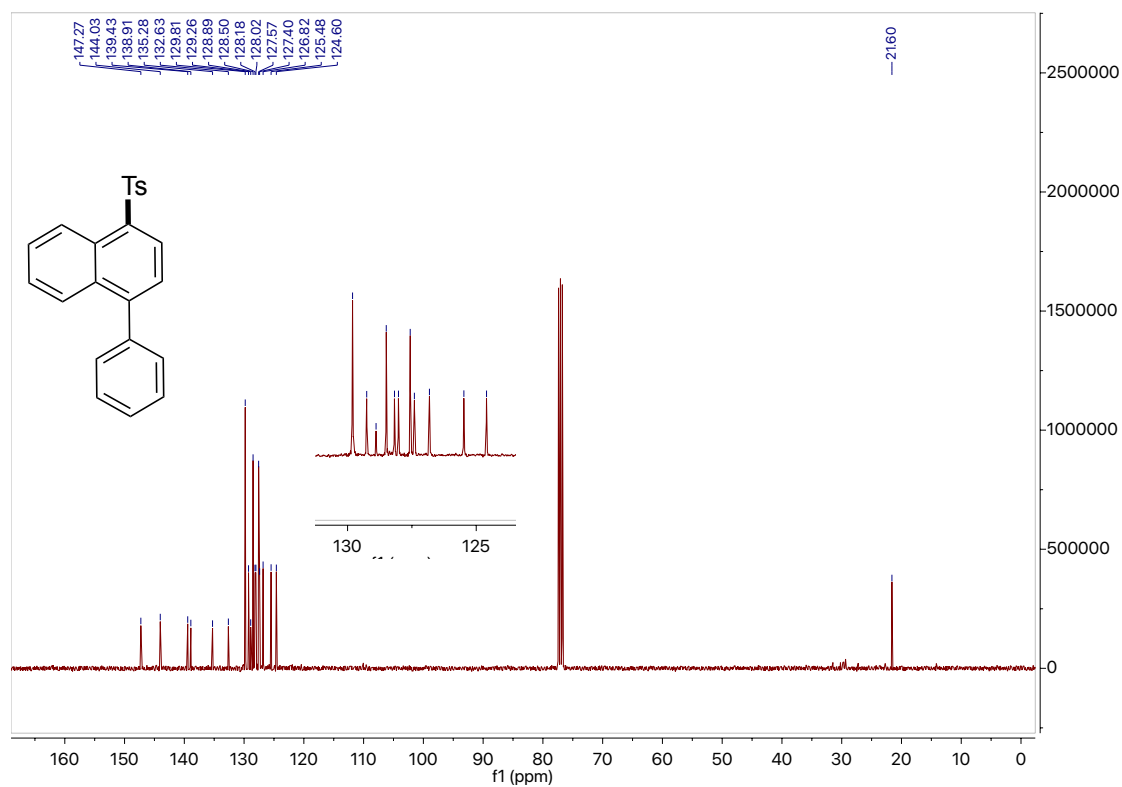



(3v)  
<sup>1</sup>H Spectra

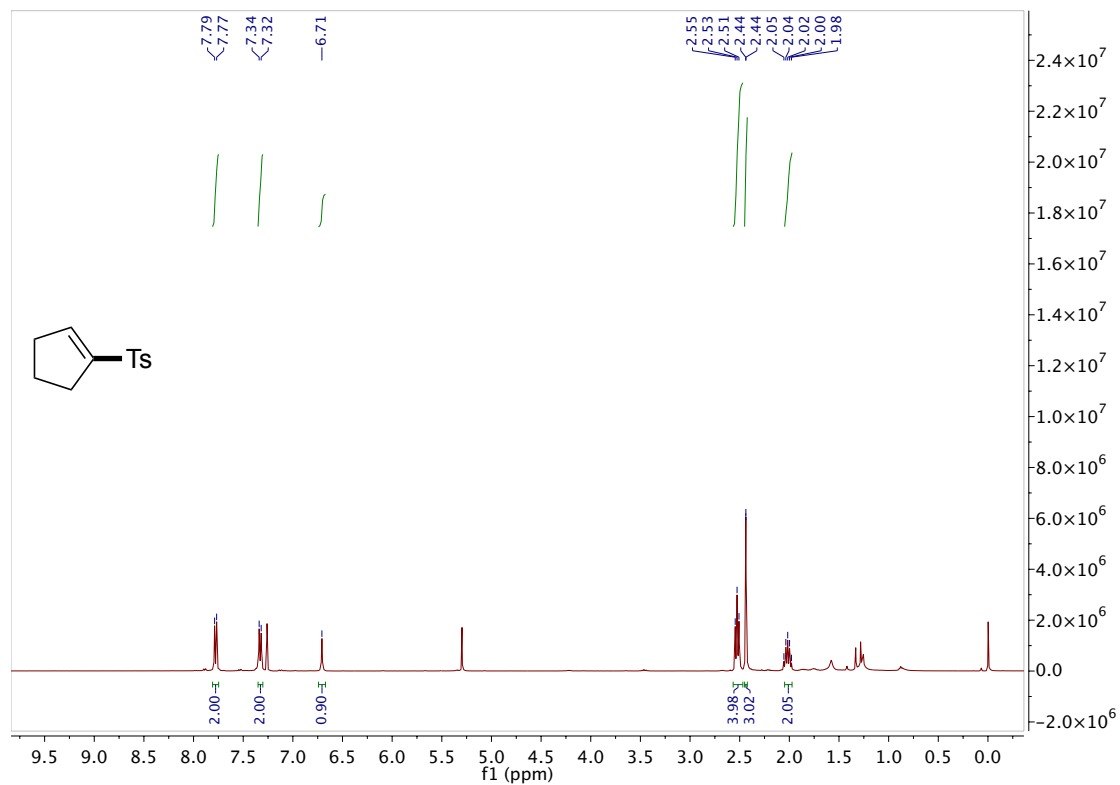

<sup>13</sup>C Spectra

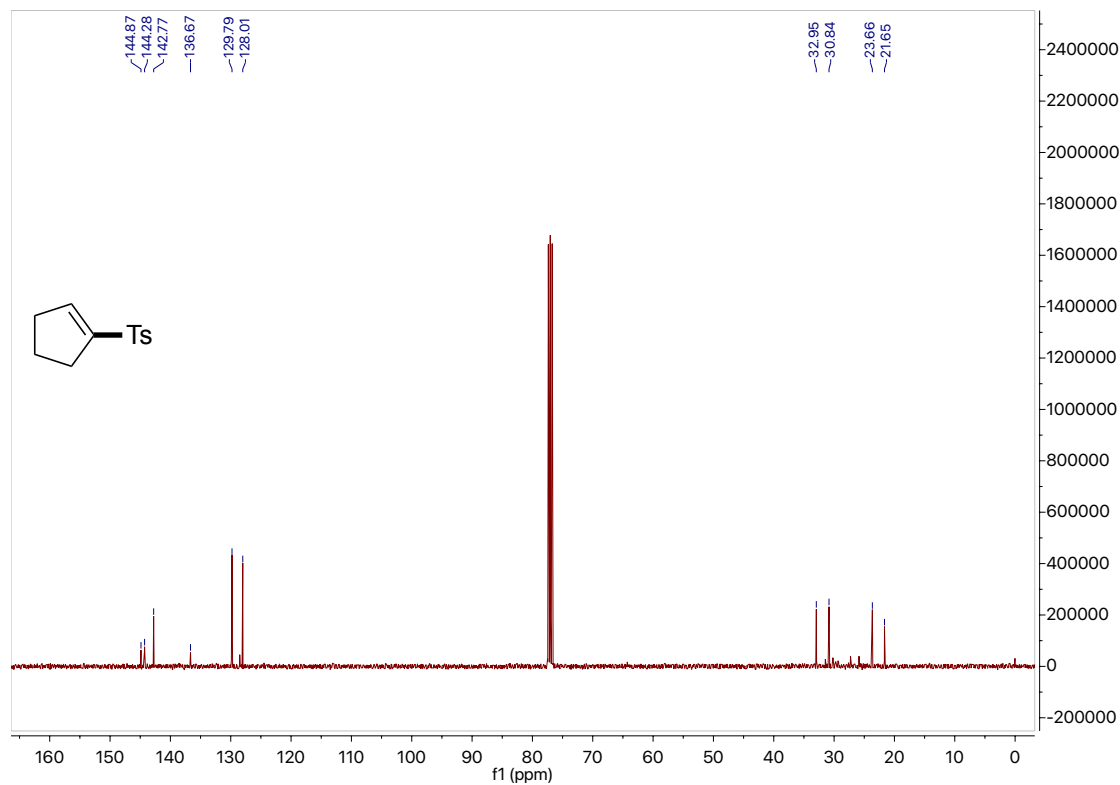

(3w)  
<sup>1</sup>H Spectra

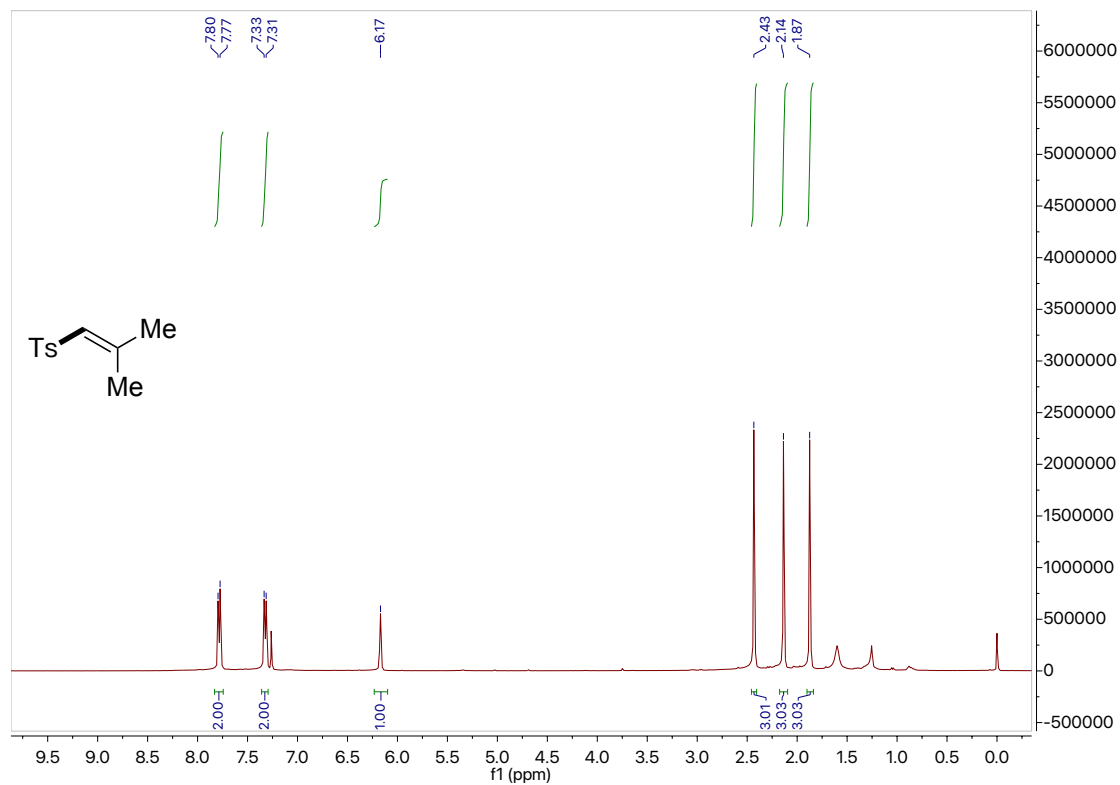

<sup>13</sup>C Spectra

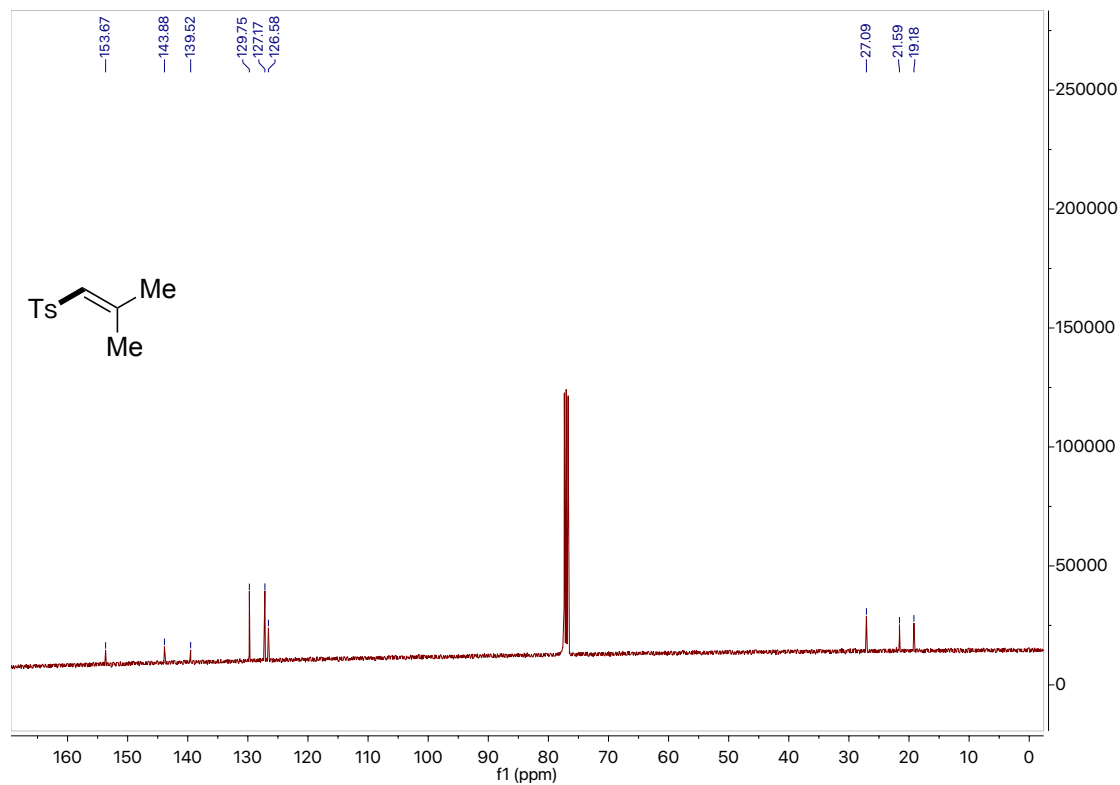

**(3x)**  
**<sup>1</sup>H Spectra**

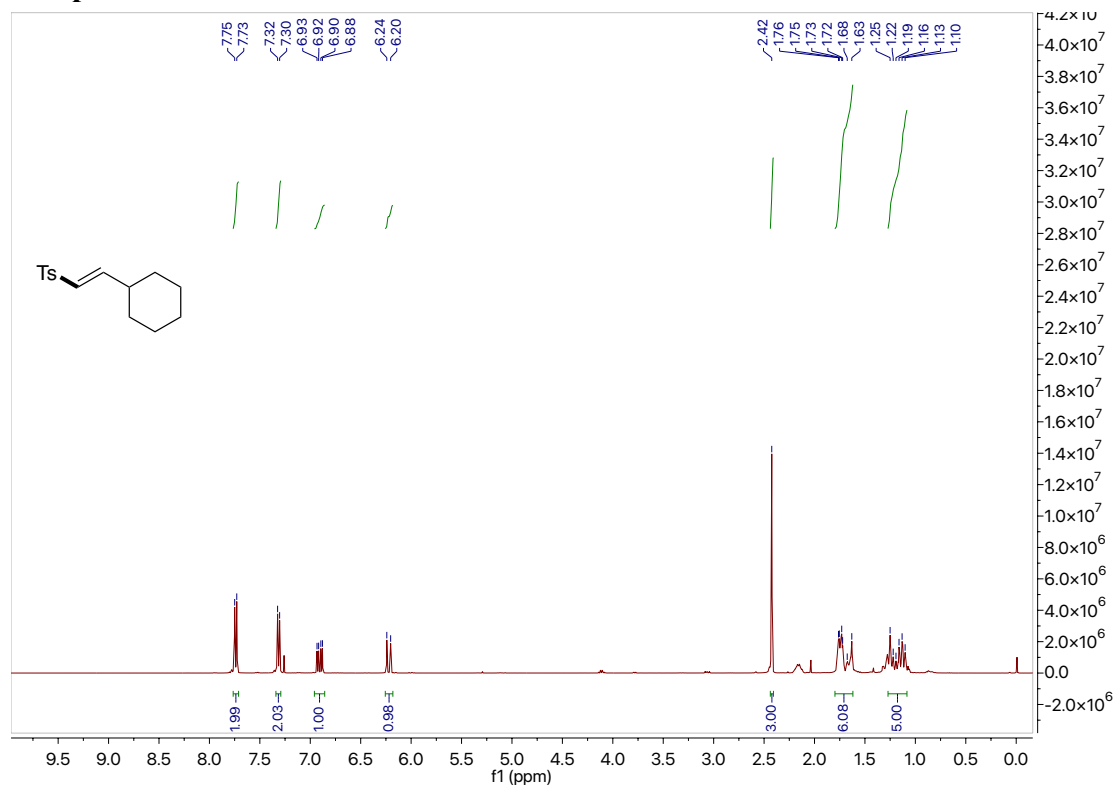

**<sup>13</sup>C Spectra**

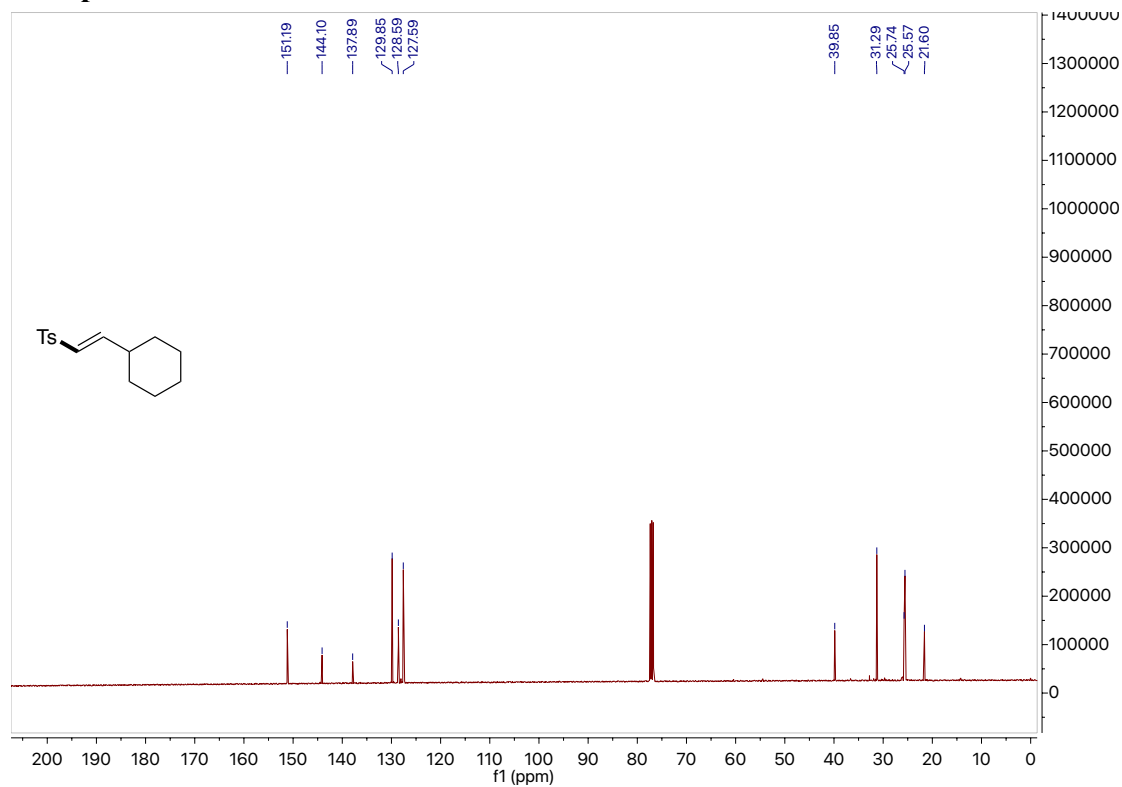

(4a)  
<sup>1</sup>H Spectra

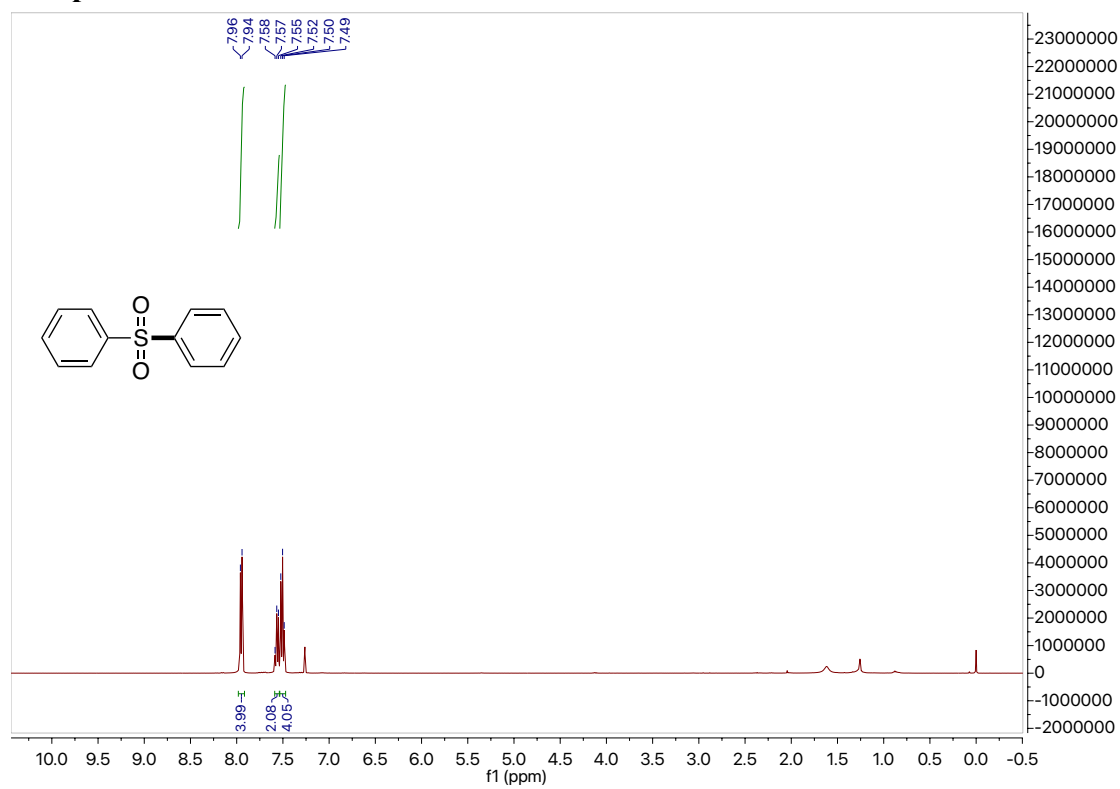

<sup>13</sup>C Spectra

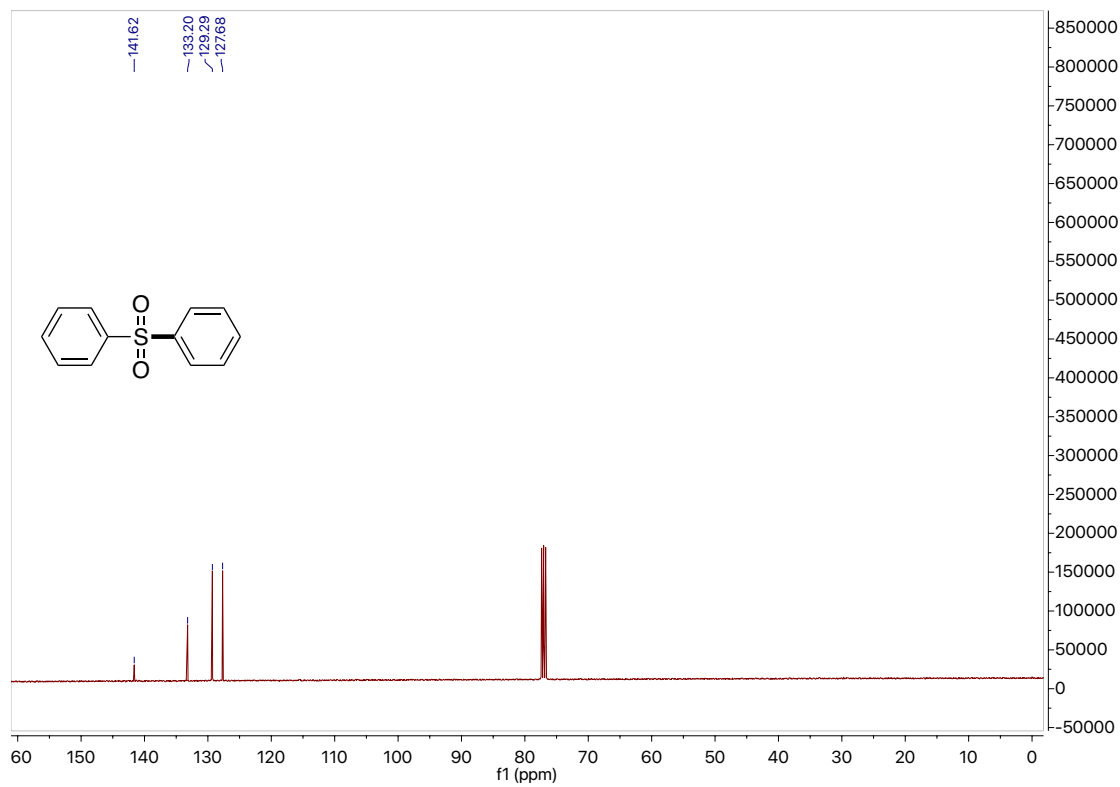

(4b)  
**<sup>1</sup>H Spectra**

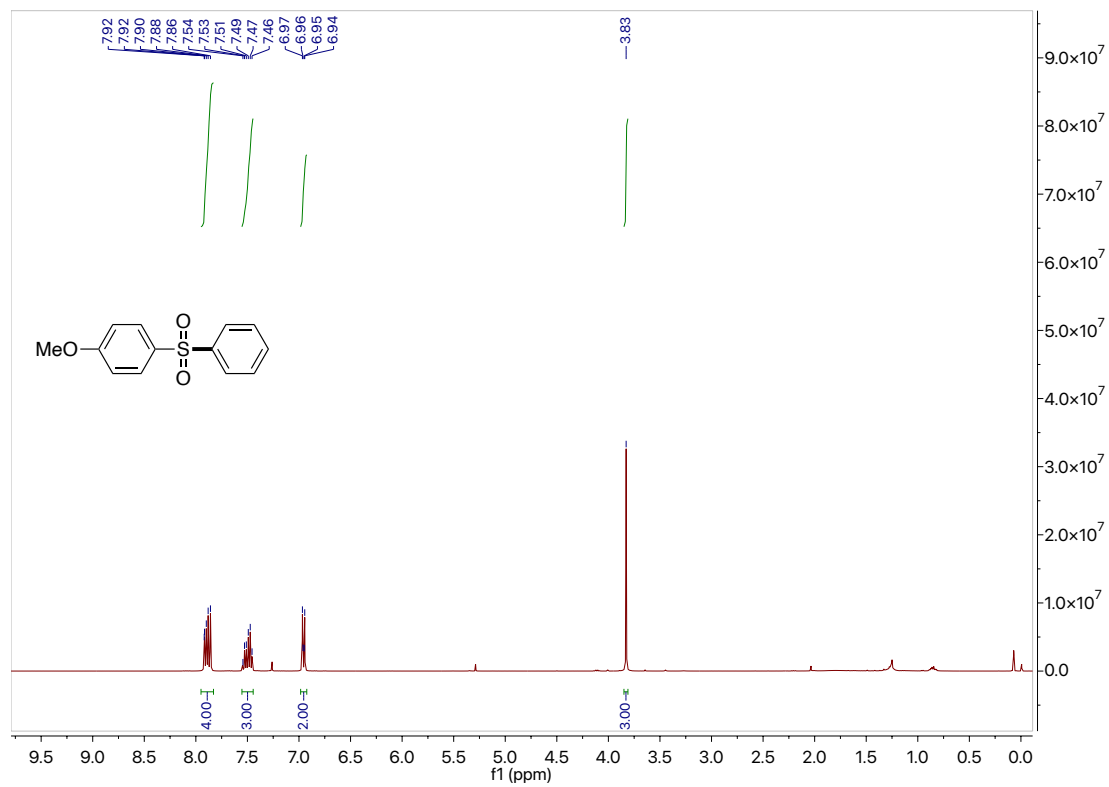

**<sup>13</sup>C Spectra**

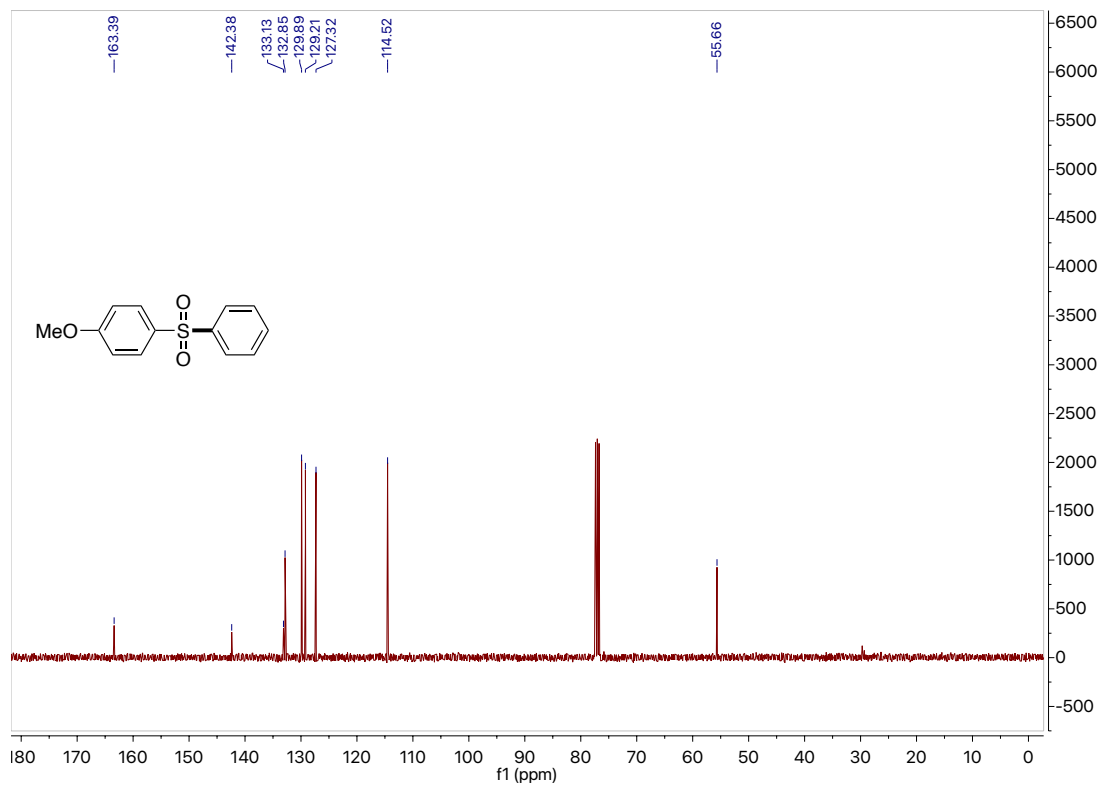

(4c)  
**<sup>1</sup>H Spectra**

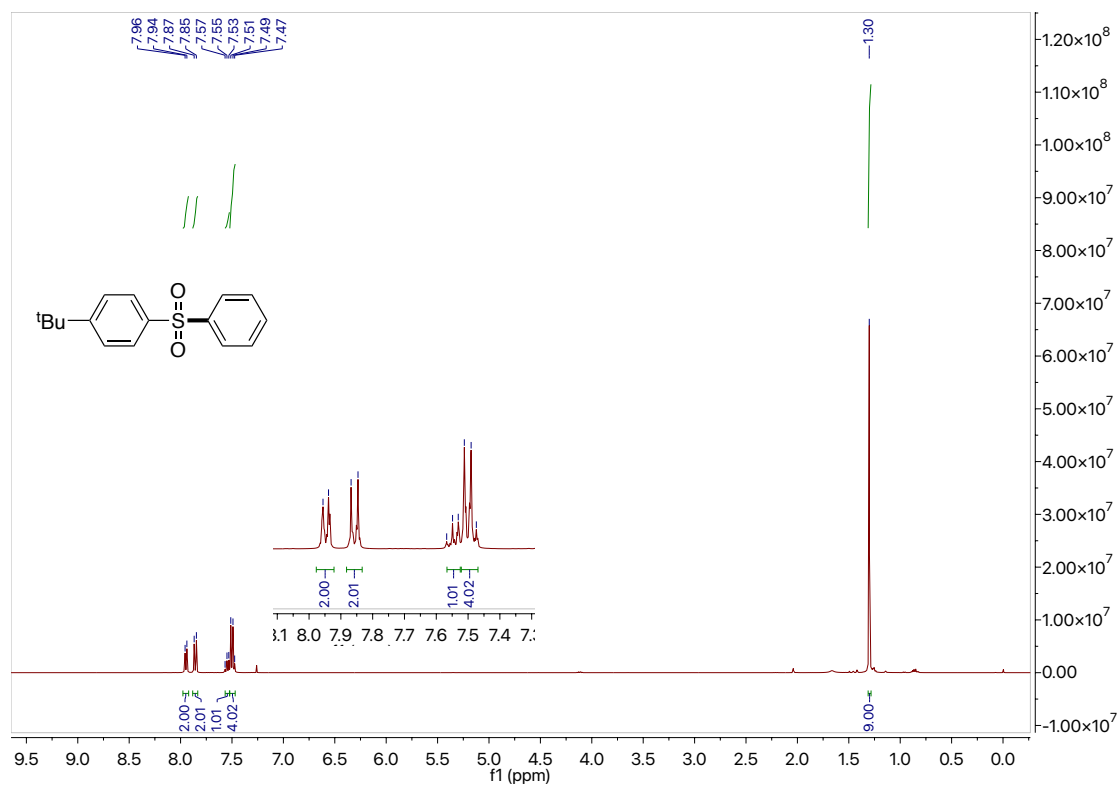

**<sup>13</sup>C Spectra**

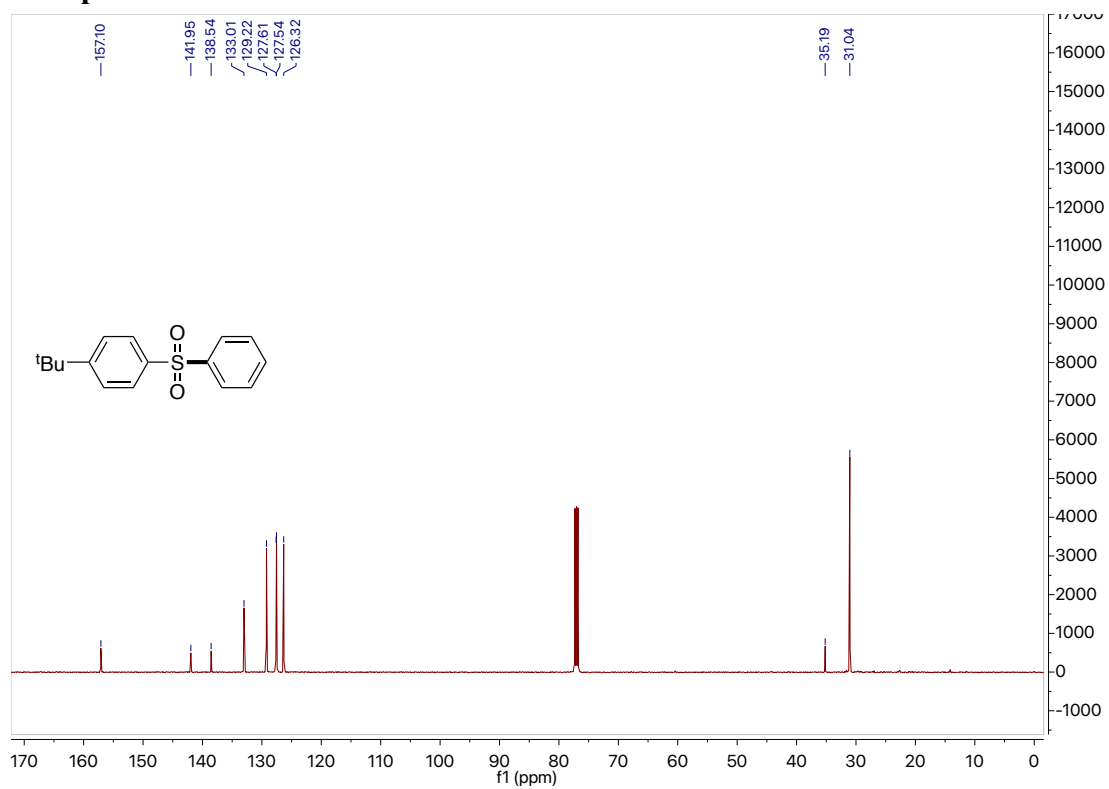

(4d)  
<sup>1</sup>H Spectra

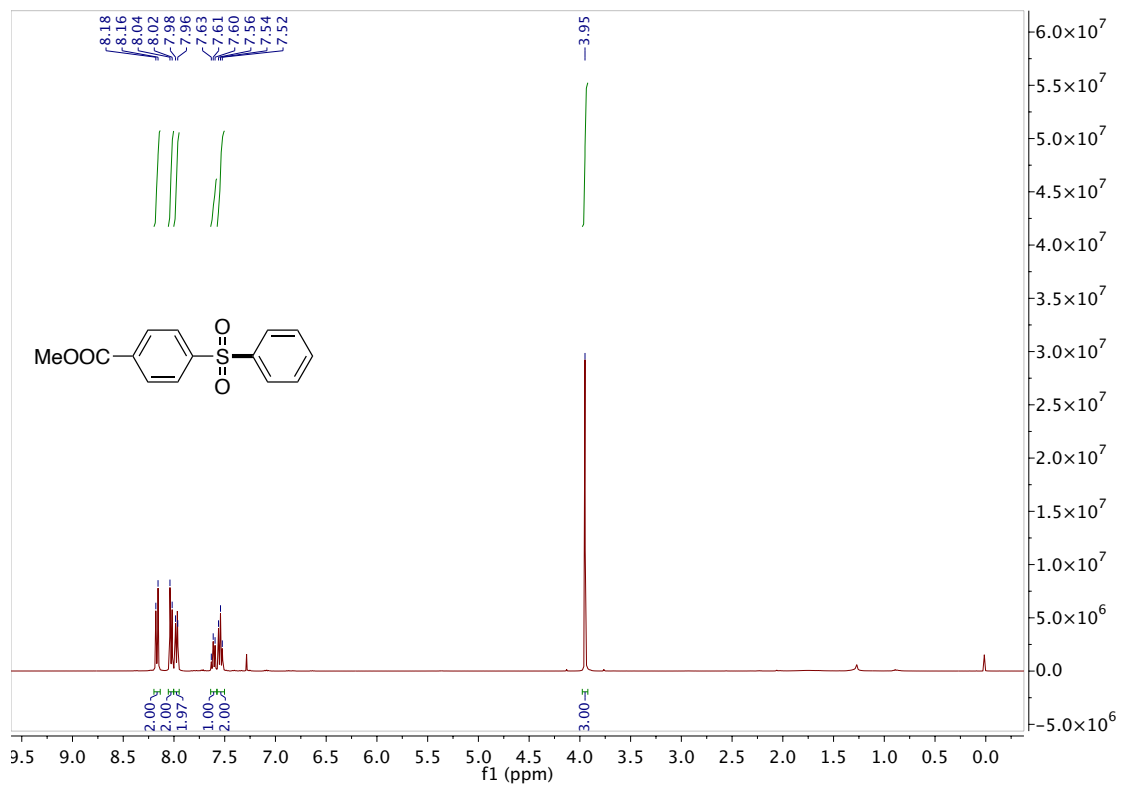

<sup>13</sup>C Spectra

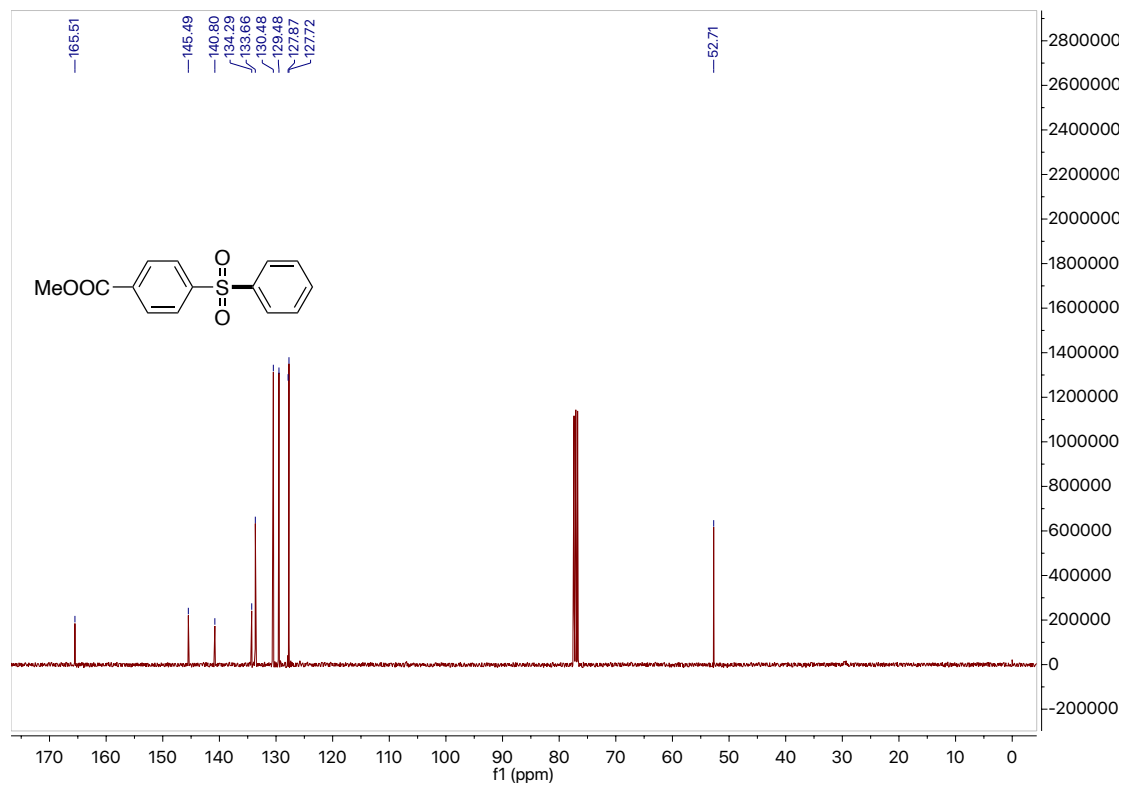

(4e)  
<sup>1</sup>H Spectra

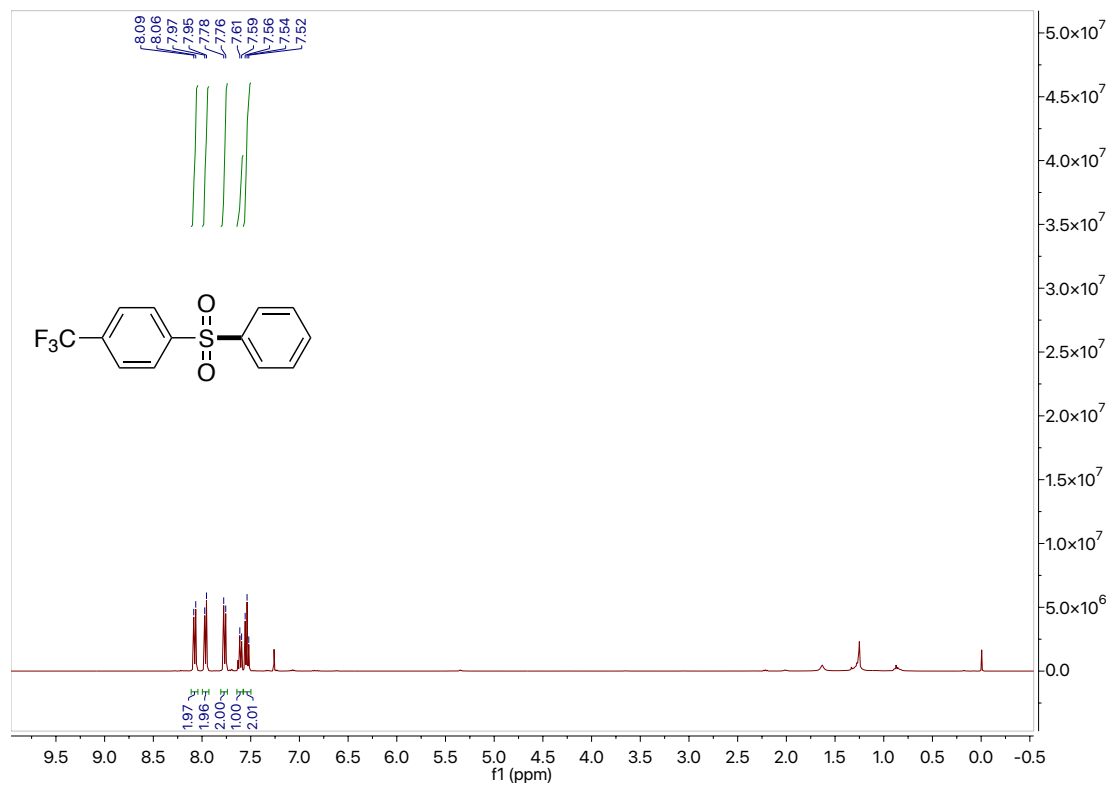

<sup>13</sup>C Spectra

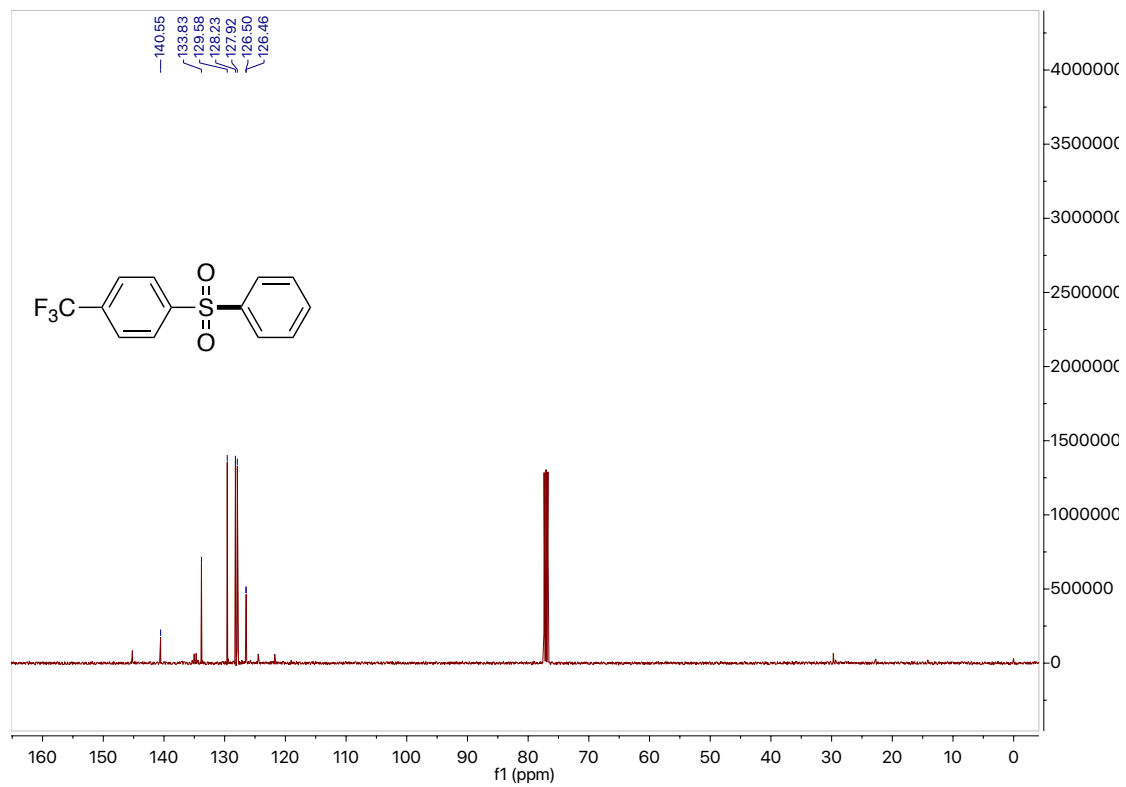



# <sup>19</sup>F Spectra

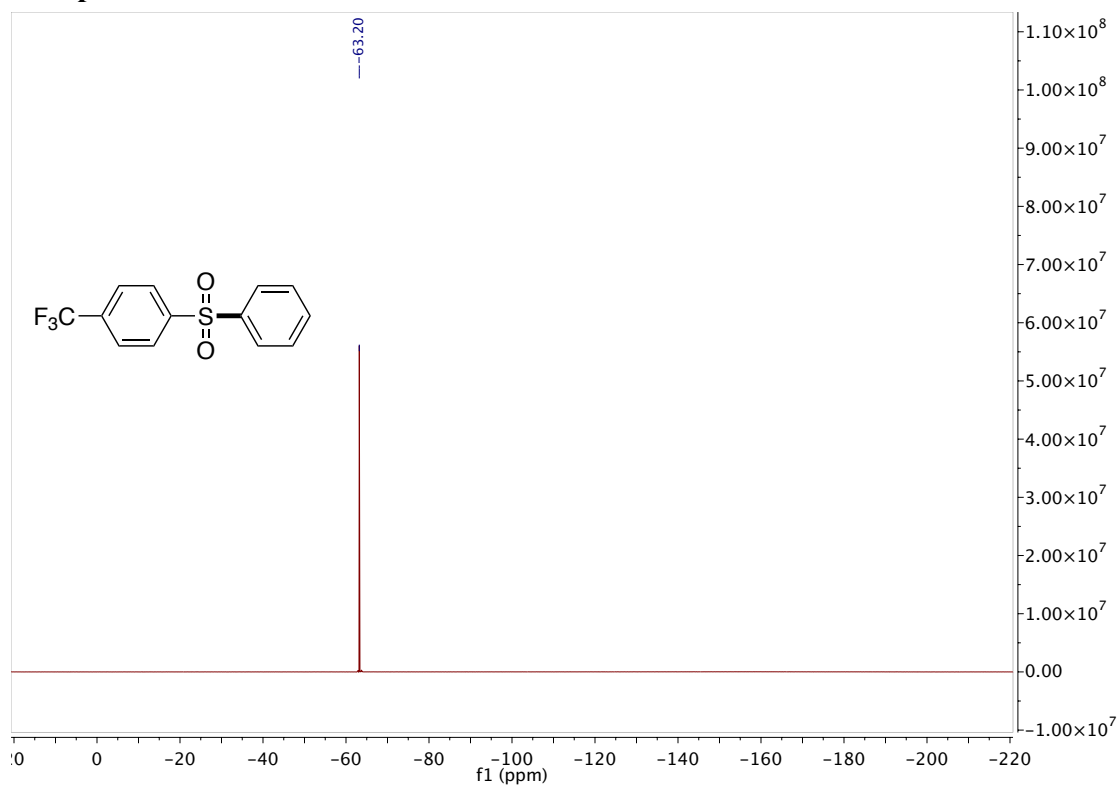

(4f)  
<sup>1</sup>H Spectra

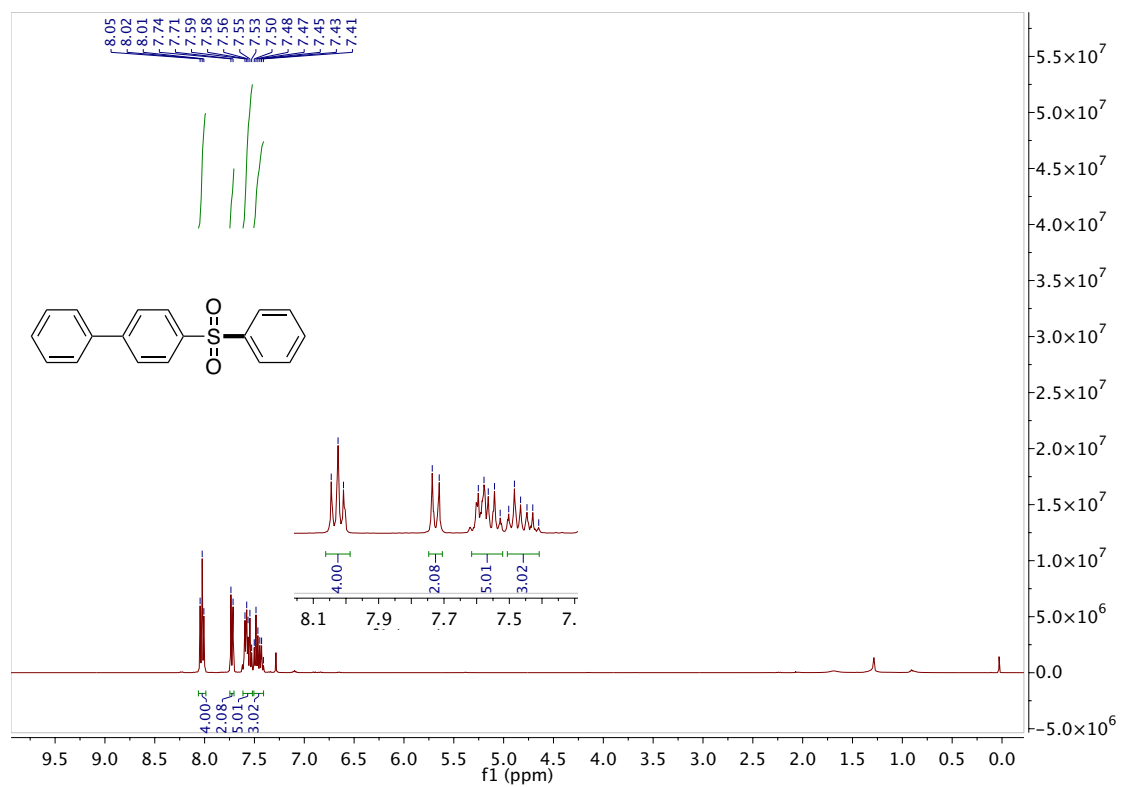

<sup>13</sup>C Spectra

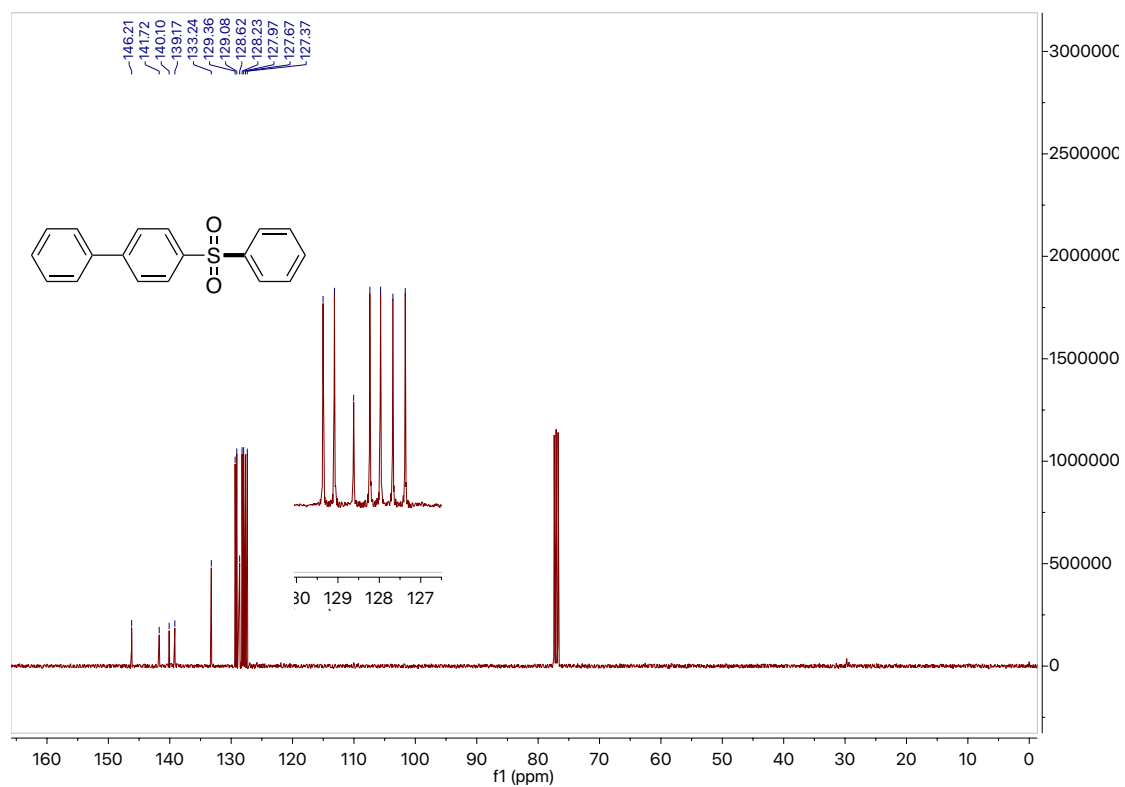

(4g)  
<sup>1</sup>H Spectra

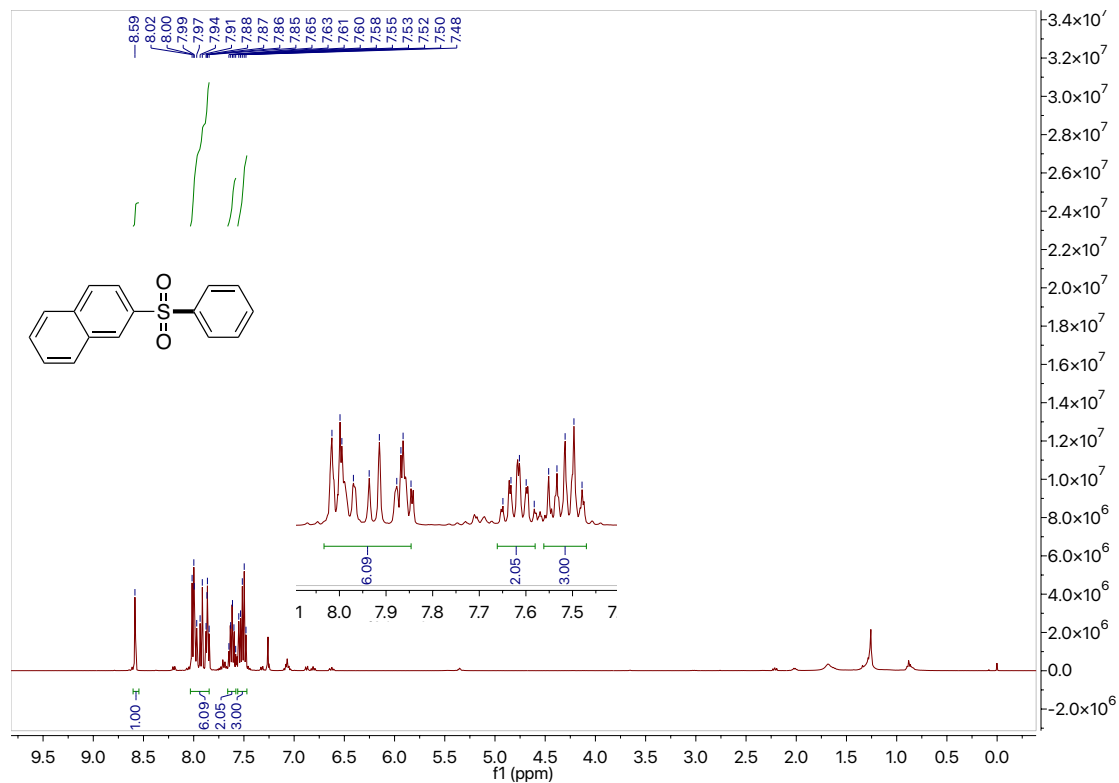

<sup>13</sup>C Spectra

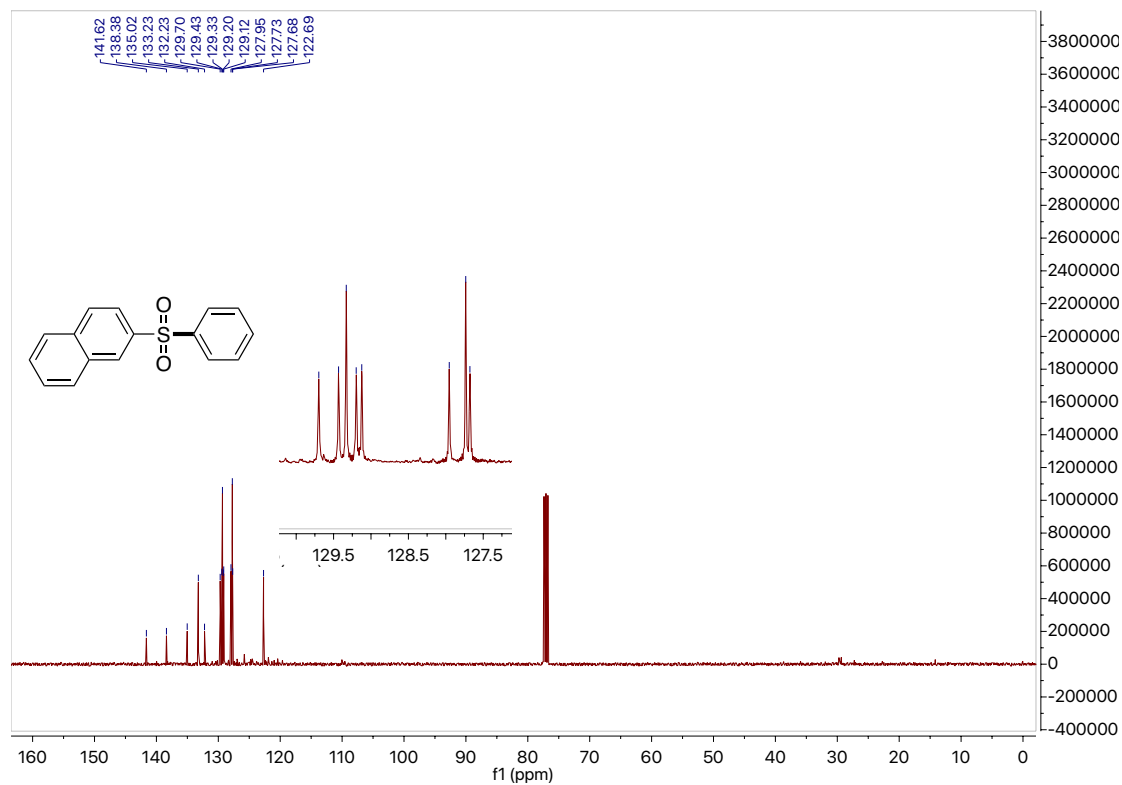

(4h)  
<sup>1</sup>H Spectra

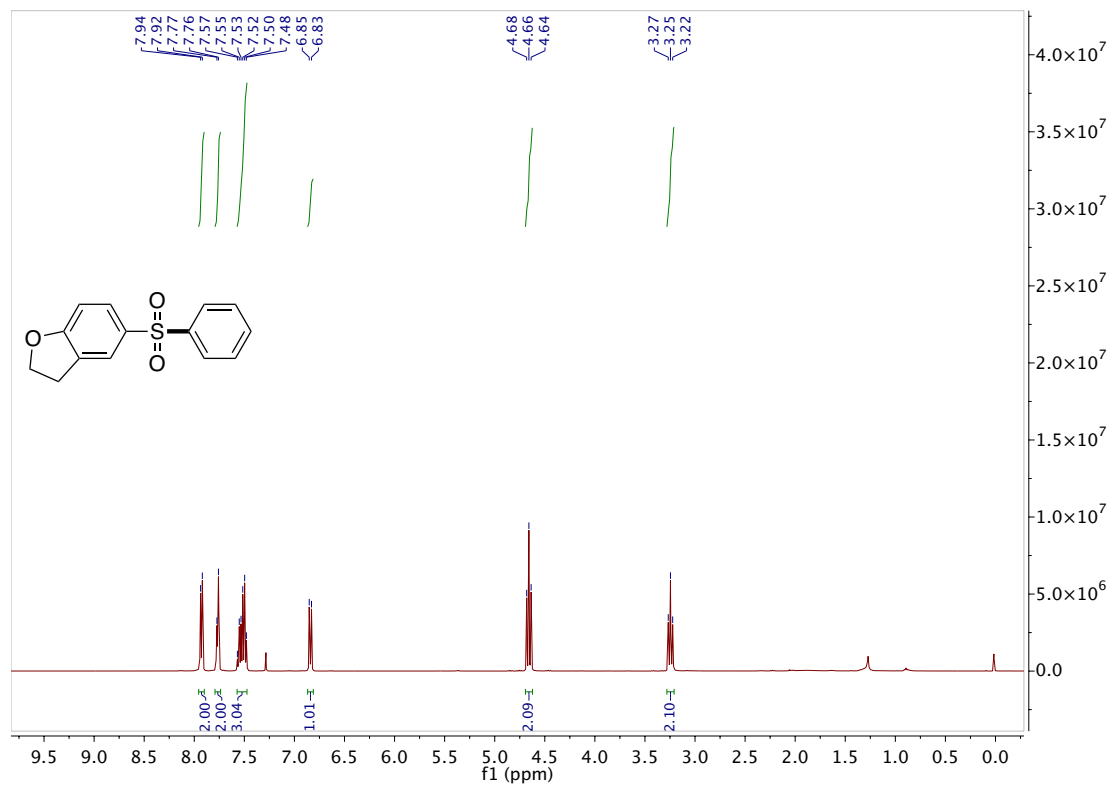

<sup>13</sup>C Spectra

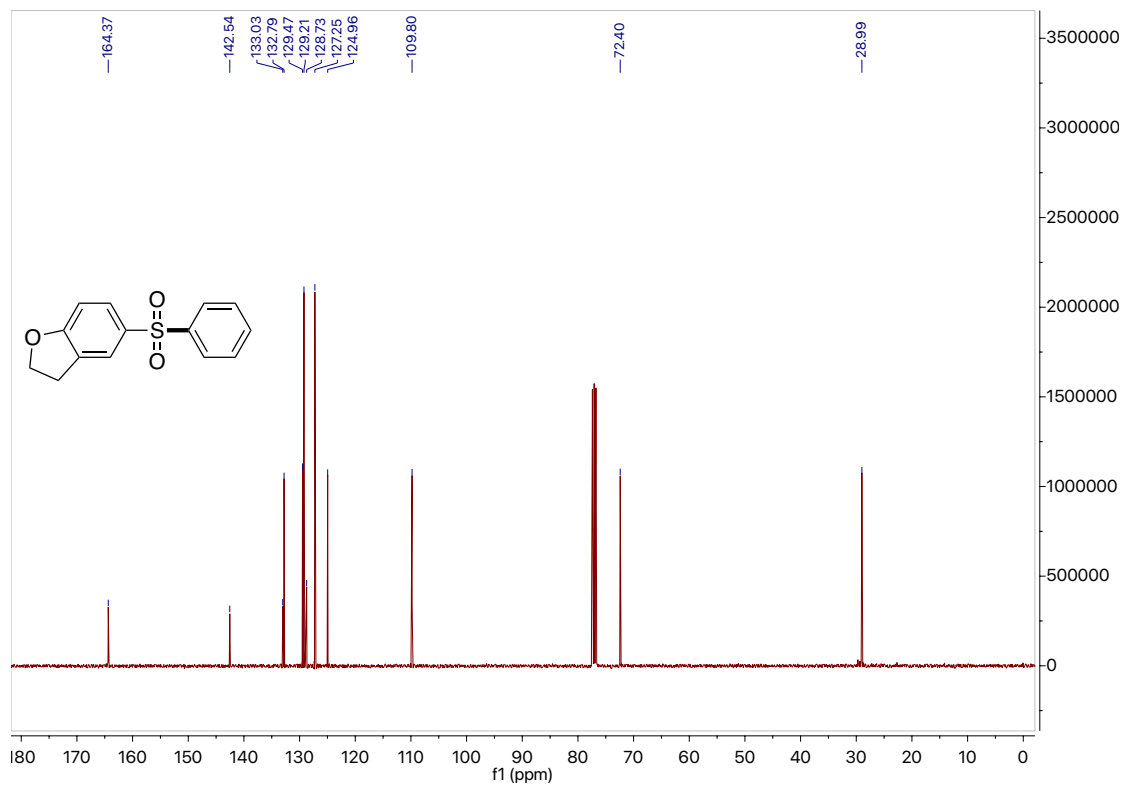

(4)  
**<sup>1</sup>H Spectra**

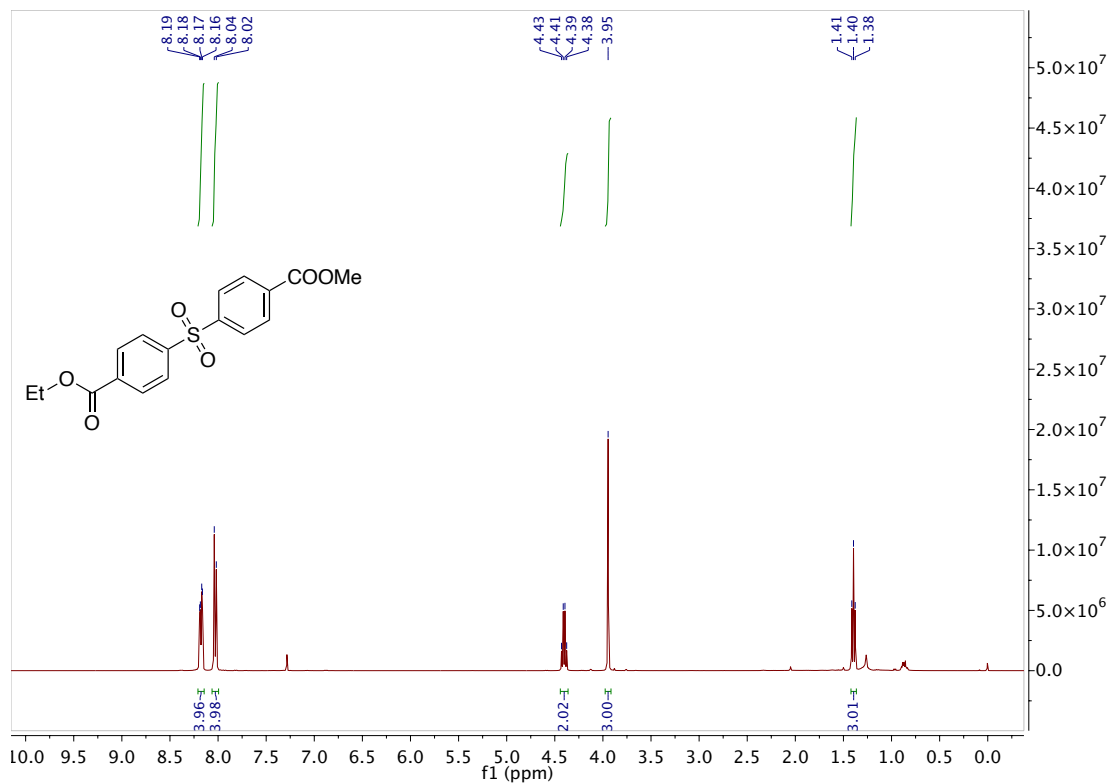

**<sup>13</sup>C Spectra**

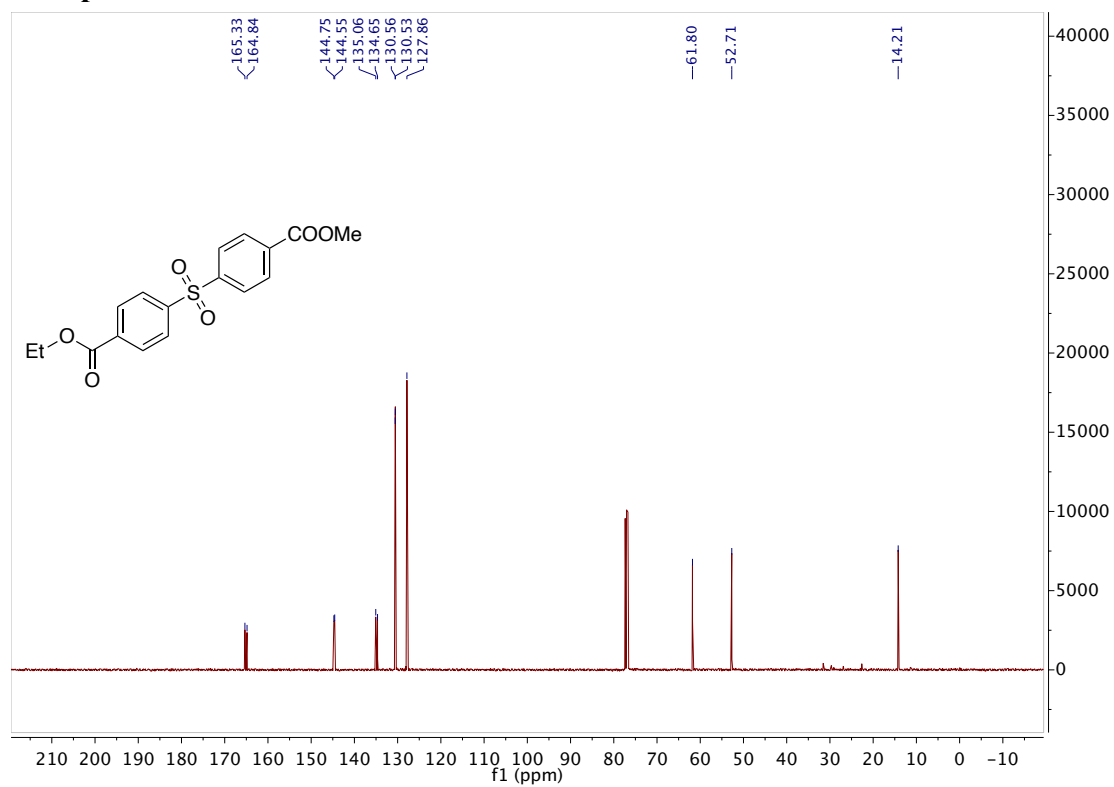

**(4k)**  
**<sup>1</sup>H Spectra**

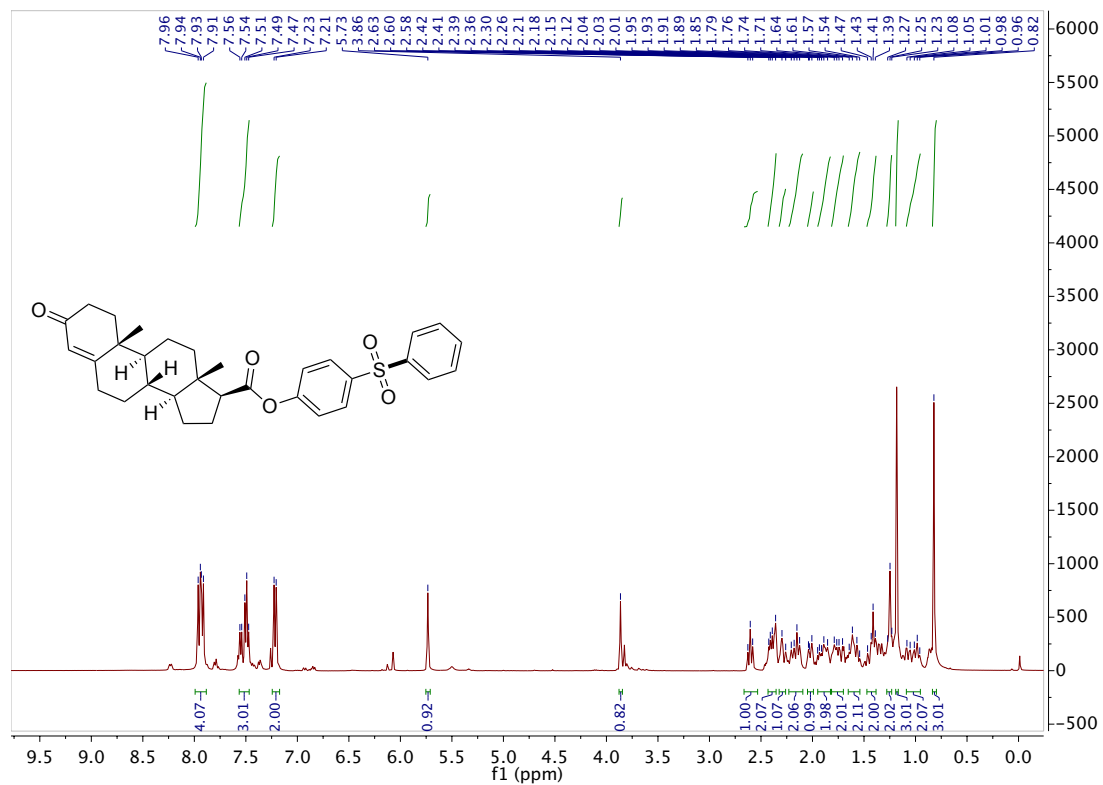

**<sup>13</sup>C Spectra**

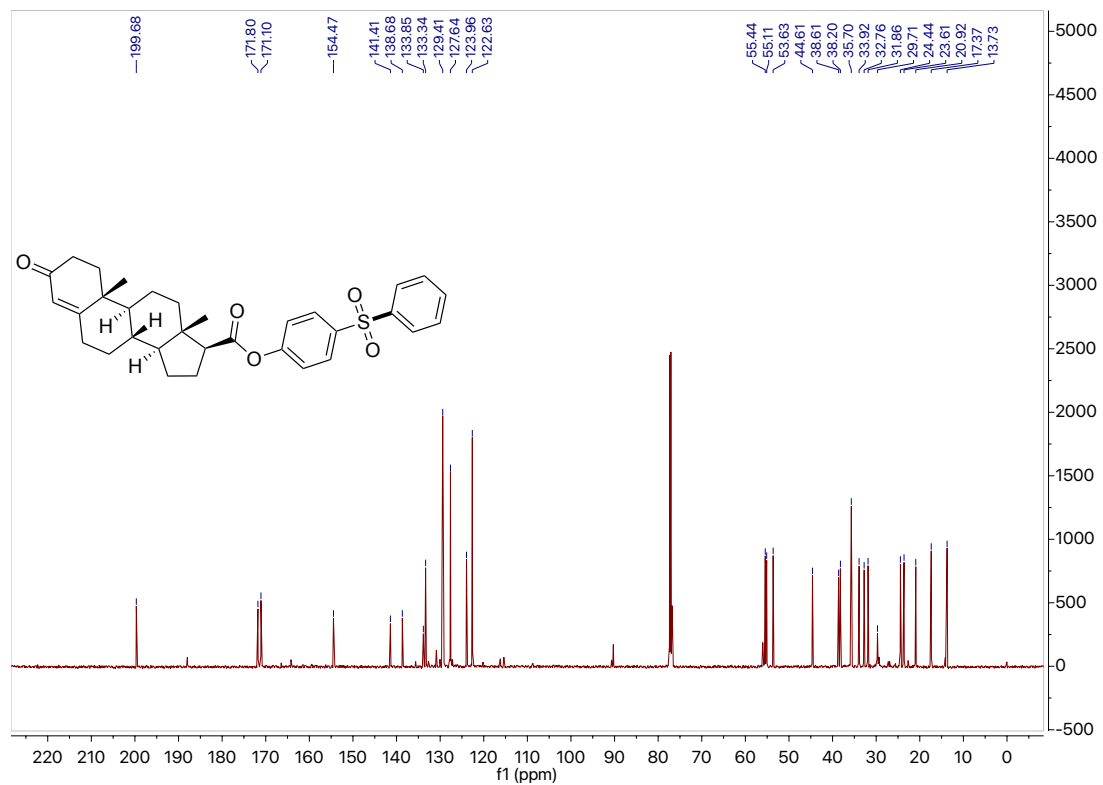

(4)  
**<sup>1</sup>H Spectra**

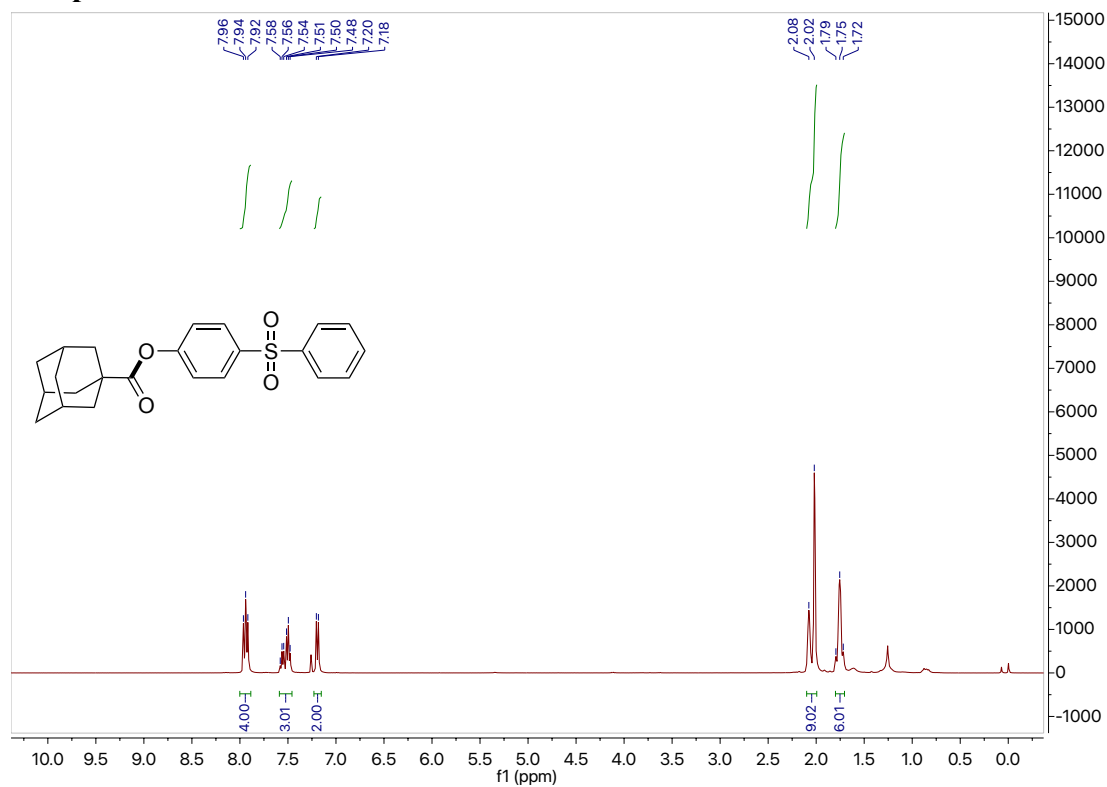

**<sup>13</sup>C Spectra**

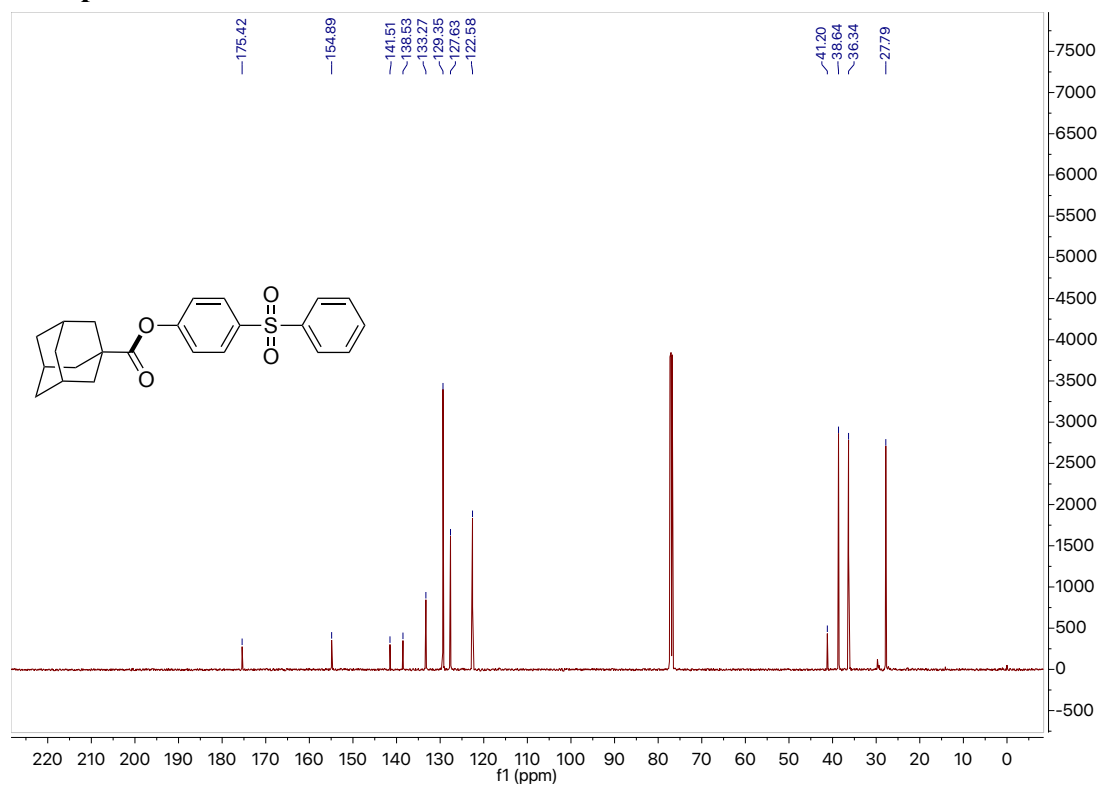

## 8. References

---

- [1] M.S. Lowry, J. I. Goldsmith, J. D. Slinker, R. Rohl, R. A. Pascal, G. G. Malliaras, and S. Bernhard, *Chem. Mater.*, 2005, **17**, 5712.
- [2] S. Ladouceur, D. Fortin, and E. Zsyman-Colman, *Inorg. Chem.*, 2011, **50**, 11514.
- [3] T. Rossolini, J. A. Leitch, R. Grainger, and D. J. Dixon, *Org. Lett.*, 2018, **20**, **21**, 6794-6798.
- [4] D. C. Reeves, S. Rodriguez, H. Lee, N. Haddad, D. Krishnamurthy, and C. H. Senanayake, *Tetrahedron Lett.*, 2009, **50**, 2870-2873.
- [5] K. Aboutayab, S. Caddick, K. Jenkins, S. Joshi, and S. Khan, *Tetrahedron*, 1996, **52**, 11329-11340.
- [6] J. S. Zhen, X. Du, X. H. Xu, Y. H. Li, H. Yuan, D. Xu, C. Xue and Y. Luo, *ACS Catal.*, 2022, **12**, 1986-1991.
- [7] Y. Luo, H. Ding, J. S. Zhen, X. Du, X. H. Xu, H. Yuan, Y. H. Li, W. Y. Qi, B. Z. Liu, S. M. Lu, C. Xue and Q. Ding, *Chem. Sci.*, 2021, **12**, 9556-9560.
- [8] a) G. Zhang, J. G. Fu, Q. Zhao, G. S. Zhang, M. Y. Li, C. G. Feng and G. Q. Lin, *Chem. Commun.*, 2020, **56**, 4688. b) M. Ishigaki, M. Inumaru and T. Satoh, *Tetrahedron Lett.*, 2011, **52**, 5563–5566.
- [9] R. A. Doohan, J. J. Hannan and Niall W. A. Geraghty, *Org. Biomol. Chem.*, 2006, **4**, 942–952.
- [10] X. Liang, Y. F. Li, Q. Xia, L. Cheng, J. B. Guo, P. Zhang, W. H. Zhang, and Q. M. Wang, *Green Chem.*, 2021, **23**, 8865.
- [11] S. Jiang, Z. T. Zhang, D. J. Young, L. L. Chai, Q. Wu, and H. X. Li, *Org. Chem. Front.*, 2022, **9**, 1437-1444.
